# Supplementary material
Source: publisher figshare collection journal article supplement (https://gsapubs.figshare.com/ndownloader/files/40896545)
Supplement: Supplementary file 1 [file 40896545]

## Sheet: Summary
	FIGURE 1
	W Borneo + SW Borneo																							Java + SE Borneo + Sulawesi
	Present Coordinates	1.53395, 110.36448	1.36719, 110.79088	0.996716, 110.60248	0.94992, 110.54335	-1.592222, 110.628056	1.025944, 109.602056	-1.988333, 111.183611	1.137583, 109.480250	0.878889, 109.506667	1.038611, 109.620278	0.994444, 109.563611	-0.566389, 110.426667	-0.168889, 110.848056	1.080556, 111.826111	0.781806, 109.529361	1.34482, 110.82286	2.011944, 109.646667	2.011944, 109.646667	1.051803, 111.835136	1.141889, 111.755622	1.18386, 110.26065	-0.692500, 111.705278	-4.47205, 119.69487	-4.46709, 119.70021	-4.471067, 119.697417	Karimunjawa	Karimunjawa
	Age	TRIAS	TRIAS	TRIAS	TRIAS	JURA	JURA	JURA	JURA	JURA	JURA	JURA	E CRETA	E CRETA	E CRETA	E CRETA	E CRETA	E CRETA	E CRETA	E CRETA	E CRETA	E CRETA	E CRETA	PERM	PERM	TRIAS	TRIAS	TRIAS
	Label	1001	1002	1003	1004	1005	1006	1007	1008	1009	1010	1011	1012	1013	1014	1015	1016	1017	1018	1019	1020	1021	1022	2001	2002	2003	2004	2005
		Kuching	Ngili 3	Sadong 2	Sadong 1	Ketapang 2	WK16*	Kuayan	WK18*	Bengkayang 3	Bengkayang 1	Bengkayang 2	Kerabai	WK27*	Lubuk antu 3	WK15.3*	Ngili 4	Serabang 3	Serabang 1	Lubuk antu 2	Lubuk antu 1	Pedawan 2	WK36*	Barru 3	Barru 2	Barru 1	Karimunjawa 1	Karimunjawa 2
	Maximum Likelihood Age (G&L, 1993)	230±2 Ma	216±3 Ma	213±2 Ma	206±2 Ma	197±1 Ma	182±2 Ma	180±3 Ma	171±2 Ma	158±1 Ma	157±2 Ma	154±3 Ma	137±1 Ma	132±1 Ma	123±1 Ma	120±3 Ma	120±2 Ma	119±1 Ma	117±1 Ma	115±2 Ma	110±2 Ma	102±1 Ma	101±2 Ma	253±4 Ma	252±4 Ma	250±5 Ma	242±2 Ma	240±2 Ma
Significant peaks* (Ma) (G&G, 1990)	>100 Ma					197			184	176	174	197	153	137	136	175		136	135	152	153	141	153
	200 Ma-300 Ma	247	251	256	252		217	230	245	268	243		237	255	256	241	262	236	232	266	253	249	233	269	284		248	249
	300 Ma-1000 Ma	355	375	458	358			440					432	559	630	341				511	603		512
								585					834											325	436	311	367	350
								910																437		434		438
	>1000 Ma	1903	1862	1879	1887		2000	2037		2046	2022		2054	1396	1131		1903	2008	2164	1688	1926	1932	1387		1137	1112	1386	1400
		2668		2352	2428				1851					2244	2103					2414				1591	1613	1587	2029	1634
	MIN	221	216	212	205	184	174.49	180	167.54	154	153	154	129	120.606	119	119.37	117	111	99	114.741	108.667	102	100.82	235.6	245.2	249	220.209	218.464
	10th	246.6	241.8	260	260.5	191.8	182.397	250.2	181.567	158	170.8	184	138.9	130.8	127	176.51	249	121	117	155.829	133.501	118.7	144.861	259.8	275.87	327.1	242.771	243.299
	20th	353.2	248	475.8	358.4	194	190.122	437	207.56	164.6	183.6	201	157.8	132.787	164	182.234	253	126	121.4	207.564	147.313	132.4	158.666	286.9	282.06	393.2	249.386	257.182
	25th Percentile	1773	249	1837.25	474	195	192.513	451	220.718	170.5	187	203	181.25	134.226	182	184.097	256	136.25	125.5	254.006	155.117	136.5	168.745	298.5	289.75	408.25	253.608	287.158
	30th	1839.6	249.2	1843.3	1837.4	195	195.023	563.8	228.417	172	206.9	204	187.4	135.838	243	189.924	257	147.7	130.1	274.162	160.567	141.7	176.227	317.4	298.96	432.3	277.098	332.368
	40th	1859.2	251	1857.4	1855.2	196	202.864	839.2	239.824	174	245	206	229	142.537	260	208.296	260	165	151.8	428.151	171.735	151.6	218.492	383.2	369.06	477.6	344.938	352.157
	50th Percentile	1869	252	1863	1865.5	197	238.62	1040	259.017	178	281.5	209	236	168.215	292	229.53	264	215	161.5	475.257	231.593	165	235.911	423.9	421.15	1129	363.512	384.245
	60th	1873.8	253	1868.6	1874.4	198	247.866	1747.6	331.565	182.6	1844	210	365.2	247.09	736	239.471	266	325.2	184.8	977.529	265.257	222.4	256.068	463.4	477.54	1545.6	451.639	771.1
	70th	1882.2	256	1877.7	1882.3	199	259.117	1842.6	1721.9	187.6	1862.3	211	499.4	299.058	1399	250.991	276	1823.3	235.9	1833.34	476.01	240.5	393.377	1456	1053.36	1569	1360.41	1414.13
	75th Percentile	1889	258	1885.25	1891	200	276.98	1853	1800.67	190	1867.75	211	678.5	380.538	1708	258.42	278.5	1843.5	248	1853.71	864.049	255.25	514.656	1528.4	1188.28	1572	1370.65	1421.23
	80th	1914.8	265.2	2015.4	1901.2	200.4	469.224	1856.6	1864.82	199	1883	212	947.6	435.988	1841	269.746	283	1854.6	255.6	1862.04	1838.95	268.6	620.04	1585.6	1476.56	1582	1385.19	1427.39
	90th	2281.4	365.2	2282.8	2230.1	204.2	1865.87	1937.8	1925.78	254.4	1935.2	230	1862.4	1141.51	1918	316.87	1619	1883.5	1712.5	2220.68	1934.86	902.5	1181.91	1629.6	1576.56	1644.3	1515.85	1467.76
	MAX	3436	1899	2732	2544	1893	2318.21	2568	2115.9	2728	2606	2453	2428	2726.86	2632	2557.72	2239	2572	2622	3124.08	3461.11	2502	2835.4	2455.6	2592.8	2483	2439.72	1776.23
	Range	3215	1683	2520	2339	1709	2143.72	2388	1948.36	2574	2453	2299	2299	2606.25	2513	2438.35	2122	2461	2523	3009.34	3352.45	2400	2734.58	2220	2347.6	2234	2219.51	1557.77
	Count	129	75	142	130	59	77	29	86	79	80	71	90	102	81	57	131	50	78	101	105	70	88	61	78	84	107	80
	Percentile/Chi	84.693	0.204997	77.4582	92.5962	0.0944862	2.60227	208.626	6.557	0.383292	7.83629	0.849515	11.2232	1.60531	21.8543	3.14527	0.317797	6.39722	2.63577	76.7857	7.47918	2.39842	10.1296	24.1324	15.9353	107.351	8.38698	13.2556
	Chi per DoF	19.1562	49.7568	20.695	17.3333	55.0345	21.6053	3.78571	11.8118	52.1795	14.1266	29.4286	8.65169	23.3069	7.55	16.8571	47.2	14.6939	16.8831	4.16	13.1154	19.3043	8.98851	6.8	9.11688	7.46988	14.3962	10.6329
	10-50 percentile Ma	1622.4	10.2	1603	1605	5.2	56.2228	789.8	77.4497	20	110.7	25	97.1	37.4149	165	53.0202	15	94	44.5	319.428	98.0923	46.3	91.0503	164.1	145.28	801.9	120.741	140.946
		PD	AC	PD	PD	AC	AC	PD	AC	AC	AC	AC	T	AC	PD	AC	AC	AC	AC	PD	AC	AC	T	PD	T	PD	AC	T
				Percentile/Chi
	AC	Active/Convergent		< 9.38
	PD	Passive/Divergent		> 21
	T	Transitional		In between
	FIGURE 2
	Banda terranes	-7.44969, 131.06177	-9.67540, 124.18033	-9.66932, 124.20803	-7.92535, 129.61152	-7.90444, 129.69472	-8.39416, 127.25536	-8.36095, 127.05971	-7.35016, 131.25173	-9.95033, 124.51512	-6.77665, 131.53466	-10.01289, 124.50585	-7.86355, 129.75467	-6.8853, 131.48984	-7.96466, 129.71965	-9.94526, 124.54567	-7.42787, 131.1999	-6.68698, 131.59646	-7.83627, 129.82776	-9.86163, 124.27678
	Present Coordinates	Wuliaru Island	Kekneno	Kekneno	Babar Island	Babar Island	Tutuala	Com	Wotap Island	Kolbano	Molu Island	Kolbano	Babar Island	Maru Island	Babar Island	Kolbano	Natraal Island	Molu Island	Babar Island	Soe	-9.55424, 124.36614	-7.22253, 131.38220	-8.47135, 126.51391	-7.09973, 131.46655	-7.32750, 131.29216	-7.12666, 131.43181	-9.69855, 119.45210	-9.65892, 119.75040	-9.78479, 119.62160	-9.69855, 119.45210	-9.92198, 124.25571	-10.12709, 120.32084
	Age	TRIAS	TRIAS	TRIAS	TRIAS	TRIAS	TRIAS	TRIAS	TRIAS	TRIAS	TRIAS	TRIAS	TRIAS	TRIAS	TRIAS	TRIAS	TRIAS	TRIAS	JURA	JURA	E CRETA	E CRETA	L CRETA	L CRETA	L CRETA	L CRETA	L CRETA	L CRETA	L CRETA	L CRETA	L CRETA	L CRETA
	Label	2001	2002	2003	2004	2005	2006	2007	2008	2009	2010	2011	2012	2013	2014	2015	2016	2017	2018	2019	2020	2021	2022	2023	2024	2025	2026	2027	2028	2029	2030	2031
		Maru 4	Niof 2	Niof 1	Maru 3	Jurassic SST 1	Babulu 1	Babulu 2	Maru 5	Niof 4	Maru 6	Niof 5	Maru 2	Maru 8	Maru 1	Niof 3	Ungar	Maru 7	Jurassic SST 2	Wai Luli	Oe Baat 2	Ungar-Upper SST 3	Seical	Ungar-Upper SST 4	Ungar-Upper SST 1	Ungar-Upper SST 2	Lasipu 4	Lasipu 6	Lasipu 1	Lasipu 3	Oe Baat 1	Lasipu 5
	Maximum Likelihood Age (G&L, 1993)	248±3 Ma	244±2 Ma	241±2 Ma	236±4 Ma	236±3 Ma	235±2 Ma	233±1 Ma	230±4 Ma	218±2 Ma	218±3 Ma	213±4 Ma	212±5 Ma	211±3 Ma	211±4 Ma	210 Ma	205±3 Ma	204±3 Ma	194±3 Ma	153±2 Ma	139±2 Ma	107±1 Ma	99±1 Ma	90±1 Ma	85±1 Ma	84±1 Ma	84±1 Ma	84±1 Ma	83±1 Ma	78±1 Ma	77±2 Ma	72±1 Ma
Significant age peaks* (Ma) (G&G, 1990)	>100 Ma																			161		109	158	131	117	90	89	96	92	86	93	84
																				181
	200 Ma-300 Ma		257	259	278		281	265	284	255	272	274	249	269	254	249	283	263	254	212		272	287	264	242	233	264	236	240	252	260	235
																				252
	300 Ma-1000 Ma	305	332	350	980	321	452	433	339	377	403	391	313	389	385	348	385	367	385			554	519	572	471	558	595	564	540	560	563	497
		411	936	595		482	836	877		689		668	404		665	560			718		776	929	692		871	846			922			959
		678				990
	>1000 Ma	1721	1748	1640	1842	1794	1774	1746	1858	1668	1532	1675	1782	1990	1728	1689	1568	1885	1624		1684	1930	1838	1129	1946	2740	1609	1644	2123	1385	1277	2114
		2196	2254	2335	2569	2664	2966	2648		2642	1994	2640	2602		2331	2845	2008	2448	1995		2671			2342							2246
	MIN	246.5	237.2	230.5	235.9	235.5	230.5	227.7	228.8	217.1	216.8	209.5	209.7	210.2	209.5	208.1	203.1	202.2	193.4	148.2	138.7	103.6	97.3	89.5	84.6	83.7	82.8	81.5	79.1	77.8	75.5	71.9
	10th	295.6	245.44	247.26	266.72	312.44	244.56	241.24	276.52	259.22	242.6	258.15	256.26	245.1	247.3	234	266.02	233.18	234.7	157.77	636.65	178.58	169.2	121.2	143.98	163.6	91.16	89.36	146.83	100.8	108.5	80.19
	20th	330.1	264.58	261.42	291.22	339.74	274.98	259.02	298.04	329.18	268.7	270.3	279.28	266.7	265.9	255.92	286.64	263.98	262.3	160.78	796.2	269	230.5	182.8	200.14	230.78	238.64	100.26	270.04	248.2	249.5	82.38
	25th Percentile	355.975	284.375	278.95	315.1	363.3	283.05	279.95	304.95	336.4	276.575	288.2	291.15	268.7	272.95	277.2	290.9	274.225	278.075	162.325	845.125	275.6	263.6	220.75	228.05	236.6	259.75	113.525	447.525	264.9	302.75	83.2
	30th	450.5	296.55	298.1	330.3	457.1	298.8	306.04	313.2	341	290	297.25	307.4	272.75	285.9	290.82	299.56	282.99	292.4	164.4	931.25	297.72	281	246.2	247.53	258.8	274.02	208.06	490.76	357.2	390.79	84.36
	40th	1185.3	320.96	326.06	445.56	949.34	328.72	365.76	326.6	375.96	303.1	342.1	319.14	284.5	355.3	326.32	312.88	304.98	351.8	170.04	1123.6	468.26	317.6	276.9	291.54	287.62	502.42	330.02	534.74	518.2	539.22	88.02
	50th Percentile	1553.35	339.15	356.3	1616.8	1251.1	418.7	503	351.95	479.7	341.3	431.3	361.1	292.4	398.7	400.7	357	321.2	400	174.35	1304.75	596.8	461.3	373.5	409.9	514.1	589.4	541.55	596.05	580.8	598.4	207.35
	60th	1608	941.56	501.1	1848.38	1575.32	490.64	995.98	1463.04	1138.46	436.7	893.7	398.38	351	489.3	602.08	408.26	380.44	469.7	179.44	1566.4	769.14	554.4	556.1	494.32	572.62	1056.9	619	871.96	765.3	898.22	253.58
	70th	1772.45	1531.17	869.56	1860.04	1742.9	1169.04	1586.58	1853.85	1573.06	1099.85	1510.2	473.18	378.45	1531.5	1536.88	1533.4	1115.35	1651.8	184.14	1755	1109.04	608	737.3	557.68	666.56	1228.52	705.24	1076.5	978.3	1171.47	513.84
	75th Percentile	1827.97	1620.35	1189.6	1862.9	1810.8	1557.2	1688	1863	1602.8	1472.22	1584.62	1553.8	395.875	1601.2	1573.2	1625.4	1700.7	1820.15	186.2	1778.92	1167.4	660.6	954.6	650.8	778.1	1415.3	1082.9	1132.45	1096.85	1487.08	570.275
	80th	1852.4	1724.5	1555.68	1873.44	1866.52	1713.98	1753.68	1870.44	1734.22	1545.5	1691.2	1664.3	418.2	1701.9	1742.78	1842.64	1848.94	1854	190.42	1828.3	1470.52	786	1114.1	917.92	886.56	1643.46	1507.96	1390.84	1427.2	1616.08	846.68
	90th	1869.55	1880.94	1717.98	1890.26	1901.1	1862.9	1881.96	1890.12	1841.18	1750.95	1867.2	1860.54	1866	1870.1	1827.66	1877.2	1891.1	1977.65	220.28	2192.25	1728.96	1535.2	1688.8	1560.66	1088.04	1870.34	1682.78	1800.74	1712.3	1811.19	1642.07
	MAX	2512.7	2517	2531.4	2628.7	3134.8	3422.2	3267.9	3429.3	2770.7	3926.2	2963.7	2726.2	3224.4	2604.9	3014	2520.3	2602.6	2537.9	549.3	3340.3	2697.5	2641	2812	2772.9	3195.5	3586.9	2609	2766.4	3642.9	2820	2697.3
	Range	2266.2	2279.8	2300.9	2392.8	2899.3	3191.7	3040.2	3200.5	2553.6	3709.4	2754.2	2516.5	3014.2	2395.4	2805.9	2317.2	2400.4	2344.5	401.1	3201.6	2593.9	2543.7	2722.5	2688.3	3111.8	3504.1	2527.5	2687.3	3565.1	2744.5	2625.4
	Count	116	58	119	45	133	130	107	104	77	126	126	123	86	111	113	123	138	126	128	36	139	141	131	122	37	103	32	158	91	132	128
	Percentile/Chi	213.335	10.3117	11.9136	144.887	209.296	21.5173	36.9954	5.43307	43.8651	11.1149	28.5538	12.1122	2.87179	20.3098	23.8752	8.67153	9.13541	25.0758	0.314653	354.295	99.1656	60.8542	49.1003	54.7216	72.5172	116.028	104.611	115.619	123.429	134.825	4.80635
	Chi per DoF	5.89565	9.08772	9.15254	9.31818	4.48485	8.09302	7.07547	13.8835	5.02632	8.88	6.064	8.65574	16.4706	7.45455	6.98214	10.4918	9.63504	6.592	52.6929	1.88571	4.21739	4.8	5.13846	4.8595	4.83333	4.29412	4.32258	3.88535	3.88889	3.63359	26.4567
	10-50 percentile Ma	1257.75	93.71	109.04	1350.08	938.66	174.14	261.76	75.43	220.48	98.7	173.15	104.84	47.3	151.4	166.7	90.98	88.02	165.3	16.58	668.1	418.22	292.1	252.3	265.92	350.5	498.24	452.19	449.22	480	489.9	127.16
		PD	T	T	PD	PD	PD	PD	AC	PD	T	PD	T	AC	T	PD	AC	AC	PD	AC	PD	PD	PD	PD	PD	PD	PD	PD	PD	PD	PD	AC
				Percentile/Chi
	AC	Active/Convergent		< 9.38
	PD	Passive/Divergent		> 21
	T	Transitional		In between
	*This study
	*Only ages more than 5% are listed
	*Coordinates in red are not exact as the authors didn't provide them
	* ☐ "Thick outside border" Data used in Figure 1 and Figure 2

## Sheet: This study U-Pb
Look below for analytical procedure and references
	WK-15.3 (n=57) (0°46′54.5″ N, 109°31′45.7″ E)
Spot	Pb(ppm)	Th(ppm)	U(ppm)	Th/U	U-Th-Pb ratios									Ages (Ma)										Inferred Age (Ma)	1σ	Discodance (%)	Notes
					207Pb/206Pb	1σ	207Pb/235U	1σ	206Pb/238U	1σ	Rho	208Pb/232Th	1σ	207Pb/206Pb	1σ	207Pb/235U	1σ	206Pb/238U	1σ	208Pb/232Th	1σ	Conc age	1σ
WK-15.3-1	80.447	826.143	1763.32	0.468515	0.0589147	0.00176827	0.318766	0.0107586	0.0388753	0.00103676	0.790176	0.0128721	0.000513894	564.85	64.8025	280.953	8.28574	245.858	6.43466	258.514	10.2549	253.74	6.27	253.74	6.27	12.4916	Concordia age
WK-15.3-12	12.2103	249.35	335.942	0.74224	0.054646	0.00281538	0.209931	0.0112729	0.0279512	0.000677391	0.451315	0.0079165	0.000348925	398.2	114.805	193.495	9.46122	177.713	4.24909	159.38	6.99716			177.713	4.24909	8.15632	6/8 age
WK-15.3-16	24.3053	574.341	557.734	1.02978	0.0541592	0.00189343	0.215951	0.00836667	0.0289698	0.000754332	0.672079	0.00919437	0.000301205	375.98	77.77	198.534	6.98792	184.097	4.72687	184.99	6.03256			184.097	4.72687	7.27192	6/8 age
WK-15.3-17	146.95	2593.86	3114.26	0.832898	0.052704	0.00117727	0.278154	0.0107596	0.0383753	0.00146101	0.984212	0.00889732	0.00024055	316.725	49.995	249.192	8.54929	242.754	9.07116	179.039	4.81917			242.754	9.07116	2.58328	6/8 age
WK-15.3-18	26.3111	388.466	793.164	0.489767	0.0600061	0.00271451	0.234714	0.0124608	0.0280845	0.000581859	0.390254	0.00878469	0.000380113	605.575	98.135	214.083	10.2483	178.549	3.64972	176.783	7.61603	175.15	3.56	175.15	3.56	16.5985	Concordia age
WK-15.3-19	86.3008	716.359	2086.55	0.343323	0.0553216	0.00133674	0.287697	0.00787044	0.037607	0.000731736	0.711249	0.0129432	0.000356813	433.38	55.55	256.745	6.20851	237.983	4.54792	259.932	7.11983			237.983	4.54792	7.30761	6/8 age
WK-15.3-20	145.761	290.147	607.357	0.477722	0.0920426	0.00205995	2.3969	0.0770179	0.188194	0.00504236	0.833847	0.0808085	0.00408292	1533.34	42.595	1241.68	23.0372	1111.59	27.3633	1570.68	76.3547			1111.59	27.3633	10.477	6/8 age
WK-15.3-23	25.6572	164.761	663.043	0.248493	0.0548882	0.00168877	0.288134	0.0100179	0.0378983	0.000810982	0.615476	0.0129242	0.000481399	409.31	65.735	257.09	7.8986	239.792	5.03869	259.553	9.60599			239.792	5.03869	6.72809	6/8 age
WK-15.3-25	8.23279	98.6955	277.71	0.355391	0.0571017	0.00429569	0.207014	0.0152235	0.0267192	0.00134569	0.684868	0.00996127	0.000796154	494.485	166.645	191.044	12.8072	169.982	8.44963	200.343	15.9333	174.57	7.98	174.57	7.98	11.0246	Concordia age
WK-15.3-26	8.94054	94.9987	249.505	0.380749	0.0709113	0.00402631	0.284285	0.0153999	0.0291831	0.00106683	0.674839	0.0130224	0.000718815	954.625	149.077	254.051	12.1767	185.434	6.68299	261.513	14.3421	194.68	6.5	194.68	6.5	27.0092	Concordia age
WK-15.3-27	80.6058	465.58	2113.2	0.22032	0.0648631	0.00178242	0.332123	0.00945112	0.0369966	0.000783411	0.74412	0.0143766	0.000556661	768.52	58.4825	291.185	7.20664	234.189	4.87166	288.515	11.0919	243.86	4.77	243.86	4.77	19.5737	Concordia age
WK-15.3-29	65.2141	521.955	1787.8	0.291953	0.0572829	0.00146872	0.282947	0.00867281	0.0357475	0.000897677	0.819257	0.0113066	0.000342605	501.89	55.55	252.993	6.86621	226.42	5.58841	227.25	6.84739	232.75	5.46	232.75	5.46	10.5035	Concordia age
WK-15.3-31	19.245	364.846	573.097	0.636621	0.051322	0.00172195	0.192525	0.0068457	0.0271358	0.000600091	0.621932	0.00873313	0.000301694	253.77	77.765	178.781	5.83009	172.597	3.76739	175.75	6.04512			172.597	3.76739	3.45883	6/8 age
WK-15.3-32	35.7776	563.033	585.6	0.961463	0.0650455	0.00418185	0.345765	0.0257035	0.0383236	0.00129649	0.455082	0.0150658	0.000594243	775.93	135.178	301.531	19.3945	242.433	8.05027	302.242	11.8327	238.85	8.02	238.85	8.02	19.5992	Concordia age
WK-15.3-33	32.6323	645.802	802.823	0.804413	0.0654901	0.00227983	0.263638	0.0115317	0.0288556	0.000714596	0.56617	0.0107146	0.000407075	790.74	72.215	237.594	9.26756	183.382	4.47848	215.414	8.14066	177.51	4.44	177.51	4.44	22.8173	Concordia age
WK-15.3-34	65.9013	1087.08	948.1	1.14658	0.0647008	0.0018361	0.402117	0.0116933	0.0458588	0.00157559	0.84638	0.0159076	0.000691299	764.82	64.965	343.183	8.47126	289.047	9.71279	318.998	13.7539	324.02	8.32	324.02	8.32	15.7746	Concordia age
WK-15.3-35	19.4903	268.932	586.824	0.458284	0.0683181	0.00292893	0.273702	0.0115709	0.0292148	0.000698298	0.565391	0.00945162	0.000366957	879.63	88.885	245.65	9.22574	185.632	4.37489	190.141	7.34758	191.08	4.31	191.08	4.31	24.4323	Concordia age
WK-15.3-37	75.829	890.736	1680.06	0.530182	0.0533655	0.00125652	0.288012	0.00759716	0.0389975	0.000859922	0.835952	0.0119892	0.000317178	342.65	49.07	256.993	5.99165	246.616	5.33701	240.886	6.33492			246.616	5.33701	4.03799	6/8 age
WK-15.3-38	61.4644	615.034	1413.97	0.43497	0.0631252	0.00203799	0.325612	0.0115437	0.0371597	0.000829268	0.629475	0.0136687	0.000641987	722.23	73.14	286.21	8.84429	235.203	5.15584	274.404	12.801	238.99	5.16	238.99	5.16	17.8215	Concordia age
WK-15.3-4	85.0555	2493.81	1225.77	2.03449	0.0707045	0.00189787	0.320908	0.0105809	0.0327402	0.00093068	0.862135	0.00980633	0.000300807	949.995	54.165	282.601	8.13585	207.676	5.81043	197.242	6.02094	210.96	5.94	210.96	5.94	26.5127	Concordia age
WK-15.3-40	9.95946	161.986	179.563	0.902111	0.0578087	0.00271323	0.313744	0.0143903	0.0395925	0.00106719	0.587674	0.0124644	0.000474834	524.11	108.317	277.079	11.1237	250.306	6.61894	250.376	9.47929			250.306	6.61894	9.66248	6/8 age
WK-15.3-41	84.6107	629.319	2008.69	0.313298	0.0582212	0.00139131	0.327692	0.00886773	0.0406355	0.000946561	0.86079	0.0133555	0.000390643	538.925	53.6975	287.803	6.78462	256.771	5.86529	268.159	7.79171	266.63	5.6	266.63	5.6	10.7824	Concordia age
WK-15.3-42	11.8133	151.445	332.77	0.455105	0.0687794	0.00324987	0.272908	0.0133057	0.0287104	0.00071117	0.508058	0.011829	0.000557602	892.28	98.15	245.016	10.6151	182.472	4.45764	237.688	11.1386	184.76	4.46	184.76	4.46	25.5265	Concordia age
WK-15.3-43	44.2854	792.145	1102.26	0.718653	0.0667854	0.00220509	0.274646	0.0111058	0.0295175	0.000742866	0.622377	0.010641	0.000354462	831.48	68.5175	246.401	8.84849	187.527	4.65263	213.943	7.08903	183.75	4.67	183.75	4.67	23.8934	Concordia age
WK-15.3-47	37.7273	785.042	978.568	0.802236	0.0499751	0.00162775	0.208345	0.00753209	0.0300683	0.000768333	0.70682	0.00923396	0.000346726	194.525	108.317	192.163	6.33063	190.976	4.80952	185.782	6.94398			190.976	4.80952	0.617953	6/8 age
WK-15.3-48	56.6411	420.973	1287.88	0.326873	0.049791	0.00125594	0.295877	0.00756805	0.0431137	0.00106331	0.964209	0.0122473	0.000442892	183.415	59.25	263.175	5.93263	272.104	6.57285	246.041	8.84353			272.104	6.57285	-3.39295	6/8 age
WK-15.3-49	43.9647	580.502	1472.91	0.394119	0.0564244	0.00142058	0.210704	0.00543737	0.0268939	0.000502687	0.724316	0.00871427	0.000298153	477.82	55.55	194.143	4.56208	171.079	3.15701	175.372	5.97427	175.94	3.03	175.94	3.03	11.8801	Concordia age
WK-15.3-50	8.81977	116.245	253.9	0.457836	0.0701749	0.00368392	0.26436	0.0131901	0.0275929	0.000752566	0.546633	0.012023	0.00057184	1000	108.493	238.175	10.5939	175.466	4.72203	241.562	11.4208	181.94	4.6	181.94	4.6	26.3291	Concordia age
WK-15.3-51	65.3428	696.365	1618.96	0.430132	0.0547686	0.00127004	0.275786	0.00716611	0.0362474	0.000757437	0.804192	0.0111456	0.00031308	466.71	51.8475	247.31	5.7059	229.53	4.71359	224.032	6.25829			229.53	4.71359	7.18911	6/8 age
WK-15.3-53	282.846	213.424	500.05	0.426804	0.162992	0.00290153	10.4017	0.21165	0.459276	0.00859947	0.920205	0.12125	0.003104	2486.73	29.94	2471.2	18.9233	2436.36	38.0113	2313.17	55.9542			2486.73	29.94	2.02548	7/6 age
WK-15.3-55	40.6434	674.346	691.651	0.974981	0.0697568	0.00240364	0.368659	0.0123545	0.0383864	0.000854301	0.664101	0.0127529	0.000397552	920.37	70.3725	318.659	9.16811	242.824	5.30521	256.135	7.93423	253.73	5.16	253.73	5.16	23.7983	Concordia age
WK-15.3-60	43.5796	946.863	1104.07	0.857614	0.0576965	0.00187001	0.221961	0.00773635	0.0277765	0.000613334	0.63352	0.00919961	0.000324721	516.705	65.7325	203.541	6.42998	176.617	3.84813	185.095	6.50351	179.63	3.8	179.63	3.8	13.2277	Concordia age
WK-15.3-61	195.274	218.975	300.426	0.728881	0.169977	0.00382536	10.6576	0.276167	0.451506	0.00921129	0.787305	0.133245	0.00481824	2557.72	37.1925	2493.73	24.1141	2401.95	40.9297	2528.25	85.9368			2557.72	37.1925	6.09018	7/6 age
WK-15.3-63	32.3245	222.222	730.213	0.304325	0.0633561	0.00203499	0.348297	0.0112933	0.0399547	0.000961116	0.741887	0.0153343	0.00054696	720.38	68.5125	303.439	8.50731	252.552	5.95928	307.589	10.8883	263.27	5.73	263.27	5.73	16.7702	Concordia age
WK-15.3-64	68.9724	203.418	907.24	0.224216	0.0760888	0.00164635	0.75617	0.0218272	0.0714828	0.00160875	0.779666	0.0261065	0.00123237	1098.15	43.055	571.798	12.6261	445.083	9.6818	520.901	24.2751	446.2	10.2	446.2	10.2	22.1608	Concordia age
WK-15.3-65	110.902	1192.71	2911.43	0.409664	0.0682827	0.00175876	0.300706	0.00857375	0.0318164	0.000662383	0.730177	0.0121971	0.000394762	876.85	47.995	266.951	6.69548	201.907	4.13976	245.04	7.88287	206.52	4.16	206.52	4.16	24.3657	Concordia age
WK-15.3-66	54.1051	561.496	1367.27	0.410668	0.0545536	0.00144113	0.271983	0.00833071	0.0360646	0.000799832	0.724064	0.0107584	0.000356375	394.495	54.625	244.278	6.65221	228.393	4.9781	216.289	7.12646			228.393	4.9781	6.50267	6/8 age
WK-15.3-67	20.9776	357.819	554.512	0.645285	0.0697399	0.00336848	0.274501	0.0133263	0.0286869	0.0006959	0.499685	0.00998854	0.000467707	920.37	99.2275	246.286	10.6183	182.325	4.36207	200.889	9.35991	185.72	4.34	185.72	4.34	25.9704	Concordia age
WK-15.3-69	20.9277	343.486	648.833	0.52939	0.0535313	0.00163298	0.201424	0.00712463	0.0272547	0.000623925	0.647204	0.00876378	0.000287704	350.055	70.365	186.331	6.02271	173.343	3.91649	176.364	5.76461			173.343	3.91649	6.97002	6/8 age
WK-15.3-70	24.893	431.656	669.582	0.644665	0.0564954	0.00199658	0.220246	0.00819735	0.0283853	0.000659459	0.624209	0.0102124	0.000355004	472.265	79.6225	202.115	6.82251	180.434	4.13496	205.368	7.10289	183.41	4.05	183.41	4.05	10.7268	Concordia age
WK-15.3-71	36.2287	475.572	872.56	0.54503	0.0528457	0.00158212	0.24834	0.00833797	0.0340362	0.000777143	0.680058	0.0114543	0.000345009	320.43	66.66	225.227	6.78372	215.76	4.84628	230.201	6.89442			215.76	4.84628	4.20312	6/8 age
WK-15.3-72	44.5371	1585.27	1737.62	0.912326	0.0556717	0.00241886	0.141721	0.00619527	0.0184561	0.00039601	0.490842	0.00528218	0.000159187	438.935	96.2875	134.576	5.51049	117.891	2.50739	106.484	3.20061	119.37	2.46	119.37	2.46	12.3981	Concordia age
WK-15.3-73	105.802	834.401	2632.54	0.316957	0.0586191	0.00129729	0.308909	0.00974335	0.0384174	0.00124181	0.975779	0.0123023	0.000393922	553.74	52.7675	273.335	7.56067	243.016	7.71015	247.141	7.86528	258.42	7.38	258.42	7.38	11.0924	Concordia age
WK-15.3-74	22.0254	167.471	430.656	0.388873	0.062288	0.00228602	0.408282	0.0196602	0.0477305	0.00161827	0.704086	0.0174729	0.00076305	683.345	78.8525	347.637	14.1772	300.573	9.9581	350.116	15.1581	301.8	10.1	301.8	10.1	13.5383	Concordia age
WK-15.3-76	70.1567	737.393	1639.51	0.449764	0.059007	0.00153065	0.305373	0.00839946	0.0376716	0.000844139	0.814666	0.0113425	0.000381135	568.55	62.025	270.589	6.5361	238.384	5.24569	227.967	7.61719	247.41	4.98	247.41	4.98	11.9015	Concordia age
WK-15.3-77	37.2526	704.555	872.196	0.807795	0.0539822	0.00185996	0.252816	0.0135044	0.0337084	0.00119843	0.665583	0.0131667	0.000873129	368.57	77.77	228.861	10.9462	213.716	7.47454	264.392	17.4185			213.716	7.47454	6.61748	6/8 age
WK-15.3-79	75.2349	295.029	1796.03	0.164267	0.0572516	0.0013472	0.338532	0.00917046	0.0428581	0.000906932	0.781178	0.0151853	0.000507639	501.89	51.8475	296.058	6.95944	270.524	5.60809	304.621	10.107			270.524	5.60809	8.62466	6/8 age
WK-15.3-8	39.8938	496.244	884.741	0.560892	0.0550842	0.00132877	0.280837	0.00766442	0.0366911	0.000732999	0.732011	0.0111571	0.000313992	416.715	58.3275	251.321	6.07837	232.29	4.5597	224.26	6.27645			232.29	4.5597	7.57239	6/8 age
WK-15.3-81	87.2511	943.93	2442.84	0.386407	0.0545575	0.00144847	0.257012	0.00891491	0.0343906	0.00110355	0.925099	0.00979542	0.000339182	394.495	54.625	232.256	7.20297	217.969	6.87843	197.024	6.78911			217.969	6.87843	6.1513	6/8 age
WK-15.3-82	40.1865	344.788	694.686	0.496321	0.0554461	0.00148103	0.380208	0.0126193	0.0496062	0.00125256	0.760762	0.017188	0.000573484	431.53	59.255	327.191	9.28633	312.104	7.69474	344.457	11.3955			312.104	7.69474	4.61113	6/8 age
WK-15.3-83	85.9631	110.604	264.304	0.418473	0.110511	0.00250294	4.02475	0.110595	0.265026	0.00688022	0.944752	0.0982753	0.00326205	1809.26	41.8275	1639.21	22.3764	1515.5	35.0703	1894.72	60.0336			1515.5	35.0703	7.54667	6/8 age
WK-15.3-84	10.2022	169.899	258.828	0.656419	0.0579331	0.00272072	0.241177	0.0115661	0.0302174	0.00075721	0.522528	0.0102192	0.000394706	527.815	103.688	219.384	9.46315	191.909	4.73925	205.504	7.89718	194.61	4.66	194.61	4.66	12.5238	Concordia age
WK-15.3-85	24.4519	146.62	567.342	0.258434	0.0540176	0.00169094	0.318386	0.0108878	0.0429354	0.00113028	0.76981	0.0144234	0.000707104	372.275	70.3625	280.66	8.38767	271.003	6.98784	289.447	14.0889			271.003	6.98784	3.44109	6/8 age
WK-15.3-87	15.2748	222.405	473.567	0.469638	0.0598934	0.00202185	0.229086	0.00911326	0.0276216	0.000725691	0.660433	0.00917085	0.00044555	598.17	74.0625	209.444	7.53007	175.645	4.55335	184.518	8.92372	176.89	4.58	176.89	4.58	16.1374	Concordia age
WK-15.3-88	30.8928	486.441	797.067	0.610288	0.0563846	0.00179226	0.238941	0.00762655	0.0309411	0.000764764	0.77438	0.0104069	0.000392556	477.82	102.765	217.553	6.25215	196.436	4.7832	209.259	7.85271			196.436	4.7832	9.70675	6/8 age
WK-15.3-9	8.66007	155.007	254.701	0.608586	0.0603432	0.0027016	0.222795	0.00954639	0.0270626	0.000707159	0.609837	0.00811579	0.000453305	616.685	96.2825	204.233	7.92834	172.138	4.43949	163.376	9.08854	177.47	4.23	177.47	4.23	15.7152	Concordia age
WK-15.3-90	82.1284	556.974	1674.85	0.332552	0.0604844	0.00149912	0.381634	0.0129974	0.0454284	0.00123473	0.798061	0.0147195	0.000531234	620.39	53.6925	328.24	9.55461	286.393	7.6153	295.345	10.5817	291.02	7.72	291.02	7.72	12.7488	Concordia age
	WK-16 (n=77) (1°01′33.4″ N, 109°36′07.4″ E)
Spot	Pb(ppm)	Th(ppm)	U(ppm)	Th/U	U-Th-Pb ratios									Ages (Ma)										Inferred Age (Ma)	1σ	Discodance (%)	Notes
					207Pb/206Pb	1σ	207Pb/235U	1σ	206Pb/238U	1σ	Rho	208Pb/232Th	1σ	207Pb/206Pb	1σ	207Pb/235U	1σ	206Pb/238U	1σ	208Pb/232Th	1σ	Conc age	1σ
WK-16-1	29.4186	297.045	328.06	0.905459	0.064198	0.00226873	0.536849	0.0216705	0.0602171	0.00128612	0.52911	0.020793	0.000735636	750.005	74.0675	436.345	14.3206	376.945	7.82262	415.962	14.566	378.2	7.88	378.2	7.88	13.613	Concordia age
WK-16-10	8.54398	90.9745	254.512	0.357446	0.0553262	0.00222824	0.22155	0.00927831	0.0291524	0.000587154	0.480928	0.0104576	0.000469879	433.38	95.36	203.199	7.71361	185.241	3.67918	210.274	9.39901			185.241	3.67918	8.83749	6/8 age
WK-16-101	14.3582	223.81	415.948	0.538072	0.0487439	0.00181001	0.189068	0.00752707	0.0279133	0.000553806	0.498353	0.00928415	0.000348479	200.075	82.395	175.833	6.42872	177.475	3.47444	186.788	6.97875			177.475	3.47444	-0.933742	6/8 age
WK-16-103	8.02093	91.3552	217.435	0.420149	0.0576059	0.00372213	0.234591	0.014469	0.0298679	0.000878662	0.476966	0.0119908	0.000706076	522.26	142.572	213.981	11.9009	189.722	5.5009	240.919	14.1023	192.96	5.25	192.96	5.25	11.3372	Concordia age
WK-16-105	46.0561	824.415	790.627	1.04274	0.0650817	0.00202329	0.333351	0.0117825	0.0369462	0.000932394	0.713991	0.0119754	0.000462308	775.93	66.66	292.121	8.97492	233.876	5.79782	240.613	9.2337	238.62	5.83	238.62	5.83	19.9385	Concordia age
WK-16-106	63.6836	879.399	1310.21	0.671187	0.055989	0.00167885	0.284047	0.00913431	0.0366873	0.000808737	0.685499	0.011901	0.000396962	453.75	66.66	253.863	7.22518	232.266	5.03052	239.125	7.92912			232.266	5.03052	8.50712	6/8 age
WK-16-107	7.58325	132.847	194.791	0.681995	0.0548939	0.00338377	0.223051	0.0138949	0.0297991	0.00069805	0.376039	0.0103794	0.000575286	409.31	137.023	204.446	11.5365	189.291	4.3709	208.71	11.5084			189.291	4.3709	7.41288	6/8 age
WK-16-110	88.2753	1323.06	1669.68	0.792405	0.0600497	0.00135983	0.309901	0.00751556	0.0373112	0.00064305	0.71067	0.0122581	0.000327726	605.575	43.51	274.104	5.82874	236.145	3.9983	246.258	6.54385	242.73	3.91	242.73	3.91	13.8486	Concordia age
WK-16-12	354.166	228.167	797.951	0.285941	0.142448	0.00241829	7.68399	0.216221	0.387267	0.00839212	0.770104	0.122268	0.00290727	2257.1	29.785	2194.73	25.3258	2110.14	39.0135	2331.52	52.3604			2257.1	29.785	6.51086	7/6 age
WK-16-13	6.21845	74.0431	159.254	0.464937	0.06124	0.00312549	0.256355	0.0121292	0.0311235	0.000737372	0.500733	0.0110675	0.00061338	655.57	76.8425	231.725	9.80408	197.576	4.61116	222.469	12.2621	202.74	4.33	202.74	4.33	14.7368	Concordia age
WK-16-15	11.728	215.063	297.963	0.721777	0.0539926	0.00193053	0.212965	0.00854197	0.0285805	0.000587919	0.512859	0.00933431	0.00031948	372.275	81.4725	196.038	7.1518	181.658	3.68597	187.792	6.39768			181.658	3.68597	7.33521	6/8 age
WK-16-16	10.6078	121.582	323.305	0.376059	0.0584794	0.00307941	0.230752	0.0122947	0.0293135	0.000881891	0.564643	0.0100372	0.000479322	546.33	114.797	210.819	10.1443	186.25	5.52405	201.864	9.5919	189.41	5.38	189.41	5.38	11.6541	Concordia age
WK-16-17	23.5647	346.666	600.396	0.577395	0.0541404	0.0017331	0.227337	0.00808141	0.030314	0.000570811	0.529703	0.0103235	0.00030939	375.98	76.845	207.998	6.6873	192.513	3.57293	207.591	6.18957			192.513	3.57293	7.44476	6/8 age
WK-16-18	23.0285	366.193	534.885	0.68462	0.0668731	0.0017888	0.278796	0.00802385	0.0302695	0.000552509	0.634218	0.0114057	0.00038017	835.18	56.325	249.702	6.37332	192.235	3.45862	229.229	7.59742	195.53	3.47	195.53	3.47	23.0144	Concordia age
WK-16-2	18.1399	322.178	485.417	0.663714	0.05662	0.00179176	0.221166	0.00756889	0.0283068	0.000625275	0.645455	0.00988294	0.000353154	475.97	70.3625	202.879	6.29494	179.942	3.92103	198.776	7.06818	182.89	3.86	182.89	3.86	11.3058	Concordia age
WK-16-20	22.2427	339.262	370.209	0.916406	0.0637312	0.00266023	0.336339	0.0129611	0.0385028	0.00070871	0.477651	0.0134445	0.000382546	731.49	88.88	294.394	9.8502	243.546	4.40122	269.932	7.62953	250.78	4.13	250.78	4.13	17.272	Concordia age
WK-16-21	44.7122	187.01	959.93	0.194816	0.0665583	0.00161733	0.375535	0.00938201	0.0408698	0.000717893	0.703093	0.0230534	0.00075554	833.33	50.7675	323.748	6.92904	258.222	4.44831	460.671	14.927	268.09	4.37	268.09	4.37	20.2398	Concordia age
WK-16-22	469.067	157.368	1026.52	0.153303	0.147578	0.00239212	8.24666	0.173694	0.402052	0.0075678	0.893679	0.122733	0.0026495	2318.21	23.15	2258.48	19.1352	2178.48	34.8155	2339.88	47.6981			2318.21	23.15	6.0275	7/6 age
WK-16-24	20.3365	292.207	590.145	0.495145	0.0524532	0.00152694	0.206629	0.00635207	0.0282934	0.000524375	0.602883	0.0091485	0.000264093	305.615	64.8075	190.72	5.34686	179.859	3.28876	184.071	5.28952			179.859	3.28876	5.69501	6/8 age
WK-16-25	13.2934	255.037	316.947	0.804667	0.0525147	0.00220162	0.217952	0.00906898	0.0300644	0.000654905	0.523515	0.00998105	0.000361626	309.32	128.69	200.204	7.56186	190.951	4.09987	200.739	7.23703			190.951	4.09987	4.62168	6/8 age
WK-16-26	20.2536	394.514	487.014	0.810067	0.0552194	0.00167838	0.223583	0.00718201	0.0291781	0.000603946	0.644367	0.00940925	0.00028424	420.42	68.5125	204.887	5.96158	185.402	3.78423	189.293	5.69158			185.402	3.78423	9.51011	6/8 age
WK-16-27	80.6517	511.328	1889.41	0.270628	0.0573184	0.00124021	0.310351	0.00678372	0.0389253	0.000765846	0.900108	0.0137018	0.00037168	505.595	48.1425	274.453	5.25997	246.168	4.75384	275.063	7.41094			246.168	4.75384	10.306	6/8 age
WK-16-28	56.0664	327.147	1413.28	0.231481	0.0538844	0.00127312	0.277973	0.00657715	0.0370303	0.00072819	0.831097	0.0139181	0.000410075	364.87	49.07	249.049	5.22846	234.399	4.52836	279.377	8.17476			234.399	4.52836	5.88212	6/8 age
WK-16-29	192.531	184.801	492.248	0.375423	0.113681	0.00246396	5.22017	0.12558	0.328282	0.00704572	0.892162	0.0930848	0.0025541	1858.95	38.89	1855.91	20.5385	1830.05	34.2086	1798.96	47.2279			1858.95	38.89	1.55474	7/6 age
WK-16-3	5.85537	87.0748	149.542	0.582277	0.0551588	0.00313539	0.213237	0.0112909	0.028355	0.000613849	0.408852	0.0106312	0.000520245	420.42	127.765	196.266	9.45054	180.245	3.84924	213.745	10.4047			180.245	3.84924	8.16289	6/8 age
WK-16-30	45.6573	555.3	893.666	0.621373	0.0653632	0.00186262	0.344563	0.0105502	0.0375229	0.000792302	0.689609	0.0144072	0.000523953	787.04	65.735	300.624	7.96987	237.461	4.92446	289.124	10.4398	243.97	4.91	243.97	4.91	21.0106	Concordia age
WK-16-32	10.6339	126.129	294.115	0.428843	0.0614663	0.0026706	0.251859	0.0115013	0.0294229	0.000767632	0.571318	0.0119911	0.000604652	657.42	92.5775	228.085	9.33002	186.935	4.8081	240.925	12.0765	189.96	4.79	189.96	4.79	18.0416	Concordia age
WK-16-33	107.566	654.697	2636.06	0.248362	0.0566212	0.00129291	0.295663	0.00683248	0.0373702	0.000745954	0.863783	0.0150507	0.000454551	475.97	47.2175	263.007	5.35746	236.512	4.63726	301.941	9.05125			236.512	4.63726	10.074	6/8 age
WK-16-34	58.6391	255.858	1435.24	0.178268	0.0554562	0.0014001	0.303459	0.00740027	0.0392098	0.000738834	0.77269	0.0147547	0.000478475	431.53	57.4025	269.098	5.76765	247.933	4.58508	296.046	9.53043			247.933	4.58508	7.8654	6/8 age
WK-16-36	40.467	234.242	612.095	0.382688	0.0576236	0.00151135	0.453268	0.0121281	0.0563501	0.00101028	0.670051	0.0197493	0.000557257	516.705	57.4025	379.565	8.47774	353.391	6.16823	395.286	11.0453			353.391	6.16823	6.89593	6/8 age
WK-16-37	384.537	218.099	966.247	0.225718	0.122108	0.00207609	6.07015	0.131054	0.353942	0.00639118	0.83637	0.111275	0.00261122	1987.35	25.15	1985.97	18.8697	1953.4	30.4481	2132.54	47.4938			1987.35	25.15	1.70852	7/6 age
WK-16-38	14.6416	169.659	364.655	0.465259	0.0583184	0.00230122	0.254103	0.00935688	0.0316829	0.000648197	0.5556	0.0123728	0.000479744	542.63	89.8	229.904	7.5774	201.072	4.05168	248.547	9.57819	206.18	3.79	206.18	3.79	12.5408	Concordia age
WK-16-4	35.6399	233.28	888.954	0.26242	0.058977	0.00144039	0.302959	0.00755713	0.0373338	0.000750922	0.806341	0.0148392	0.000699086	564.85	49.065	268.708	5.89203	236.285	4.66828	297.73	13.9235	245.61	4.39	245.61	4.39	12.0663	Concordia age
WK-16-40	45.7571	546.426	1450.32	0.376762	0.0534293	0.00124163	0.20411	0.0047833	0.027487	0.000500679	0.777265	0.00940477	0.000268812	346.35	51.8475	188.598	4.03562	174.801	3.14266	189.203	5.38267			174.801	3.14266	7.31545	6/8 age
WK-16-41	17.8967	276.52	508.177	0.54414	0.056049	0.0022933	0.209858	0.00865393	0.0270021	0.000616532	0.553696	0.00982442	0.000392792	453.75	90.7325	193.434	7.26407	171.758	3.87104	197.604	7.86197	174.49	3.77	174.49	3.77	11.2058	Concordia age
WK-16-44	199.515	117.631	555.249	0.211854	0.121147	0.00232089	5.5407	0.123626	0.327524	0.0056805	0.777317	0.0782244	0.00229563	1973.15	34.255	1906.93	19.2356	1826.37	27.602	1522.3	43.0335			1973.15	34.255	7.43894	7/6 age
WK-16-45	7.6108	119.202	173.908	0.685431	0.071843	0.00439632	0.295331	0.0171179	0.0302019	0.000822368	0.469776	0.0126173	0.000771907	983.335	125.155	262.747	13.4196	191.812	5.14695	253.427	15.4076	197.99	5.01	197.99	5.01	26.9975	Concordia age
WK-16-46	117.641	58.6332	317.673	0.184571	0.11283	0.00233416	5.34201	0.131107	0.340088	0.0068416	0.819681	0.105699	0.00311392	1855.56	37.0375	1875.61	21.0295	1887.09	32.9269	2030.88	56.9227			1855.56	37.0375	-1.69925	7/6 age
WK-16-47	203.409	188.651	605.894	0.31136	0.11368	0.00223763	4.77228	0.125986	0.301762	0.00709067	0.890079	0.0872315	0.00248037	1858.95	30.4	1780.04	22.1947	1700.04	35.1255	1690.44	46.1115			1858.95	30.4	8.54842	7/6 age
WK-16-48	26.0811	274.039	756.501	0.362245	0.0573016	0.00210393	0.23745	0.00826496	0.0300929	0.000738148	0.70471	0.0116541	0.000648553	501.89	81.47	216.331	6.78336	191.13	4.62055	234.193	12.9577	197.33	4.28	197.33	4.28	11.6491	Concordia age
WK-16-49	248.869	170.903	657.847	0.259792	0.112616	0.00202132	5.318	0.128183	0.338954	0.00733829	0.898197	0.108328	0.00274606	1842.6	33.49	1871.76	20.6399	1881.64	35.3449	2078.88	50.079			1842.6	33.49	-2.11881	7/6 age
WK-16-53	184.727	70.6767	524.451	0.134763	0.113486	0.00192837	5.29251	0.108605	0.334273	0.00620719	0.904914	0.0992268	0.00240182	1857.41	31.0225	1867.66	17.5708	1859.06	30.0063	1912.22	44.164			1857.41	31.0225	-0.0888125	7/6 age
WK-16-54	20.3298	185.034	445.995	0.41488	0.0654684	0.00299234	0.335904	0.0119925	0.0377221	0.00112759	0.837257	0.0137101	0.000590149	790.74	91.66	294.063	9.11739	238.698	7.00586	275.23	11.7669	258.22	5.75	258.22	5.75	18.8277	Concordia age
WK-16-55	342.858	36.9664	897.83	0.0411731	0.131159	0.00343254	7.07352	0.334064	0.37216	0.00948371	0.539577	0.126721	0.00531818	2113.27	40.5875	2120.72	42.039	2039.56	44.5681	2411.55	95.4029			2113.27	40.5875	3.48807	7/6 age
WK-16-57	197.718	208.344	538.348	0.387007	0.109524	0.00200487	4.62977	0.0975225	0.303206	0.00618571	0.968516	0.0952742	0.00259015	1791.66	33.335	1754.65	17.6295	1707.19	30.612	1839.41	47.7987			1791.66	33.335	4.71508	7/6 age
WK-16-6	69.9685	103.271	169.074	0.610804	0.129565	0.0029469	5.30771	0.145932	0.295396	0.00681758	0.839428	0.0924844	0.00303589	2092.28	40.125	1870.11	23.5258	1668.44	33.939	1787.86	56.1676	1842.7	25.6	1842.7	25.6	20.2575	Concordia age
WK-16-61	390.963	482.132	1152.96	0.418171	0.130713	0.00262219	5.59289	0.251508	0.298928	0.0124057	0.922871	0.0994106	0.00292493	2109.26	35.185	1915	38.757	1685.99	61.5748	1915.6	53.7737	2065.7	29.2	2065.7	29.2	20.0671	Concordia age
WK-16-62	13.68	193.397	332.397	0.581827	0.0645816	0.00307914	0.271295	0.0126051	0.0302297	0.000827648	0.589259	0.0115452	0.000533318	761.115	99.99	243.728	10.0691	191.986	5.17984	232.017	10.6565	198.29	5.05	198.29	5.05	21.2296	Concordia age
WK-16-64	267.89	208.767	648.343	0.322	0.114764	0.00200844	5.80597	0.129931	0.361746	0.00755592	0.933355	0.108082	0.0029079	1876.24	31.48	1947.3	19.4296	1990.44	35.7854	2074.39	53.0422			1876.24	31.48	-6.08677	7/6 age
WK-16-65	19.0494	397.666	448.994	0.885682	0.0606202	0.00218424	0.233574	0.00837644	0.0277975	0.000579768	0.581584	0.0100156	0.000326134	633.35	77.765	213.144	6.89637	176.749	3.6376	201.431	6.52654	181.18	3.55	181.18	3.55	17.0755	Concordia age
WK-16-66	5.59186	58.348	152.536	0.382518	0.0674876	0.0039206	0.291016	0.0193227	0.0307472	0.000979975	0.48002	0.0138988	0.00095995	853.7	120.365	259.359	15.1983	195.223	6.12979	278.99	19.1367	191.78	6.12	191.78	6.12	24.7287	Concordia age
WK-16-67	13.1294	218.964	316.663	0.691475	0.0569628	0.00210252	0.239317	0.00921592	0.0300928	0.000551833	0.47619	0.0103291	0.000329878	500.04	81.4725	217.861	7.55214	191.129	3.45496	207.704	6.5994	192.76	3.43	192.76	3.43	12.2703	Concordia age
WK-16-68	8.49447	137.746	214.515	0.642128	0.0692552	0.00375521	0.269212	0.0128995	0.0285076	0.000684593	0.501178	0.0103707	0.000480009	905.555	111.88	242.064	10.3211	181.201	4.29196	208.535	9.60247	190.03	3.96	190.03	3.96	25.1431	Concordia age
WK-16-7	17.9676	207.574	318.026	0.652695	0.0711951	0.00266569	0.380616	0.0147897	0.0387312	0.000898644	0.597113	0.0149998	0.000560886	964.81	77.0125	327.491	10.8794	244.963	5.5786	300.928	11.1692	250.32	5.58	250.32	5.58	25.2001	Concordia age
WK-16-70	42.1596	670.281	652.84	1.02671	0.0672329	0.00210316	0.370552	0.0119279	0.0396408	0.000891498	0.698657	0.0143994	0.0004096	855.55	60.185	320.062	8.83954	250.606	5.5295	288.969	8.16141	260.02	5.45	260.02	5.45	21.701	Concordia age
WK-16-72	24.0119	344.823	644.764	0.534805	0.0520476	0.00159142	0.22156	0.00710937	0.0306275	0.00061755	0.628379	0.0105196	0.000307652	287.1	74.99	203.208	5.91105	194.474	3.86411	211.515	6.15359			194.474	3.86411	4.29767	6/8 age
WK-16-73	419.598	110.236	1246.49	0.0884378	0.129026	0.00252903	5.8207	0.136153	0.322673	0.00621156	0.822975	0.0971459	0.00344895	2084.87	35.34	1949.5	20.3121	1802.77	30.2894	1873.92	63.5385	1934.1	21.4	1934.1	21.4	13.5308	Concordia age
WK-16-74	81.8843	678.29	2140.17	0.316933	0.0575655	0.00143973	0.287496	0.00767505	0.0361521	0.00082926	0.859226	0.0130514	0.000478211	522.26	55.55	256.586	6.05544	228.938	5.16072	262.091	9.54119	237.98	4.84	237.98	4.84	10.7756	Concordia age
WK-16-76	83.7937	637.717	2044.2	0.311964	0.0587658	0.00151997	0.301793	0.00857018	0.036853	0.000772401	0.738055	0.0143436	0.000464174	566.7	55.545	267.8	6.68712	233.297	4.80389	287.856	9.24933	239.71	4.7	239.71	4.7	12.8838	Concordia age
WK-16-78	13.4251	196.397	345.817	0.567922	0.0706393	0.00303439	0.281895	0.0117202	0.0290707	0.000640007	0.52952	0.012839	0.000511481	946.29	87.505	252.159	9.28507	184.729	4.01044	257.854	10.2071	190.49	3.94	190.49	3.94	26.7411	Concordia age
WK-16-79	59.8328	52.1599	1187.35	0.0439297	0.074753	0.00241651	0.514025	0.0245811	0.0486847	0.00154671	0.664355	0.0825302	0.00323168	1061.12	65.125	421.152	16.4878	306.441	9.50931	1602.85	60.3395	276.98	9.22	276.98	9.22	27.2374	Concordia age
WK-16-8	32.0437	254.291	723.097	0.35167	0.0563953	0.00134475	0.306407	0.0083586	0.0391827	0.00065113	0.609171	0.0133536	0.000361153	477.82	53.7	271.392	6.4992	247.765	4.0414	268.12	7.20351			247.765	4.0414	8.70598	6/8 age
WK-16-80	40.6083	857.529	855.011	1.00294	0.0612558	0.00191011	0.261611	0.00822475	0.0307495	0.000711242	0.735721	0.0107863	0.000354893	650.015	66.6575	235.965	6.62147	195.238	4.44943	216.848	7.09664	203.05	4.29	203.05	4.29	17.2597	Concordia age
WK-16-81	57.3098	352.442	1341.08	0.262804	0.0582059	0.00131039	0.324186	0.00832085	0.0398302	0.000725795	0.709951	0.0153804	0.000556081	538.925	49.9925	285.118	6.38335	251.78	4.50161	308.505	11.0694	256.88	4.45	256.88	4.45	11.6925	Concordia age
WK-16-82	58.1603	463.71	1428.04	0.324717	0.0579196	0.00140607	0.291132	0.00768284	0.0360046	0.000656655	0.691111	0.0132064	0.00035273	527.815	58.325	259.45	6.04458	228.02	4.08781	265.183	7.03654	233.1	4.01	233.1	4.01	12.1142	Concordia age
WK-16-84	62.2322	386.248	1441.12	0.268019	0.0561084	0.00118779	0.315386	0.0071963	0.0401971	0.000686358	0.748322	0.0143194	0.000412139	457.45	46.29	278.347	5.55825	254.055	4.25578	287.375	8.21265			254.055	4.25578	8.72732	6/8 age
WK-16-85	88.4477	906.454	1872.24	0.484155	0.052741	0.00112908	0.295218	0.00711827	0.0401982	0.0008377	0.86427	0.0130137	0.000322164	316.725	15.74	262.658	5.58321	254.062	5.19328	261.34	6.42799			254.062	5.19328	3.27284	6/8 age
WK-16-86	57.2483	360.241	1328.66	0.271132	0.0539489	0.00123956	0.308014	0.00780602	0.0409779	0.000835066	0.804102	0.0139205	0.000382743	368.57	51.8475	272.64	6.06248	258.892	5.17316	279.424	7.62988			258.892	5.17316	5.04274	6/8 age
WK-16-90	21.2534	316.942	601.854	0.526609	0.0724452	0.00370673	0.266051	0.0124878	0.0263956	0.000654287	0.5281	0.010149	0.000482731	998.15	99.5375	239.532	10.0166	167.95	4.11033	204.099	9.65904	175.79	3.94	175.79	3.94	29.8839	Concordia age
WK-16-91	24.1386	348.816	610.513	0.571349	0.056728	0.00251078	0.24264	0.0116018	0.0306487	0.000662659	0.452183	0.0106809	0.000396132	479.67	93.51	220.58	9.48126	194.607	4.14608	214.739	7.92209	195.16	4.15	195.16	4.15	11.775	Concordia age
WK-16-92	26.7236	353.469	521.038	0.678393	0.0522982	0.0016971	0.282891	0.00906586	0.0389849	0.000794132	0.635633	0.0132541	0.00043507	298.21	69.4375	252.949	7.17751	246.538	4.92901	266.135	8.67871			246.538	4.92901	2.53433	6/8 age
WK-16-93	6.78167	108.91	175.58	0.620289	0.0499797	0.00264793	0.197326	0.00922922	0.0292541	0.000714612	0.522278	0.0100659	0.000503519	194.525	128.685	182.861	7.82776	185.878	4.47688	202.438	10.0758			185.878	4.47688	-1.65026	6/8 age
WK-16-94	29.7718	358.04	816.009	0.43877	0.057513	0.00177752	0.235831	0.00688539	0.0297842	0.000643456	0.739957	0.0109665	0.000341513	522.26	67.43	215.001	5.65906	189.197	4.02931	220.451	6.82786	196.05	3.71	196.05	3.71	12.0017	Concordia age
WK-16-96	52.9489	570.572	1061.68	0.537425	0.0500409	0.00119386	0.290111	0.00854221	0.0415046	0.000873375	0.714658	0.0140151	0.000399042	198.23	55.545	258.646	6.72546	262.152	5.40763	281.31	7.95406			262.152	5.40763	-1.35542	6/8 age
WK-16-97	19.0241	345.603	437.591	0.789784	0.0640999	0.00253373	0.262098	0.0091479	0.0299242	0.000593866	0.5686	0.0103578	0.000320916	746.3	84.4075	236.356	7.36143	190.074	3.71849	208.278	6.41993	198.64	3.4	198.64	3.4	19.5815	Concordia age
WK-16-98	77.9819	619.723	1481.96	0.418178	0.0710597	0.00193709	0.411979	0.0105587	0.0420146	0.000777647	0.722182	0.0177293	0.000514495	958.95	55.555	350.299	7.59671	265.309	4.81304	355.209	10.2179	281.39	4.61	281.39	4.61	24.2623	Concordia age
WK-16-99	50.8709	308.291	470.5	0.655241	0.0716611	0.00231711	0.774909	0.0267489	0.0777441	0.00149812	0.558246	0.0271633	0.000683696	975.93	66.67	582.575	15.3075	482.643	8.96466	541.707	13.4536	491.98	8.96	491.98	8.96	17.1534	Concordia age
	WK-18 (n=86) (1°08′15.3″ N, 109°28′48.9″ E)
Spot	Pb(ppm)	Th(ppm)	U(ppm)	Th/U	U-Th-Pb ratios									Ages (Ma)										Inferred Age (Ma)	1σ	Discodance (%)	Notes
					207Pb/206Pb	1σ	207Pb/235U	1σ	206Pb/238U	1σ	Rho	208Pb/232Th	1σ	207Pb/206Pb	1σ	207Pb/235U	1σ	206Pb/238U	1σ	208Pb/232Th	1σ	Conc age	1σ
WK-18-1	54.9156	476.103	1156.8	0.411568	0.0607474	0.00155416	0.326586	0.00807105	0.039297	0.000856672	0.882108	0.0153802	0.000479028	631.5	53.6925	286.956	6.18075	248.474	5.31535	308.502	9.53557	262.27	4.83	262.27	4.83	13.4103	Concordia age
WK-18-10	36.2874	209.322	944.751	0.221563	0.0612421	0.00203812	0.311871	0.0113514	0.0366726	0.000683826	0.512306	0.0133015	0.000627919	655.57	70.3575	275.63	8.78795	232.175	4.25413	267.081	12.525	233.37	4.27	233.37	4.27	15.7658	Concordia age
WK-18-100	27.5163	389.109	845.518	0.460202	0.0579078	0.00174899	0.207599	0.00645868	0.0259733	0.000512131	0.633777	0.00939982	0.000335144	527.815	66.66	191.536	5.4322	165.297	3.21907	189.104	6.71092	168.93	3.14	168.93	3.14	13.6993	Concordia age
WK-18-101	16.3071	127.19	387.245	0.328449	0.0517096	0.00178904	0.27296	0.00926443	0.0386486	0.000910977	0.694472	0.0135383	0.000502424	272.285	79.6175	245.058	7.39169	244.451	5.65556	271.803	10.0195			244.451	5.65556	0.247675	6/8 age
WK-18-102	278.894	311.299	748.798	0.415732	0.122813	0.00432438	5.17812	0.20306	0.321708	0.0145929	0.864514	0.0966705	0.00257575	1998.15	57.245	1849.03	33.3969	1798.07	71.1812	1865.16	47.4725			1998.15	57.245	10.0135	7/6 age
WK-18-103	14.458	152.495	226.82	0.672315	0.0701614	0.00266011	0.440073	0.015296	0.046035	0.00092772	0.579797	0.0165448	0.000627122	933.02	77.78	370.304	10.788	290.133	5.71942	331.672	12.4692	303.6	5.38	303.6	5.38	21.6501	Concordia age
WK-18-104	253.62	244.362	653.454	0.373954	0.122562	0.0034254	5.46669	0.151844	0.323053	0.00589468	0.65692	0.0927233	0.00305883	1994.44	49.6875	1895.38	23.877	1804.62	28.7376	1792.28	56.5795			1994.44	49.6875	9.5176	7/6 age
WK-18-105	58.8233	53.3596	169.385	0.31502	0.119386	0.00264226	5.01664	0.125751	0.303749	0.00607687	0.798115	0.0948875	0.00351526	1947.22	39.97	1822.13	21.2582	1709.87	30.0614	1832.27	64.8937	1801.2	21.8	1801.2	21.8	12.1893	Concordia age
WK-18-107	48.8224	717.903	1206.69	0.594936	0.0732676	0.00206945	0.316368	0.0105278	0.0312353	0.000834316	0.802679	0.0108491	0.000530127	1021.29	56.33	279.105	8.12282	198.275	5.21654	218.104	10.6001	199.61	5.31	199.61	5.31	28.9605	Concordia age
WK-18-108	16.2016	231.539	286.786	0.807358	0.0520202	0.00200048	0.293674	0.0109391	0.0413516	0.000875911	0.568661	0.0126318	0.000451252	287.1	88.875	261.447	8.58772	261.206	5.4241	253.718	9.00704			261.206	5.4241	0.0925141	6/8 age
WK-18-110	226.588	73.5349	693.59	0.106021	0.117763	0.00294171	5.40119	0.172254	0.335743	0.0107341	1.00249	0.0728296	0.00400672	1924.08	44.7525	1885.04	27.3536	1866.16	51.8136	1420.91	75.487			1924.08	44.7525	3.01005	7/6 age
WK-18-12	301.342	35.5978	939.02	0.0379095	0.115391	0.00241108	5.20274	0.120469	0.325545	0.00608974	0.807875	0.120825	0.00503557	1887.04	38.1175	1853.06	19.7609	1816.75	29.632	2305.52	90.8081			1887.04	38.1175	3.72475	7/6 age
WK-18-13	71.4383	47.0192	179.664	0.261707	0.153642	0.00323806	7.28461	0.196124	0.340989	0.00720728	0.785065	0.108341	0.00375352	2386.73	41.51	2146.93	24.0818	1891.43	34.662	2079.12	68.4509	2115.9	27.3	2115.9	27.3	20.7524	Concordia age
WK-18-14	65.7614	130.146	1810.19	0.0718967	0.0594547	0.0015534	0.303158	0.00860843	0.0367044	0.000627407	0.601972	0.0239517	0.0014489	583.36	55.545	268.864	6.70993	232.373	3.90335	478.411	28.6004	235.71	3.88	235.71	3.88	13.5724	Concordia age
WK-18-16	14.5323	213.896	392.968	0.544308	0.0522005	0.00169682	0.210478	0.00727899	0.0291384	0.000565616	0.561296	0.0106825	0.000392886	294.505	75.915	193.954	6.10725	185.154	3.54437	214.773	7.85716			185.154	3.54437	4.5373	6/8 age
WK-18-17	46.3586	851.741	1325.43	0.642615	0.0631103	0.00199181	0.222972	0.00676141	0.0257069	0.000599168	0.768622	0.00896679	0.000274016	722.23	67.43	204.381	5.61544	163.623	3.76672	180.431	5.48925	172.23	3.59	172.23	3.59	19.942	Concordia age
WK-18-18	162.544	155.247	398.967	0.389121	0.11742	0.00210505	5.33294	0.11628	0.327168	0.00608828	0.853461	0.105209	0.00278524	1917.59	32.5625	1874.16	18.6872	1824.64	29.5888	2021.93	50.9369			1917.59	32.5625	4.84725	7/6 age
WK-18-2	14.5336	216.69	444.973	0.486973	0.0538133	0.00213064	0.196112	0.00738102	0.0267618	0.000566092	0.562029	0.00999721	0.000437864	364.87	88.88	181.831	6.26699	170.249	3.55534	201.062	8.76261			170.249	3.55534	6.3693	6/8 age
WK-18-20	69.3391	894.255	1963.75	0.455382	0.0709842	0.00253876	0.267369	0.00766037	0.0280046	0.000597655	0.744873	0.0109049	0.00033144	966.665	72.2225	240.588	6.13947	178.048	3.74901	219.219	6.62687	194.2	3.25	194.2	3.25	25.9947	Concordia age
WK-18-21	59.6861	819.84	1292.68	0.634216	0.057841	0.0014186	0.278991	0.00830081	0.0347574	0.000725961	0.701997	0.0127102	0.00036679	524.11	49.07	249.857	6.59215	220.255	4.52421	255.282	7.32059	222.9	4.53	222.9	4.53	11.8476	Concordia age
WK-18-22	313.242	86.9447	911.964	0.0953378	0.122351	0.00227824	5.60702	0.135291	0.329909	0.00691907	0.869195	0.115289	0.00721278	1991.05	38.115	1917.18	20.8327	1837.94	33.5532	2205.43	130.716			1991.05	38.115	7.68997	7/6 age
WK-18-23	68.8382	95.9205	157.384	0.609468	0.113822	0.00254629	5.16478	0.137555	0.327212	0.00676802	0.776616	0.103682	0.00301162	1861.42	40.895	1846.83	22.6911	1824.86	32.8877	1993.97	55.1532			1861.42	40.895	1.96459	7/6 age
WK-18-24	400.843	335.2	1098.89	0.305034	0.11509	0.00221913	4.98573	0.111278	0.312144	0.00601862	0.863894	0.0967751	0.0026429	1881.17	35.3375	1816.9	18.9169	1751.25	29.5839	1867.09	48.7054			1881.17	35.3375	6.90631	7/6 age
WK-18-25	78.2535	579.368	1906.6	0.303874	0.0625107	0.00150443	0.309522	0.00877389	0.0356233	0.000755063	0.747736	0.0148039	0.000474882	700.01	51.8475	273.81	6.80568	225.647	4.7016	297.027	9.4584	230.34	4.72	230.34	4.72	17.5901	Concordia age
WK-18-26	19.8283	607.907	283.963	2.1408	0.0621791	0.00301823	0.265672	0.0139838	0.0306998	0.000672289	0.416047	0.0103793	0.000347736	679.64	108.317	239.228	11.2197	194.926	4.20609	208.707	6.95631	194.37	4.21	194.37	4.21	18.5185	Concordia age
WK-18-27	24.3142	235.971	492.558	0.479073	0.0495162	0.00158487	0.27867	0.00958504	0.0405335	0.000837082	0.600414	0.0152584	0.000624163	172.305	80.5425	249.602	7.61331	256.139	5.18782	306.077	12.4261			256.139	5.18782	-2.61891	6/8 age
WK-18-28	21.1705	174.872	409.238	0.427311	0.0626912	0.00290439	0.361166	0.0176233	0.0414571	0.000830293	0.410441	0.0165526	0.000767127	698.16	99.9875	313.085	13.1481	261.859	5.14129	331.825	15.2529	262.87	5.15	262.87	5.15	16.3618	Concordia age
WK-18-29	47.7267	340.673	1228.97	0.277203	0.0601902	0.00158514	0.292556	0.00804395	0.0350763	0.000650191	0.674164	0.0125275	0.000422921	609.28	55.545	260.569	6.32151	222.241	4.05114	251.636	8.4424	228.24	3.96	228.24	3.96	14.7093	Concordia age
WK-18-3	103.576	1477.3	3340.65	0.442219	0.0660484	0.00272682	0.235223	0.00874995	0.0259118	0.000527819	0.547598	0.00868542	0.000244823	809.26	85.95	214.501	7.19415	164.91	3.3178	174.794	4.90581	172.35	3.11	172.35	3.11	23.119	Concordia age
WK-18-30	32.0407	213.19	220.302	0.967717	0.0639826	0.00178793	0.814479	0.0232681	0.092507	0.00202339	0.765639	0.0319574	0.000917533	742.6	59.255	604.964	13.0273	570.347	11.9431	635.824	17.9711			570.347	11.9431	5.72216	6/8 age
WK-18-31	63.9422	283.471	206.078	1.37555	0.0960232	0.00229871	2.19404	0.0574579	0.164301	0.0030264	0.703365	0.0557812	0.00146347	1550.01	44.7525	1179.15	18.2834	980.635	16.7647	1097.14	28.0171	1041.4	16.5	1041.4	16.5	16.8355	Concordia age
WK-18-33	145.178	748.373	4081.34	0.183365	0.0683165	0.00131229	0.318442	0.00855515	0.0334918	0.000788836	0.876701	0.0134189	0.000605698	879.63	38.89	280.703	6.59142	212.365	4.92171	269.421	12.0804	210.33	5.07	210.33	5.07	24.3454	Concordia age
WK-18-36	219.824	251.668	679.866	0.370174	0.115988	0.00245084	4.53169	0.110053	0.280499	0.00596395	0.875507	0.0570033	0.00246286	1895.37	37.81	1736.81	20.2356	1593.87	30.0367	1120.52	47.0954	1719.3	21.2	1719.3	21.2	15.9069	Concordia age
WK-18-37	16.2284	55.274	127.158	0.434687	0.0681383	0.0026927	0.953527	0.0334795	0.102664	0.0022544	0.625409	0.0361044	0.00150162	872.215	82.56	679.937	17.4078	630.004	13.1841	716.885	29.2935			630.004	13.1841	7.34377	6/8 age
WK-18-39	273.733	107.575	698.335	0.154045	0.121969	0.00261461	6.18835	0.157502	0.364368	0.00791629	0.853634	0.103408	0.00333735	1987.04	43.36	2002.8	22.2894	2002.84	37.4188	1988.96	61.1336			1987.04	43.36	-0.79536	7/6 age
WK-18-4	67.2506	405.332	1765.68	0.229561	0.0617724	0.00142951	0.304328	0.00739747	0.0357121	0.000657569	0.757504	0.0155559	0.00048286	664.83	49.995	269.775	5.76165	226.2	4.09462	311.999	9.61018	234.81	3.98	234.81	3.98	16.1526	Concordia age
WK-18-40	25.4845	401.053	617.932	0.649025	0.0614384	0.00248227	0.247385	0.00930269	0.0292233	0.000602636	0.54839	0.0112503	0.000441371	653.72	87.0225	224.449	7.57401	185.685	3.77587	226.123	8.82185	191.67	3.57	191.67	3.57	17.2707	Concordia age
WK-18-41	100.898	110.788	285.239	0.388405	0.118701	0.00287859	4.93989	0.132304	0.29856	0.00614076	0.767952	0.0713678	0.00247325	1936.73	42.4375	1809.1	22.6499	1684.16	30.498	1393.35	46.6598	1777.2	23	1777.2	23	13.0409	Concordia age
WK-18-42	13.697	204.018	378.272	0.539342	0.0533471	0.00210183	0.20601	0.00827573	0.0279278	0.00066141	0.589544	0.0106635	0.000437147	342.65	90.7325	190.199	6.96883	177.566	4.14899	214.392	8.74249			177.566	4.14899	6.64198	6/8 age
WK-18-43	98.1338	2012.41	2216.58	0.907888	0.0559628	0.00132467	0.245578	0.007543	0.0314622	0.000808566	0.836702	0.0112364	0.000446255	450.045	51.845	222.978	6.15085	199.693	5.05451	225.847	8.91958			199.693	5.05451	10.4423	6/8 age
WK-18-45	65.715	392.646	782.713	0.501648	0.0558511	0.00130156	0.558089	0.0141888	0.0716485	0.00143132	0.785753	0.0222204	0.000602214	455.6	51.8475	450.282	9.25169	446.08	8.61333	444.207	11.9075			446.08	8.61333	0.933201	6/8 age
WK-18-46	24.3304	199.71	677.887	0.294606	0.0597582	0.0022137	0.279359	0.00932901	0.0337126	0.000744981	0.661729	0.0100785	0.000604411	594.47	74.9875	250.149	7.40607	213.743	4.64727	202.688	12.0946	222.36	4.23	222.36	4.23	14.554	Concordia age
WK-18-47	50.7708	422.142	1153.06	0.366105	0.0500246	0.00123745	0.272589	0.00704299	0.0391114	0.000767939	0.759932	0.0134568	0.000363434	194.525	26.8475	244.762	5.62198	247.323	4.766	270.177	7.24826			247.323	4.766	-1.04634	6/8 age
WK-18-48	15.1342	174.278	382.489	0.455643	0.0543649	0.00271765	0.245502	0.011732	0.0326455	0.00077225	0.495013	0.0121605	0.000481888	387.09	80.5475	222.916	9.5656	207.084	4.82216	244.308	9.623			207.084	4.82216	7.10186	6/8 age
WK-18-5	309.163	160.954	915.66	0.175779	0.116442	0.00206218	4.98716	0.0960168	0.30889	0.00471988	0.793658	0.0950646	0.00256694	1902.16	37.195	1817.15	16.3306	1735.24	23.2648	1835.54	47.3795			1902.16	37.195	8.77515	7/6 age
WK-18-52	13.6425	164.327	450.648	0.364646	0.0505093	0.00193431	0.189561	0.00690778	0.0271327	0.000562544	0.568949	0.00910398	0.000383348	216.74	88.875	176.254	5.89755	172.578	3.53183	183.179	7.6784			172.578	3.53183	2.08591	6/8 age
WK-18-53	644.236	388.228	2103.84	0.184533	0.118606	0.0022912	4.84137	0.125978	0.290699	0.00675419	0.8929	0.0774625	0.00226274	1935.5	33.7975	1792.12	21.9321	1645.02	33.7456	1508.01	42.447	1799.1	22.9	1799.1	22.9	15.0078	Concordia age
WK-18-54	394.535	165.484	1098.52	0.150642	0.114199	0.00229937	5.51551	0.129801	0.345646	0.00804026	0.988434	0.110338	0.0030574	1933.34	35.9525	1903.02	20.2696	1913.77	38.5313	2115.51	55.6559			1933.34	35.9525	1.01188	7/6 age
WK-18-55	221.316	82.3519	609.541	0.135105	0.118089	0.00247733	5.70133	0.129174	0.34492	0.00732827	0.937742	0.121613	0.0038301	1927.47	32.255	1931.57	19.6164	1910.3	35.1407	2319.71	69.021			1927.47	32.255	0.89131	7/6 age
WK-18-56	29.1301	240.286	650.03	0.369653	0.0505528	0.00153137	0.287546	0.00892879	0.0407521	0.000919506	0.72664	0.0130884	0.00048154	220.44	74.9875	256.626	7.04357	257.493	5.69711	262.83	9.60725			257.493	5.69711	-0.33796	6/8 age
WK-18-57	21.0315	191.326	441.439	0.433415	0.0697214	0.00398025	0.379119	0.0195471	0.0393006	0.00119112	0.587827	0.0136314	0.000928641	920.37	117.44	326.39	14.3934	248.496	7.38933	273.66	18.5175	261.36	6.93	261.36	6.93	23.8651	Concordia age
WK-18-58	26.4942	318.214	579.275	0.54933	0.0664229	0.00221495	0.303988	0.00961306	0.0329694	0.000742113	0.711793	0.0162181	0.00331118	820.37	68.515	269.51	7.48769	209.106	4.63265	325.174	65.8582	220.17	4.43	220.17	4.43	22.4127	Concordia age
WK-18-6	38.1438	198.187	853.818	0.232119	0.0535331	0.0014059	0.317246	0.00838272	0.0432123	0.000942795	0.825699	0.0158734	0.000554075	350.055	54.625	279.782	6.46452	272.714	5.82776	318.316	11.0241			272.714	5.82776	2.52644	6/8 age
WK-18-60	255.079	105.999	810.95	0.13071	0.112874	0.00209839	4.87993	0.110431	0.308411	0.00652812	0.935365	0.0985804	0.0027484	1845.99	33.18	1798.8	19.1091	1732.88	32.177	1900.33	50.5665			1845.99	33.18	6.12723	7/6 age
WK-18-61	36.5594	89.9535	1005.74	0.0894401	0.0516279	0.0013245	0.279713	0.00714399	0.0388087	0.000745018	0.75164	0.0147107	0.000670817	333.39	59.2525	250.43	5.67093	245.444	4.62517	295.17	13.3621			245.444	4.62517	1.99094	6/8 age
WK-18-62	76.4185	1371.46	1956.02	0.701152	0.0571696	0.00127107	0.263768	0.00732746	0.0330688	0.000859185	0.935269	0.00941003	0.000415383	498.19	45.365	237.699	5.88952	209.726	5.36256	189.308	8.31754	219.19	5.18	219.19	5.18	11.768	Concordia age
WK-18-63	67.8354	431.676	1495.38	0.288672	0.0725196	0.00181681	0.391033	0.0111272	0.0381935	0.000652509	0.600375	0.0186102	0.000916963	1011.11	50.005	335.124	8.12551	241.626	4.0537	372.697	18.1952	239.71	4.1	239.71	4.1	27.8995	Concordia age
WK-18-64	15.7773	157.544	368.509	0.427517	0.0508907	0.00171145	0.269455	0.00945496	0.0379034	0.000804051	0.60455	0.0113265	0.000426529	235.25	77.765	242.258	7.56442	239.824	4.99564	227.647	8.52456			239.824	4.99564	1.00468	6/8 age
WK-18-65	94.7197	134.217	237.65	0.564769	0.113358	0.00215238	4.94687	0.0989681	0.311606	0.00577082	0.925693	0.0872471	0.00244894	1854.02	33.7975	1810.29	16.9428	1748.61	28.3787	1690.73	45.5265			1854.02	33.7975	5.68573	7/6 age
WK-18-66	26.5894	479.612	705.583	0.679739	0.060775	0.00204692	0.231914	0.00789423	0.0273577	0.000538632	0.5784	0.00984769	0.000321426	631.5	67.58	211.777	6.50827	173.99	3.38109	198.07	6.43339	177.98	3.32	177.98	3.32	17.8429	Concordia age
WK-18-68	31.1047	361.247	583.538	0.619064	0.0586824	0.00214984	0.337216	0.0123707	0.0410866	0.000812237	0.538883	0.0156085	0.000893818	553.74	80.3875	295.06	9.39557	259.565	5.03133	313.045	17.7884	264.24	4.89	264.24	4.89	12.0298	Concordia age
WK-18-7	29.4887	470.933	512.1	0.919611	0.0544263	0.00171931	0.290868	0.00953204	0.0387567	0.000738278	0.581277	0.0132768	0.000407921	387.09	70.3625	259.242	7.49987	245.122	4.58359	266.588	8.13696			245.122	4.58359	5.44682	6/8 age
WK-18-70	127.205	47.3744	366.025	0.129429	0.114664	0.00248488	5.36531	0.124741	0.33369	0.00681716	0.878709	0.102681	0.0037537	1875.93	39.195	1879.33	19.9395	1856.24	32.9661	1975.63	68.8057			1875.93	39.195	1.0495	7/6 age
WK-18-71	15.3209	221.592	489.059	0.453098	0.0588887	0.00223901	0.214185	0.008264	0.0259556	0.000492138	0.491422	0.00927378	0.00038047	561.145	81.47	197.058	6.91221	165.186	3.09355	186.58	7.61949	167.54	3.06	167.54	3.06	16.1742	Concordia age
WK-18-73	75.3447	1396.91	1983.94	0.704111	0.0616323	0.00159816	0.284137	0.00976282	0.0327859	0.00084837	0.753096	0.0103076	0.000485394	661.125	55.55	253.934	7.72152	207.961	5.29652	207.273	9.71079	207.56	5.37	207.56	5.37	18.1044	Concordia age
WK-18-74	563.484	461.078	1553.04	0.296887	0.133019	0.00261309	5.60843	0.1275	0.301032	0.00580919	0.848855	0.0914676	0.00253319	2138.89	34.2625	1917.39	19.6337	1696.43	28.7982	1769.04	46.9106	1883.5	21.4	1883.5	21.4	20.6864	Concordia age
WK-18-75	69.9931	835.194	1582.16	0.527881	0.0552845	0.00131159	0.274969	0.00693584	0.0355704	0.000639138	0.712345	0.0120895	0.000339309	433.38	53.7	246.658	5.52624	225.317	3.98049	242.891	6.77627			225.317	3.98049	8.65206	6/8 age
WK-18-77	136.326	132.433	313.837	0.42198	0.122004	0.00234562	6.14741	0.139425	0.361338	0.00728715	0.889191	0.0954372	0.00254633	1987.04	34.72	1997.01	19.8537	1988.51	34.5239	1842.42	46.9831			1987.04	34.72	-0.0740935	7/6 age
WK-18-78	72.1806	517.846	1808.88	0.28628	0.0617807	0.00143806	0.303415	0.00718665	0.035408	0.000689182	0.821756	0.0149917	0.000443701	666.37	49.995	269.064	5.60151	224.307	4.29253	300.768	8.83573	235.69	4.09	235.69	4.09	16.6344	Concordia age
WK-18-79	17.4388	215.715	309.948	0.695971	0.0648407	0.00316354	0.356646	0.0162938	0.0398938	0.00096206	0.527853	0.0155029	0.000760294	768.52	107.552	309.707	12.1969	252.175	5.96547	310.944	15.1326	260.54	5.67	260.54	5.67	18.5765	Concordia age
WK-18-8	86.7426	1074.68	2510.69	0.428042	0.0628904	0.00205022	0.259653	0.0103045	0.0297044	0.0008072	0.684738	0.0100055	0.000406739	705.565	68.5125	234.387	8.30783	188.698	5.05446	201.229	8.13966	188.76	5.1	188.76	5.1	19.493	Concordia age
WK-18-80	58.2164	113.347	174.149	0.65086	0.121401	0.00268043	4.46379	0.105708	0.264931	0.00540259	0.861122	0.0564221	0.00208065	1976.86	38.885	1724.26	19.6796	1515.02	27.5451	1109.41	39.8085	1673.8	21	1673.8	21	12.1352	Concordia age
WK-18-81	21.3056	319.152	338.547	0.942709	0.0624951	0.00259783	0.362703	0.0182625	0.0413365	0.000807764	0.388099	0.0136495	0.000616682	700.01	89.65	314.231	13.6095	261.112	5.00247	274.02	12.2967	254.12	4.78	254.12	4.78	16.9045	Concordia age
WK-18-82	110.201	219.239	262.407	0.835492	0.112845	0.002418	4.5054	0.130757	0.286219	0.00669695	0.806205	0.0911981	0.00286475	1855.56	38.89	1731.97	24.1449	1622.61	33.5759	1764.05	53.0638	1724.5	25.4	1724.5	25.4	12.5543	Concordia age
WK-18-83	684.323	598.905	2721.6	0.220057	0.111898	0.00258843	3.57589	0.0947629	0.230323	0.00553143	0.906243	0.0617607	0.00227747	1831.48	42.13	1544.19	21.054	1336.19	28.9915	1211.29	43.3551	1500.7	23	1500.7	23	13.4699	Concordia age
WK-18-85	62.0872	864.895	1279.58	0.67592	0.0574345	0.00164266	0.292383	0.00921819	0.0366543	0.000779586	0.674598	0.011629	0.000352049	509.3	62.955	260.433	7.2446	232.061	4.84946	233.692	7.0339	236.32	4.77	236.32	4.77	10.8941	Concordia age
WK-18-86	170.877	46.742	498.386	0.0937868	0.114974	0.00269693	5.49182	0.166554	0.344329	0.00852476	0.816341	0.105678	0.00376413	1879.32	42.2825	1899.32	26.0826	1907.46	40.8915	2030.5	68.8098			1879.32	42.2825	-1.49732	7/6 age
WK-18-89	54.7188	473.806	1197.78	0.39557	0.055369	0.00147695	0.300048	0.00862604	0.0390548	0.000684113	0.609302	0.0135989	0.000375241	427.825	61.105	266.438	6.73967	246.972	4.24641	273.012	7.4827			246.972	4.24641	7.30603	6/8 age
WK-18-90	499.24	239.358	1407.78	0.170025	0.113964	0.00211272	5.13118	0.108194	0.32427	0.00540281	0.790181	0.0989883	0.00236043	1864.82	33.3325	1841.28	17.9617	1810.55	26.3185	1907.83	43.4123			1864.82	33.3325	2.91017	7/6 age
WK-18-91	26.5347	284.115	368.03	0.771987	0.0560027	0.00148932	0.409182	0.0126578	0.0527797	0.00116764	0.71515	0.0176764	0.000562326	453.75	59.255	348.286	9.12366	331.565	7.15196	354.158	11.1684			331.565	7.15196	4.80081	6/8 age
WK-18-92	24.2423	420.165	433.945	0.968245	0.0561882	0.00178767	0.278453	0.00850008	0.0360969	0.00068838	0.624724	0.012341	0.000383079	461.155	70.3625	249.43	6.75313	228.594	4.28476	247.913	7.64849			228.594	4.28476	8.35345	6/8 age
WK-18-93	12.6986	135.642	402.137	0.337302	0.061926	0.00234314	0.231529	0.00901864	0.0271219	0.000570773	0.540267	0.010753	0.000463046	672.235	81.47	211.46	7.43717	172.51	3.58349	216.183	9.25962	175.37	3.56	175.37	3.56	18.4197	Concordia age
WK-18-94	136.213	91.6882	349.183	0.262579	0.119075	0.0022944	5.67553	0.137666	0.343062	0.00654936	0.787056	0.111382	0.00306693	1942.29	33.49	1927.65	20.9808	1901.38	31.4523	2134.5	55.7769			1942.29	33.49	2.1062	7/6 age
WK-18-96	172.324	303.8	435.596	0.697435	0.116864	0.00228027	4.71096	0.0983685	0.291247	0.00516128	0.848692	0.0789071	0.00222893	1909.26	35.1875	1769.19	17.5308	1647.76	25.7825	1535.09	41.7567	1747.4	17.9	1747.4	17.9	13.6966	Concordia age
WK-18-97	66.2052	645.994	1745.71	0.370048	0.0551865	0.00143019	0.259281	0.0075432	0.0339338	0.000723555	0.732914	0.011066	0.000385785	420.42	57.4025	234.087	6.08431	215.122	4.51275	222.44	7.71223			215.122	4.51275	8.10174	6/8 age
WK-18-98	110.097	87.6132	1077.11	0.0813412	0.0970186	0.00196879	1.36037	0.04361	0.100442	0.00261897	0.813362	0.0476372	0.00325049	1568.52	38.1125	872.029	18.7695	617	15.3456	940.623	62.7121	539.6	16.7	539.6	16.7	29.2454	Concordia age
	WK-27 (n=102) (0°10′8″ S, 110°50′53″ E)
Spot	Pb(ppm)	Th(ppm)	U(ppm)	Th/U	U-Th-Pb ratios									Ages (Ma)										Inferred Age (Ma)	1σ	Discodance (%)	Notes
					207Pb/206Pb	1σ	207Pb/235U	1σ	206Pb/238U	1σ	Rho	208Pb/232Th	1σ	207Pb/206Pb	1σ	207Pb/235U	1σ	206Pb/238U	1σ	208Pb/232Th	1σ	Conc age	1σ
WK-27.2-1	85.2522	434.02	1317.04	0.329541	0.0625927	0.00133169	0.535781	0.0187331	0.0608771	0.00188414	0.885191	0.0162312	0.000650066	694.455	44.44	435.639	12.389	380.957	11.4508	325.435	12.9294	392.4	11.9	392.4	11.9	12.5521	Concordia age
WK-27.2-10	48.0651	127.996	688.808	0.185823	0.0547197	0.00121201	0.538996	0.0149957	0.0702855	0.0015612	0.798384	0.0205628	0.000664446	466.71	49.995	437.762	9.89819	437.875	9.40622	411.404	13.1593			437.875	9.40622	-0.0258061	6/8 age
WK-27.2-100	25.0933	124.978	940.986	0.132816	0.0519769	0.00157006	0.17588	0.00724356	0.0240052	0.000721096	0.729377	0.0204558	0.00120301	283.395	70.3625	164.509	6.25588	152.92	4.54026	409.285	23.8281			152.92	4.54026	7.04514	6/8 age
WK-27.2-101	12.5543	430.956	391.035	1.10209	0.0552461	0.00222126	0.155946	0.00630781	0.0203627	0.000458771	0.557005	0.00655405	0.00020906	420.42	88.88	147.149	5.54168	129.948	2.89926	132.04	4.19805	132.03	2.83	132.03	2.83	11.6897	Concordia age
WK-27.2-102	66.5372	130.606	1078.09	0.121146	0.0600984	0.0014003	0.555094	0.0257284	0.0649823	0.00251917	0.836404	0.038229	0.00124681	605.575	45.36	448.328	16.8019	405.854	15.2503	758.29	24.2729			405.854	15.2503	9.4738	6/8 age
WK-27.2-104	42.7944	262.051	943.261	0.277814	0.0520844	0.00149465	0.319585	0.0100031	0.0438497	0.000966322	0.704055	0.0135742	0.000450829	300.06	66.66	281.583	7.69949	276.651	5.9695	272.519	8.99023			276.651	5.9695	1.75154	6/8 age
WK-27.2-105	25.8148	463.283	1026.44	0.451348	0.0494068	0.00184179	0.142727	0.00520179	0.0209108	0.000490397	0.643474	0.0074616	0.000257983	168.6	88.875	135.47	4.62303	133.41	3.09739	150.256	5.1758			133.41	3.09739	1.52081	6/8 age
WK-27.2-106	37.8997	480.815	754.14	0.637567	0.0496769	0.00152183	0.26948	0.00855186	0.0388177	0.000837347	0.679738	0.0124011	0.000379233	188.97	72.21	242.278	6.84212	245.5	5.19787	249.112	7.57126			245.5	5.19787	-1.33004	6/8 age
WK-27.2-107	84.0473	104.681	810.811	0.129107	0.0675256	0.00153551	1.00575	0.0297309	0.105963	0.00261919	0.836167	0.034635	0.00109016	853.7	48.1475	706.725	15.0585	649.263	15.2707	688.2	21.2969			649.263	15.2707	8.13087	6/8 age
WK-27.2-108	10.3079	242.839	359.088	0.676265	0.052223	0.00234341	0.151513	0.00618584	0.0211113	0.000473614	0.549491	0.00745582	0.000270143	294.505	101.838	143.247	5.45543	134.675	2.99087	150.14	5.41978			134.675	2.99087	5.98362	6/8 age
WK-27.2-109	45.2869	467.141	205.845	2.26938	0.0619874	0.00179811	0.815085	0.023617	0.0948082	0.00219198	0.797937	0.0302618	0.000790088	672.235	67.585	605.303	13.2181	583.911	12.9106	602.586	15.5004			583.911	12.9106	3.53405	6/8 age
WK-27.2-11	11.914	269.066	422.574	0.636731	0.0481467	0.00181476	0.150191	0.0061922	0.022255	0.000462862	0.504458	0.00631847	0.000239431	105.645	88.88	142.081	5.46729	141.892	2.91985	127.309	4.80904			141.892	2.91985	0.133163	6/8 age
WK-27.2-110	86.6038	495.763	477.273	1.03874	0.0635916	0.00140905	1.02788	0.0278187	0.11566	0.00274553	0.877101	0.0429523	0.00123279	727.785	48.145	717.868	13.9377	705.533	15.8685	850.034	23.8912			705.533	15.8685	1.71819	6/8 age
WK-27.2-12	15.952	123.424	360.152	0.3427	0.050816	0.00174527	0.285015	0.0111016	0.0404309	0.00103776	0.658972	0.0133949	0.000512251	231.55	79.6175	254.628	8.77389	255.503	6.43137	268.943	10.2169			255.503	6.43137	-0.343792	6/8 age
WK-27.2-13	11.9141	370.279	330.94	1.11887	0.0585326	0.00280459	0.187735	0.00893931	0.0233797	0.000609996	0.547936	0.00768398	0.0003361	550.035	103.688	174.695	7.64305	148.98	3.8433	154.717	6.74154	151.96	3.75	151.96	3.75	14.7197	Concordia age
WK-27.2-14	28.2424	307.051	515.053	0.596154	0.049821	0.00146309	0.290922	0.00871081	0.0419509	0.000887198	0.706312	0.0142334	0.000493923	187.12	68.5075	259.284	6.85382	264.914	5.49084	285.661	9.84319			264.914	5.49084	-2.17128	6/8 age
WK-27.2-15	35.3096	168.851	224.507	0.752097	0.0655639	0.00169856	1.05423	0.0330731	0.114264	0.00245031	0.683552	0.0330783	0.00102338	792.28	58.3275	730.976	16.3552	697.466	14.1809	657.766	20.0224			697.466	14.1809	4.58426	6/8 age
WK-27.2-16	17.037	515.232	561.191	0.918106	0.0502466	0.00189414	0.140299	0.00570438	0.019944	0.000446949	0.55118	0.00620055	0.00021395	205.63	91.6525	133.31	5.08029	127.302	2.82571	124.94	4.29775			127.302	2.82571	4.50734	6/8 age
WK-27.2-17	56.5036	34.8434	123.784	0.281485	0.145299	0.0033856	7.86418	0.270057	0.383135	0.0105251	0.799965	0.105007	0.00418459	2291.05	39.8175	2215.58	30.9714	2090.91	49.0674	2018.23	76.5423			2291.05	39.8175	8.73562	7/6 age
WK-27.2-18	21.532	649.884	722.41	0.899606	0.0514961	0.00207936	0.150513	0.00643141	0.0209876	0.000447394	0.49888	0.00615508	0.000230622	264.88	92.58	142.365	5.67685	133.894	2.82573	124.027	4.63288			133.894	2.82573	5.94988	6/8 age
WK-27.2-19	36.1588	32.5516	1277.62	0.0254783	0.0503892	0.00119245	0.215891	0.00588323	0.03049	0.000537602	0.647028	0.00995612	0.00106758	213.035	83.32	198.485	4.9149	193.614	3.36469	200.24	21.3655			193.614	3.36469	2.45374	6/8 age
WK-27.2-2	5.11882	148.797	181.962	0.817736	0.0517002	0.00316519	0.155137	0.010554	0.0218194	0.000712425	0.47995	0.00689362	0.000485537	272.285	140.722	146.438	9.27767	139.144	4.49515	138.857	9.74659			139.144	4.49515	4.98068	6/8 age
WK-27.2-20	5.29308	45.184	99.5732	0.453776	0.0520643	0.00280665	0.314414	0.016667	0.0440162	0.00107943	0.46262	0.0142097	0.000810563	287.1	119.427	277.596	12.8766	277.679	6.66676	285.188	16.1537			277.679	6.66676	-0.0299208	6/8 age
WK-27.2-21	23.1957	255.624	371.684	0.687744	0.0513442	0.00166151	0.342576	0.0117665	0.0479831	0.00105794	0.641926	0.0144332	0.000652582	257.47	69.4325	299.122	8.90124	302.127	6.50973	289.642	13.0025			302.127	6.50973	-1.0046	6/8 age
WK-27.2-22	11.8971	237.383	454.748	0.522011	0.0577658	0.00261407	0.168114	0.00874634	0.020773	0.00050626	0.468437	0.00692865	0.00035285	520.41	99.985	157.78	7.60352	132.539	3.19795	139.561	7.08281	131.38	3.19	131.38	3.19	15.9976	Concordia age
WK-27.2-23	2.99294	67.5566	111.577	0.605471	0.0477642	0.00353814	0.133771	0.00953023	0.0206933	0.000591445	0.401184	0.00636815	0.000438971	87.13	166.64	127.481	8.53553	132.036	3.73608	128.306	8.81644			132.036	3.73608	-3.57337	6/8 age
WK-27.2-25	30.1489	1127.24	934.397	1.20638	0.0521358	0.00201033	0.139137	0.00514021	0.0192527	0.000489477	0.688182	0.00545401	0.000314835	300.06	82.3975	132.275	4.58267	122.931	3.09648	109.938	6.329			122.931	3.09648	7.06392	6/8 age
WK-27.2-26	17.3166	474.558	573.785	0.827066	0.0473981	0.00180628	0.134044	0.00503685	0.0205405	0.00046472	0.602103	0.00632861	0.000381064	77.87	88.88	127.725	4.51065	131.071	2.93634	127.512	7.65371			131.071	2.93634	-2.61924	6/8 age
WK-27.2-27	65.0474	1575.94	1712.72	0.92014	0.0499208	0.00110118	0.177935	0.0042558	0.0255365	0.000448911	0.734987	0.00732052	0.000451776	190.82	51.8425	166.282	3.67025	162.552	2.82317	147.425	9.06504			162.552	2.82317	2.24331	6/8 age
WK-27.2-28	10.9503	281.386	355.051	0.792521	0.0488751	0.00192828	0.150779	0.00596303	0.022289	0.000473646	0.537325	0.00605472	0.000438432	142.68	87.95	142.599	5.26234	142.106	2.98773	122.01	8.80835			142.106	2.98773	0.345742	6/8 age
WK-27.2-29	10.1354	219.833	369.291	0.595283	0.049628	0.00231197	0.148633	0.00702195	0.0218665	0.000550561	0.532946	0.00654407	0.000524718	176.01	109.243	140.704	6.20809	139.442	3.47401	131.839	10.5368			139.442	3.47401	0.897373	6/8 age
WK-27.2-3	9.61596	214.855	374.196	0.574176	0.0497139	0.00203129	0.14166	0.00589646	0.0205808	0.000456372	0.532738	0.00622481	0.000249816	188.97	96.2825	134.522	5.24506	131.325	2.88351	125.427	5.01811			131.325	2.88351	2.37605	6/8 age
WK-27.2-30	12.0544	309.244	415.085	0.745013	0.0525568	0.00236294	0.155876	0.00705034	0.0213826	0.00052006	0.537728	0.00630142	0.000516812	309.32	99.0625	147.087	6.1942	136.388	3.28316	126.966	10.3805			136.388	3.28316	7.27379	6/8 age
WK-27.2-31	4.35492	111.026	148.45	0.7479	0.0549208	0.00332248	0.160303	0.00931944	0.0213581	0.000508358	0.409411	0.00592209	0.000512719	409.31	102.767	150.968	8.1561	136.233	3.2094	119.346	10.3022			136.233	3.2094	9.7604	6/8 age
WK-27.2-32	13.5536	427.36	425.953	1.0033	0.0492325	0.00230461	0.142738	0.00656774	0.0209826	0.00046684	0.483539	0.00629799	0.000489855	166.75	104.615	135.479	5.83651	133.863	2.94848	126.897	9.83909			133.863	2.94848	1.19304	6/8 age
WK-27.2-33	16.4981	217.198	435.493	0.498741	0.0572161	0.0018073	0.236101	0.00804347	0.0294941	0.000563909	0.561213	0.00987685	0.000700579	498.19	70.3625	215.223	6.60885	187.381	3.53249	198.654	14.0218	189.37	3.52	189.37	3.52	12.936	Concordia age
WK-27.2-34	29.9255	194.649	675.319	0.288232	0.0507281	0.00125916	0.286841	0.00803696	0.0406138	0.000837606	0.736063	0.0121315	0.000790639	227.845	57.3975	256.07	6.34397	256.636	5.19067	243.728	15.789			256.636	5.19067	-0.221333	6/8 age
WK-27.2-35	45.8923	732.845	1811.38	0.404579	0.0502889	0.00126401	0.152022	0.00438477	0.0217356	0.000479378	0.764655	0.00673044	0.000406263	209.33	57.3975	143.696	3.86594	138.616	3.02546	135.581	8.15659			138.616	3.02546	3.53518	6/8 age
WK-27.2-36	244.748	95.2696	1073.69	0.0887312	0.104853	0.00171481	3.23985	0.0703576	0.221065	0.00424449	0.884138	0.0651427	0.00388024	1722.22	30.71	1466.75	16.8791	1287.5	22.4189	1275.57	73.6317	1440	18.8	1440	18.8	12.221	Concordia age
WK-27.2-37	6.75207	173.006	250.351	0.691055	0.0539038	0.00275438	0.14601	0.00689051	0.0197936	0.000431228	0.461652	0.00615732	0.00037631	368.57	112.025	138.383	6.10582	126.351	2.72677	124.072	7.55951			126.351	2.72677	8.69461	6/8 age
WK-27.2-38	9.4279	230.411	324.711	0.709589	0.0569199	0.00307248	0.159032	0.00825182	0.0202068	0.000407102	0.388275	0.0069206	0.00037959	487.08	123.13	149.855	7.22982	128.963	2.57331	139.399	7.61962	130.77	2.49	130.77	2.49	13.9417	Concordia age
WK-27.2-39	19.305	410.312	688.096	0.596301	0.0483734	0.00163642	0.148073	0.00451667	0.0222663	0.000437643	0.644359	0.00643451	0.000292932	116.755	79.6225	140.209	3.99579	141.963	2.76084	129.639	5.88295			141.963	2.76084	-1.25145	6/8 age
WK-27.2-4	20.7551	150.974	229.467	0.657932	0.0562336	0.001657	0.540285	0.0169384	0.0687202	0.0013838	0.642301	0.0206526	0.000590137	461.155	64.8075	438.612	11.1701	428.441	8.35015	413.183	11.6866			428.441	8.35015	2.31896	6/8 age
WK-27.2-40	8.52706	186.457	315.785	0.590454	0.0532099	0.00255897	0.150578	0.00757012	0.0204458	0.000447386	0.435249	0.00694329	0.000363943	338.945	104.62	142.423	6.68131	130.473	2.82713	139.854	7.30537			130.473	2.82713	8.39018	6/8 age
WK-27.2-41	16.8188	311.494	675.636	0.461038	0.0484264	0.00172449	0.139958	0.00507199	0.0209462	0.000478676	0.630601	0.00628555	0.000259929	120.46	87.9525	133.006	4.51863	133.633	3.0233	126.647	5.22093			133.633	3.0233	-0.471585	6/8 age
WK-27.2-42	98.1296	1055.2	2434.95	0.433355	0.0508645	0.00101601	0.246236	0.00555762	0.0346445	0.000619516	0.792287	0.0102404	0.000340217	235.25	46.285	223.514	4.53067	219.551	3.86175	205.929	6.80685			219.551	3.86175	1.77321	6/8 age
WK-27.2-44	15.7748	357.371	573.781	0.622836	0.0477966	0.00181208	0.139169	0.00581228	0.0207875	0.000452333	0.521017	0.00707659	0.000300577	100.09	75.92	132.303	5.18148	132.631	2.85745	142.53	6.03263			132.631	2.85745	-0.247724	6/8 age
WK-27.2-45	18.2603	379.949	638.88	0.594711	0.0504932	0.00177741	0.157967	0.00543336	0.0225253	0.000460837	0.594806	0.00691378	0.000250803	216.74	49.0675	148.922	4.76541	143.596	2.90634	139.262	5.03447			143.596	2.90634	3.57644	6/8 age
WK-27.2-46	219.058	204.867	1031.03	0.198702	0.0938524	0.0018539	2.56733	0.0621393	0.195729	0.00415548	0.877165	0.0581627	0.00206777	1505.56	4.6325	1291.38	17.7087	1152.33	22.4116	1142.68	39.497	1255.9	18.8	1255.9	18.8	10.7673	Concordia age
WK-27.2-47	42.3106	195.246	594.51	0.328415	0.056356	0.00163454	0.506707	0.0150878	0.0647614	0.00148014	0.76757	0.0208698	0.000686987	464.86	30.5525	416.232	10.1717	404.517	8.9639	417.484	13.6017			404.517	8.9639	2.81453	6/8 age
WK-27.2-48	155.537	378.582	470.934	0.803896	0.111393	0.00217778	4.05652	0.144867	0.258997	0.00801215	0.866241	0.0688708	0.00318321	1833.34	35.03	1645.61	29.1118	1484.71	41.0323	1346.19	60.1941			1484.71	41.0323	9.77764	6/8 age
WK-27.2-49	38.669	13.6758	1028.78	0.0132933	0.053318	0.00125078	0.302787	0.0100949	0.0404763	0.0010701	0.792974	0.0395705	0.00262888	342.65	53.6975	268.575	7.86999	255.784	6.63136	784.389	51.1129			255.784	6.63136	4.76236	6/8 age
WK-27.2-50	70.8486	965.274	2848.09	0.33892	0.0507817	0.00113215	0.157391	0.00458694	0.0222265	0.000549698	0.84861	0.00700754	0.00020375	231.55	47.2125	148.417	4.02541	141.712	3.46738	141.144	4.08958			141.712	3.46738	4.51715	6/8 age
WK-27.2-51	35.1497	739.351	803.884	0.919724	0.052441	0.0014822	0.226024	0.00728795	0.03098	0.000712215	0.712982	0.00922818	0.000315257	305.615	64.8075	206.911	6.03746	196.679	4.45453	185.667	6.31379			196.679	4.45453	4.94523	6/8 age
WK-27.2-52	6.42958	132.145	224.422	0.588823	0.0649052	0.00360232	0.186278	0.0101665	0.02081	0.000451598	0.397622	0.00744133	0.000385899	772.225	116.657	173.448	8.70269	132.773	2.85274	149.849	7.74226	134.86	2.82	134.86	2.82	23.4509	Concordia age
WK-27.2-53	209.047	350.789	1330.94	0.263565	0.0737489	0.0013401	1.45816	0.0328956	0.141127	0.00258072	0.810582	0.047605	0.00120249	1035.19	37.0375	913.247	13.6023	851.032	14.5861	940.003	23.2005			851.032	14.5861	6.81256	6/8 age
WK-27.2-54	5.42807	207.365	134.04	1.54704	0.0517467	0.00335291	0.14127	0.00767841	0.0203388	0.000492189	0.44523	0.00680826	0.000253725	275.99	149.98	134.174	6.83206	129.797	3.1104	137.144	5.09366			129.797	3.1104	3.26236	6/8 age
WK-27.2-55	9.87537	230.473	355.01	0.649202	0.050763	0.00216766	0.149137	0.00640304	0.0211733	0.000446508	0.491178	0.00710175	0.000302578	231.55	98.1325	141.15	5.65857	135.067	2.81964	143.035	6.07265			135.067	2.81964	4.3092	6/8 age
WK-27.2-56	67.2672	122.211	95.4926	1.27979	0.165392	0.00373234	9.11738	0.270173	0.394022	0.00953125	0.816314	0.118852	0.00307195	2522.22	38.4275	2349.85	27.1617	2141.46	44.0908	2269.9	55.4953	2357.8	28.7	2357.8	28.7	15.0964	Concordia age
WK-27.2-57	32.5421	59.6284	696.942	0.0855572	0.0606826	0.00172655	0.391018	0.0170228	0.0449061	0.00125623	0.642584	0.0275408	0.00179379	627.795	61.1	335.113	12.428	283.172	7.75168	549.133	35.2848	270.31	7.6	270.31	7.6	15.4996	Concordia age
WK-27.2-58	84.4714	1066.7	2054.02	0.519324	0.0518257	0.00125335	0.249202	0.00681431	0.0345074	0.000766316	0.812131	0.0100877	0.000345858	275.99	55.55	225.928	5.54097	218.697	4.77667	202.874	6.92074			218.697	4.77667	3.2006	6/8 age
WK-27.2-59	7.18062	164.504	259.197	0.634669	0.0489471	0.00266817	0.142902	0.00743288	0.0211338	0.000458303	0.416922	0.00652615	0.00029278	146.38	160.165	135.625	6.60421	134.818	2.89418	131.479	5.87937			134.818	2.89418	0.595332	6/8 age
WK-27.2-60	99.8273	213.276	495.252	0.430641	0.0824632	0.00217725	1.95225	0.0716805	0.167697	0.00436614	0.709098	0.0537637	0.0015747	1257.4	50.7725	1099.22	24.6648	999.41	24.1098	1058.48	30.2042			999.41	24.1098	9.08015	6/8 age
WK-27.2-61	11.961	258.826	166.026	1.55895	0.0615516	0.00331291	0.33063	0.018114	0.0386672	0.00103195	0.487128	0.0128615	0.000500645	657.42	115.567	290.047	13.8239	244.567	6.4061	258.303	9.99065	248.15	6.33	248.15	6.33	15.6803	Concordia age
WK-27.2-62	28.276	897.256	973.637	0.921551	0.0497774	0.00164895	0.139787	0.00498707	0.0202002	0.000463308	0.642891	0.00623721	0.000209739	183.415	77.765	132.854	4.44366	128.921	2.92837	125.676	4.21301			128.921	2.92837	2.96082	6/8 age
WK-27.2-63	15.7647	462.268	566.532	0.81596	0.0488126	0.00205265	0.136383	0.00565888	0.0202621	0.000452345	0.538041	0.0059007	0.000191641	138.975	99.985	129.817	5.0571	129.312	2.85895	118.916	3.85076			129.312	2.85895	0.389003	6/8 age
WK-27.2-64	6.47676	44.6721	90.7517	0.492245	0.0519227	0.00263443	0.42193	0.0209368	0.0593686	0.00137467	0.466627	0.0185133	0.00082014	283.395	116.65	357.43	14.9527	371.785	8.36747	370.772	16.2755			371.785	8.36747	-4.01608	6/8 age
WK-27.2-65	12.0696	267.185	430.438	0.620729	0.0527968	0.00220089	0.155548	0.00686542	0.0212685	0.000468725	0.499317	0.00709431	0.000267462	320.43	89.805	146.798	6.03349	135.668	2.95958	142.885	5.36791			135.668	2.95958	7.5819	6/8 age
WK-27.2-66	18.536	98.2391	337.885	0.290747	0.0617198	0.00181262	0.441617	0.0203456	0.0507832	0.00167438	0.715666	0.0188517	0.000980058	664.83	58.3275	371.392	14.3324	319.328	10.2736	377.487	19.4426	310.8	10.4	310.8	10.4	14.0187	Concordia age
WK-27.2-67	16.4094	261.672	547.576	0.477873	0.0497704	0.00160368	0.172343	0.00601325	0.0249234	0.00051563	0.592947	0.00787504	0.000282291	183.415	75.9125	161.45	5.20932	158.697	3.24427	158.549	5.66114			158.697	3.24427	1.70547	6/8 age
WK-27.2-68	6.70318	210.811	195.728	1.07706	0.0544464	0.00404296	0.162849	0.0113024	0.0224598	0.000617301	0.39601	0.0074185	0.000425809	390.79	166.648	153.194	9.86963	143.183	3.89274	149.391	8.54317			143.183	3.89274	6.53473	6/8 age
WK-27.2-69	85.8303	82.6476	464.201	0.178043	0.0883384	0.00171951	2.16497	0.0735237	0.175315	0.00516402	0.867346	0.066846	0.00209549	1390.74	37.0375	1169.87	23.6013	1041.33	28.3294	1307.86	39.7008	1157.3	27.3	1157.3	27.3	10.9872	Concordia age
WK-27.2-7	21.4599	173.807	181.824	0.955907	0.0625033	0.00208776	0.675563	0.0222258	0.0780327	0.00162235	0.631943	0.0244804	0.000680633	700.01	71.4425	524.089	13.4734	484.369	9.70486	488.845	13.4284			484.369	9.70486	7.57888	6/8 age
WK-27.2-70	6.2201	156.511	217.987	0.717985	0.054949	0.00270843	0.157316	0.00844361	0.0206502	0.000450026	0.406029	0.00661322	0.000309487	409.31	111.1	148.351	7.40878	131.764	2.84325	133.228	6.21432	131.62	2.84	131.62	2.84	11.1809	Concordia age
WK-27.2-71	37.6323	528.473	1419.82	0.372212	0.0483994	0.0013078	0.158844	0.00479556	0.0235756	0.000452382	0.635584	0.007725	0.000234839	120.46	67.585	149.691	4.20312	150.214	2.85023	155.539	4.71023			150.214	2.85023	-0.349864	6/8 age
WK-27.2-72	262.043	245.468	348.387	0.704583	0.188268	0.00336291	13.5639	0.348525	0.516856	0.0112131	0.844318	0.145027	0.00408104	2726.86	34.7225	2719.75	24.3692	2685.83	47.676	2737.31	72.0393			2726.86	34.7225	1.50464	7/6 age
WK-27.2-73	25.4081	229.598	519.808	0.441698	0.0514448	0.00148945	0.293901	0.00889496	0.0413693	0.000849937	0.678837	0.0142462	0.000508558	261.175	66.655	261.625	6.98255	261.315	5.26328	285.916	10.1347			261.315	5.26328	0.118599	6/8 age
WK-27.2-74	23.3514	362.993	444.954	0.815798	0.0511403	0.00150826	0.268559	0.00949999	0.0375899	0.00080834	0.60791	0.0119979	0.000399757	255.62	73.135	241.541	7.60578	237.877	5.02376	241.062	7.98419			237.877	5.02376	1.5169	6/8 age
WK-27.2-75	14.1507	270.937	620.031	0.436973	0.0596619	0.0027507	0.160946	0.00780863	0.0195411	0.000470637	0.496412	0.00721606	0.000333672	590.77	99.985	151.531	6.83034	124.755	2.97654	145.329	6.69593	125.78	2.97	125.78	2.97	17.6702	Concordia age
WK-27.2-76	19.7586	579.169	646.12	0.896381	0.0513807	0.0016823	0.153697	0.00566238	0.021609	0.000515308	0.647288	0.00694445	0.000270199	257.47	71.285	145.171	4.98451	137.817	3.25247	139.878	5.42367			137.817	3.25247	5.06564	6/8 age
WK-27.2-77	398.112	246.363	1133.09	0.217427	0.120451	0.00239343	5.3862	0.13589	0.321201	0.00637247	0.786367	0.0886943	0.00343701	1962.66	35.0275	1882.66	21.644	1795.59	31.1077	1717.62	63.8101			1962.66	35.0275	8.51245	7/6 age
WK-27.2-78	39.4267	177.93	898.342	0.198065	0.0513903	0.00131882	0.329178	0.0102157	0.0463214	0.00112443	0.78219	0.0140063	0.000494812	257.47	59.2475	288.938	7.80646	291.898	6.92946	281.134	9.86311			291.898	6.92946	-1.02438	6/8 age
WK-27.2-8	250.415	324.845	660.05	0.492152	0.112577	0.00205326	5.01843	0.125072	0.318403	0.00723423	0.911638	0.0795222	0.00250796	1842.6	32.255	1822.44	21.1376	1781.92	35.3853	1546.61	46.9572			1842.6	32.255	3.29268	7/6 age
WK-27.2-80	11.7841	312.396	440.844	0.708631	0.0486789	0.00203949	0.13872	0.00619855	0.0205581	0.00042041	0.457656	0.00650727	0.000270102	131.57	98.1325	131.903	5.5279	131.182	2.65649	131.1	5.42406			131.182	2.65649	0.546706	6/8 age
WK-27.2-81	8.37286	195.163	308.967	0.631662	0.0570125	0.00264841	0.17527	0.00868277	0.0222838	0.000574601	0.520508	0.00681369	0.000347161	500.04	101.84	163.982	7.50237	142.073	3.62419	137.253	6.96941	143.24	3.61	143.24	3.61	13.3605	Concordia age
WK-27.2-83	82.4485	764.54	1117.94	0.683881	0.0557631	0.00113673	0.476218	0.0128376	0.0612882	0.0013595	0.822855	0.0197176	0.000852803	442.64	44.44	395.475	8.83415	383.455	8.26039	394.658	16.9038			383.455	8.26039	3.03927	6/8 age
WK-27.2-84	18.8309	219.442	412.426	0.532075	0.0534152	0.00152201	0.28086	0.00830114	0.037941	0.000779467	0.695091	0.013058	0.00048013	346.35	64.81	251.34	6.58283	240.058	4.84283	262.223	9.57942			240.058	4.84283	4.48879	6/8 age
WK-27.2-85	37.2528	301.168	190.892	1.57768	0.0633844	0.00188046	0.89904	0.0361779	0.101519	0.00334821	0.819602	0.0373246	0.00105441	720.38	62.9575	651.214	19.3488	623.302	19.5976	740.675	20.5452			623.302	19.5976	4.28613	6/8 age
WK-27.2-86	51.0204	202.024	333.253	0.606218	0.062972	0.00150522	1.12056	0.03233	0.127332	0.00251834	0.685497	0.0411591	0.00122393	707.11	54.625	763.245	15.4892	772.628	14.4066	815.252	23.7604			772.628	14.4066	-1.2294	6/8 age
WK-27.2-87	27.7646	233.277	466.767	0.499772	0.0534308	0.00179546	0.376982	0.01226	0.0508226	0.000990055	0.599009	0.0174553	0.000959904	346.35	43.515	324.815	9.04317	319.57	6.07608	349.767	19.0689			319.57	6.07608	1.61483	6/8 age
WK-27.2-88	11.7065	347.411	455.512	0.762682	0.0496814	0.00258912	0.140052	0.00710799	0.0203466	0.000430959	0.417337	0.00615458	0.000261271	188.97	122.205	133.09	6.33135	129.846	2.72365	124.017	5.24856			129.846	2.72365	2.4374	6/8 age
WK-27.2-89	22.7568	269.639	511.849	0.526793	0.0515698	0.00169123	0.27608	0.00903416	0.0386796	0.000860345	0.679732	0.0125984	0.000456468	264.88	74.0625	247.543	7.19049	244.644	5.34124	253.052	9.11144			244.644	5.34124	1.17148	6/8 age
WK-27.2-9	4.85548	76.0343	155.221	0.489845	0.0598916	0.00332487	0.208127	0.0114809	0.0255509	0.000785686	0.557437	0.00768288	0.000425186	598.17	120.353	191.98	9.65015	162.642	4.93945	154.695	8.52844	166.13	4.82	166.13	4.82	15.2816	Concordia age
WK-27.2-90	15.5339	360.515	611.19	0.589858	0.0503975	0.00210664	0.145406	0.00558612	0.0210163	0.000444935	0.551078	0.00731204	0.000277178	213.035	91.6525	137.848	4.95289	134.076	2.81013	147.255	5.56171			134.076	2.81013	2.73618	6/8 age
WK-27.2-91	41.1037	1121.88	1805.59	0.621337	0.0505205	0.00135686	0.132995	0.00374987	0.0188852	0.000399458	0.750189	0.00608845	0.000212662	220.44	56.47	126.786	3.36171	120.606	2.52818	122.688	4.27235			120.606	2.52818	4.87386	6/8 age
WK-27.2-92	2.96817	103.702	98.1759	1.05629	0.0484253	0.00486876	0.133648	0.0128534	0.0207289	0.000615751	0.308867	0.00683662	0.000424796	120.46	222.19	127.37	11.5129	132.261	3.88943	137.713	8.52776			132.261	3.88943	-3.8398	6/8 age
WK-27.2-93	172.261	37.4612	659.412	0.0568101	0.112518	0.00231411	4.28363	0.107609	0.273294	0.00648403	0.944449	0.0809022	0.00342101	1840.43	37.3475	1690.22	20.7117	1557.5	32.838	1572.43	63.9708	1690.8	21.5	1690.8	21.5	15.373	Concordia age
WK-27.2-94	19.2332	210.273	673.091	0.3124	0.0638979	0.00274433	0.242585	0.0118824	0.0270708	0.000664841	0.501392	0.0106819	0.000614067	738.895	86.1025	220.535	9.71092	172.189	4.17391	214.761	12.2805	170.3	4.18	170.3	4.18	21.9222	Concordia age
WK-27.2-95	110.934	126.735	277.903	0.456041	0.113026	0.00229482	5.337	0.128554	0.337733	0.00702881	0.864012	0.103197	0.00317649	1850.01	35.96	1874.81	20.6377	1875.75	33.8864	1985.08	58.1982			1850.01	35.96	-1.39182	7/6 age
WK-27.2-96	19.5999	150.984	284.288	0.531095	0.0529182	0.00152312	0.425342	0.0133794	0.057502	0.00114141	0.631045	0.0192852	0.00083391	324.13	66.66	359.864	9.53435	360.416	6.96064	386.085	16.5363			360.416	6.96064	-0.153416	6/8 age
WK-27.2-98	6.90149	198.386	183.758	1.07961	0.0507823	0.00267652	0.179441	0.0100895	0.0253699	0.000634363	0.444705	0.00758234	0.000297302	231.55	122.205	167.58	8.68685	161.504	3.98914	152.678	5.96392			161.504	3.98914	3.62533	6/8 age
WK-27.2-99	19.397	752.654	554.787	1.35665	0.0502583	0.00209357	0.144581	0.00588776	0.0206849	0.00041154	0.488561	0.00649761	0.000193365	205.63	98.1325	137.116	5.22399	131.983	2.60017	130.906	3.88311			131.983	2.60017	3.74333	6/8 age
	WK-36 (n=88) (0°41′33″ S, 111°42′19″ E)
Spot	Pb(ppm)	Th(ppm)	U(ppm)	Th/U	U-Th-Pb ratios									Ages (Ma)										Inferred Age (Ma)	1σ	Discodance (%)	Notes
					207Pb/206Pb	1σ	207Pb/235U	1σ	206Pb/238U	1σ	Rho	208Pb/232Th	1σ	207Pb/206Pb	1σ	207Pb/235U	1σ	206Pb/238U	1σ	208Pb/232Th	1σ	Conc age	1σ
WK-36-1	202.285	106.936	1395.93	0.0766053	0.0903469	0.00196007	1.84173	0.0485295	0.145683	0.00382496	0.996411	0.0444399	0.00203111	1433.03	41.515	1060.48	17.3551	876.719	21.5271	878.842	39.3065	1007.8	19.4	1007.8	19.4	17.3281	Concordia age
WK-36-10	17.4868	457.474	580.905	0.78752	0.0529762	0.00217893	0.139266	0.00569229	0.0189923	0.000417621	0.537974	0.00651794	0.000300079	327.835	92.5825	132.389	5.07412	121.284	2.64279	131.315	6.026			121.284	2.64279	8.38846	6/8 age
WK-36-100	11.3256	123.619	258.998	0.477295	0.0599756	0.00268669	0.275199	0.0126701	0.0332761	0.000835585	0.545415	0.0126442	0.000608896	611.13	98.135	246.842	10.09	211.02	5.2143	253.965	12.1535	214.53	5.14	214.53	5.14	14.5123	Concordia age
WK-36-101	10.7072	168.201	326.534	0.515111	0.061246	0.0031	0.198888	0.00933191	0.0241136	0.00066224	0.585315	0.0100123	0.000576202	655.57	76.8425	184.185	7.90454	153.602	4.16938	201.365	11.5309	158.78	3.92	158.78	3.92	16.6043	Concordia age
WK-36-102	39.1423	766.634	883.351	0.86787	0.0542906	0.00178198	0.184605	0.00683416	0.0241151	0.000512336	0.573886	0.00864352	0.000260138	383.385	72.215	172.016	5.85906	153.611	3.22603	173.954	5.2129	154.48	3.22	154.48	3.22	10.6995	Concordia age
WK-36-103	34.6015	797.39	1182.99	0.674047	0.0513279	0.00147859	0.156977	0.00523151	0.0218417	0.000483907	0.664792	0.00724586	0.000290031	253.77	66.655	148.054	4.59236	139.285	3.05371	145.927	5.82			139.285	3.05371	5.92283	6/8 age
WK-36-106	17.6137	217.096	337.677	0.64291	0.0638927	0.00249645	0.312374	0.0119475	0.0356342	0.000905592	0.664451	0.0136387	0.000572329	738.895	83.325	276.02	9.2457	225.715	5.63827	273.806	11.4124	234.32	5.43	234.32	5.43	18.2251	Concordia age
WK-36-107	38.8703	289.117	411.882	0.70194	0.0616825	0.00213152	0.535606	0.0327342	0.0623065	0.00327319	0.85957	0.0282744	0.000988938	664.83	78.6925	435.523	21.6467	389.637	19.8639	563.558	19.439	396.9	20.7	396.9	20.7	10.5358	Concordia age
WK-36-108	56.3368	1136.19	959.546	1.18409	0.0556646	0.00145084	0.269374	0.00839813	0.0345837	0.000713215	0.661488	0.0110259	0.000414887	438.935	52.7725	242.193	6.71976	219.172	4.44557	221.639	8.29433			219.172	4.44557	9.50506	6/8 age
WK-36-11	51.2777	663.075	1365	0.48577	0.0520877	0.00139487	0.200208	0.00573867	0.0275637	0.000573469	0.725844	0.0100632	0.000359413	300.06	61.105	185.303	4.85658	175.282	3.5989	202.382	7.19217			175.282	3.5989	5.40752	6/8 age
WK-36-110	18.6168	412.978	547.265	0.754622	0.0595808	0.00220098	0.169534	0.00660391	0.0206296	0.000477553	0.594274	0.0074268	0.000391057	587.065	80.3875	159.014	5.7345	131.633	3.01712	149.558	7.84587	133.78	3	133.78	3	17.219	Concordia age
WK-36-12	73.9897	122.443	1085.99	0.112748	0.0600243	0.00139688	0.54573	0.013681	0.0651787	0.00131238	0.803185	0.0237788	0.000852505	605.575	49.99	442.196	8.99199	407.043	7.94551	474.996	16.8308			407.043	7.94551	7.9495	6/8 age
WK-36-14	102.683	753.271	910.032	0.82774	0.0613798	0.00144314	0.609049	0.0148005	0.0710702	0.0012636	0.731644	0.0267639	0.000730864	653.72	45.365	482.96	9.34555	442.6	7.60897	533.845	14.3873			442.6	7.60897	8.35686	6/8 age
WK-36-15	85.0847	44.5363	492.914	0.0903532	0.106128	0.00207663	2.35241	0.0549479	0.158257	0.00298268	0.80687	0.0448722	0.00177771	1800	35.645	1228.29	16.6637	947.086	16.6083	887.208	34.3883	1023.2	17.9	1023.2	17.9	22.8938	Concordia age
WK-36-16	24.8972	410.12	446.64	0.918233	0.0532573	0.00170749	0.258579	0.00900568	0.0347554	0.000747347	0.617415	0.0143295	0.000522667	338.945	72.215	233.521	7.26725	220.242	4.65741	287.576	10.415			220.242	4.65741	5.68644	6/8 age
WK-36-18	16.4476	63.9925	125.998	0.507886	0.07348	0.00230063	0.970409	0.0303698	0.0955861	0.00212873	0.711604	0.0375329	0.00152498	1027.78	68.675	688.675	15.6571	588.49	12.5295	744.733	29.7082	617.4	11.8	617.4	11.8	14.5475	Concordia age
WK-36-19	15.2547	61.9973	323.156	0.191849	0.0553015	0.00223951	0.233711	0.0115475	0.0303813	0.00108401	0.722132	0.0130007	0.000671611	433.38	95.36	213.257	9.50507	192.934	6.78272	261.08	13.4005			192.934	6.78272	9.52982	6/8 age
WK-36-20	170.451	260.986	497.345	0.524758	0.11845	0.00210937	4.34797	0.132649	0.261548	0.00735746	0.922058	0.0812761	0.00177515	1933.03	31.33	1702.51	25.2118	1497.76	37.6047	1579.42	33.1828	1764.4	25.3	1764.4	25.3	12.0264	Concordia age
WK-36-21	37.859	276.269	1146.58	0.240951	0.0566009	0.00177975	0.169164	0.00754821	0.021199	0.00067396	0.712495	0.025437	0.000860419	475.97	68.5125	158.693	6.55628	135.229	4.25506	507.707	16.9596	132.94	4.26	132.94	4.26	14.7856	Concordia age
WK-36-23	158.802	184.597	319.628	0.577537	0.160453	0.00288692	8.64977	0.249911	0.384786	0.0106292	0.956089	0.109386	0.00329088	2460.18	29.475	2301.81	26.3431	2098.6	49.4935	2098.16	59.9574	2369.7	23.3	2369.7	23.3	14.6972	Concordia age
WK-36-24	17.3018	148.648	245.135	0.606393	0.0741578	0.00408491	0.336293	0.0169655	0.0328149	0.00100838	0.609121	0.0135645	0.000650566	1055.56	111.115	294.359	12.8928	208.142	6.29489	272.326	12.9734	219.65	6.04	219.65	6.04	29.2898	Concordia age
WK-36-26	64.4296	835.305	2043.19	0.408823	0.060278	0.00158352	0.197433	0.00543389	0.0235307	0.000508843	0.785704	0.00957622	0.000378699	612.98	83.32	182.952	4.60944	149.931	3.20582	192.636	7.58175	155.99	3.13	155.99	3.13	18.0488	Concordia age
WK-36-27	22.273	104.955	364.544	0.287908	0.0709285	0.00237084	0.453232	0.0151173	0.0459212	0.00102031	0.666138	0.026882	0.00104357	955.24	73.15	379.54	10.5657	289.432	6.2905	536.17	20.5407	301.46	6.18	301.46	6.18	23.7416	Concordia age
WK-36-28	29.1225	382.18	838.976	0.455531	0.0539693	0.00193863	0.185722	0.00673752	0.0246954	0.000542067	0.605062	0.0107756	0.000364774	368.57	81.4725	172.972	5.77082	157.263	3.41123	216.633	7.2943			157.263	3.41123	9.08204	6/8 age
WK-36-29	99.5856	81.9053	1394.25	0.0587453	0.0645326	0.00124213	0.62152	0.0131561	0.0688054	0.00128061	0.879269	0.0246954	0.00143271	758.95	40.7375	490.799	8.24499	428.954	7.72734	493.086	28.2605	453.22	7.23	453.22	7.23	12.6009	Concordia age
WK-36-30	21.9605	237.538	545.453	0.435488	0.0557495	0.00151643	0.256024	0.00692348	0.0330397	0.000621226	0.695295	0.0103927	0.000320256	442.64	56.475	231.458	5.59923	209.545	3.87825	208.975	6.40651			209.545	3.87825	9.46735	6/8 age
WK-36-31	27.714	120.444	210.329	0.572646	0.078462	0.00284487	1.07655	0.0975963	0.0891956	0.0072271	0.893758	0.0442746	0.00181922	1158.34	71.91	741.947	47.725	550.778	42.7747	875.643	35.2116	348.6	41.1	348.6	41.1	25.7658	Concordia age
WK-36-32	43.8988	193.48	806.913	0.239779	0.0570009	0.00143133	0.329354	0.00969912	0.0412761	0.000874143	0.719142	0.0260347	0.000779131	500.04	55.55	289.073	7.41096	260.738	5.41355	519.485	15.3484			260.738	5.41355	9.80196	6/8 age
WK-36-33	47.2895	544.445	1056.56	0.515298	0.0547541	0.00122175	0.260273	0.00653914	0.0340377	0.000650499	0.760666	0.012086	0.000320584	466.71	49.995	234.887	5.27091	215.769	4.05702	242.821	6.40235			215.769	4.05702	8.13892	6/8 age
WK-36-34	15.9227	270.527	245.533	1.10179	0.0634032	0.00248409	0.335474	0.014404	0.0386509	0.00120634	0.726916	0.0171379	0.00208635	720.38	282.4	293.736	10.9534	244.465	7.48832	343.461	41.4592	251.7	7.41	251.7	7.41	16.774	Concordia age
WK-36-35	133.475	203.164	668.953	0.303705	0.0968744	0.00166132	1.93396	0.0511948	0.143048	0.00372491	0.983682	0.0677861	0.00170654	1564.82	32.8675	1092.91	17.7331	861.876	21.0124	1325.67	32.3033	1019.1	23.8	1019.1	23.8	21.1393	Concordia age
WK-36-36	113.885	161.691	516.065	0.313315	0.103728	0.00197204	2.30277	0.0524004	0.158909	0.00312852	0.865183	0.0793328	0.00196513	1691.66	35.1875	1213.14	16.1308	950.709	17.4099	1543.06	36.8001	1056.4	18.2	1056.4	18.2	21.6324	Concordia age
WK-36-37	59.382	37.9649	124.96	0.303815	0.215632	0.00395108	12.1882	0.453164	0.405664	0.0149444	0.990827	0.135411	0.00466392	2949.99	29.63	2619	34.9352	2195.07	68.5457	2566.84	83.0256	2835.4	22.3	2835.4	22.3	25.5908	Concordia age
WK-36-39	12.3961	64.7294	588.292	0.110029	0.066615	0.0027478	0.186363	0.0100782	0.0197225	0.000648444	0.607978	0.0147291	0.000843541	825.61	85.1825	173.522	8.62652	125.902	4.09985	295.536	16.8024	118.86	4	118.86	4	27.443	Concordia age
WK-36-40	57.7009	216.663	520.588	0.416189	0.0728673	0.00170139	0.916842	0.0431414	0.0894621	0.00378874	0.900028	0.0361262	0.00129357	1010.18	47.6875	660.689	22.8571	552.355	22.4202	717.311	25.2343	560	26.8	560	26.8	16.397	Concordia age
WK-36-41	29.7753	69.0133	337.158	0.204691	0.0767523	0.00214532	0.6594	0.0339499	0.0612259	0.00280643	0.890287	0.0413609	0.00172653	1114.5	56.0175	514.247	20.7768	383.077	17.0489	819.17	33.511	334.9	18.2	334.9	18.2	25.5073	Concordia age
WK-36-42	28.7949	79.0278	1196.96	0.066024	0.0572944	0.00145965	0.181739	0.00473196	0.0228169	0.000435641	0.733296	0.0170163	0.00119437	501.89	55.55	169.555	4.06747	145.434	2.7468	341.044	23.737	150.14	2.65	150.14	2.65	14.2263	Concordia age
WK-36-43	41.6961	494.997	800.497	0.618362	0.0517343	0.00131865	0.26817	0.00774574	0.03715	0.000751059	0.699941	0.0121225	0.000346546	272.285	59.2525	241.229	6.20394	235.143	4.66994	243.549	6.92058			235.143	4.66994	2.5229	6/8 age
WK-36-44	19.6285	162.217	774.687	0.209397	0.0560201	0.00170856	0.167569	0.00517098	0.0215704	0.000438276	0.658432	0.0121226	0.000513272	453.75	68.5125	157.307	4.49824	137.573	2.76665	243.552	10.2501	140.85	2.67	140.85	2.67	12.5446	Concordia age
WK-36-45	59.0897	345.657	1394.41	0.247887	0.0661156	0.00256316	0.292802	0.0120859	0.031675	0.000543319	0.415561	0.0151291	0.000786217	809.26	86.1075	260.763	9.49406	201.023	3.39666	303.503	15.6544	200.72	3.4	200.72	3.4	22.9097	Concordia age
WK-36-46	21.2302	637.468	613.309	1.03939	0.0541589	0.0017655	0.158021	0.00525663	0.0210163	0.00041047	0.587127	0.00630288	0.000197777	375.98	74.0675	148.969	4.61027	134.076	2.59261	126.995	3.97247			134.076	2.59261	9.99769	6/8 age
WK-36-47	29.6026	176.324	557.333	0.316372	0.0592415	0.0016625	0.275498	0.00853401	0.0331558	0.000538637	0.524449	0.0167285	0.000565074	575.96	56.47	247.08	6.79573	210.269	3.36277	335.324	11.2335	211.26	3.37	211.26	3.37	14.8985	Concordia age
WK-36-48	209.042	190.826	531.968	0.358716	0.11638	0.00182029	5.34837	0.125757	0.329049	0.00729272	0.942583	0.0884299	0.00207297	1901.85	28.09	1876.63	20.1544	1833.77	35.3864	1712.71	38.4951			1901.85	28.09	3.57968	7/6 age
WK-36-5	82.8725	1241.17	1425.37	0.870773	0.0541731	0.00133327	0.252513	0.0101562	0.0329144	0.000983005	0.742544	0.0173349	0.00057021	388.94	55.55	228.616	8.23487	208.763	6.13597	347.374	11.3288			208.763	6.13597	8.68387	6/8 age
WK-36-50	33.1663	462.438	799.403	0.578479	0.0556396	0.00227916	0.198078	0.00683577	0.0258634	0.000524759	0.587926	0.0100989	0.000278358	438.935	92.5825	183.498	5.79473	164.607	3.29873	203.098	5.56999			164.607	3.29873	10.2954	6/8 age
WK-36-52	221.03	383.973	707.499	0.542719	0.108591	0.00188988	3.45973	0.15208	0.225183	0.00905389	0.914682	0.0765616	0.00188938	1775.62	31.7925	1518.09	34.6407	1309.2	47.6431	1491.1	35.4727	1694.1	27.3	1694.1	27.3	13.7597	Concordia age
WK-36-54	13.5391	182.643	384.839	0.474595	0.0594793	0.00215182	0.22258	0.00846876	0.0269323	0.000556803	0.543369	0.00949298	0.000372156	583.36	77.765	204.055	7.03488	171.32	3.49647	190.969	7.45137	173.53	3.48	173.53	3.48	16.0422	Concordia age
WK-36-55	13.5065	135.614	419.244	0.323474	0.0717639	0.00322139	0.239802	0.0111065	0.0240925	0.00062018	0.55579	0.0137347	0.00072625	988.89	124.233	218.258	9.09731	153.469	3.90476	275.72	14.4803	155.6	3.91	155.6	3.91	29.6847	Concordia age
WK-36-56	71.1786	117.325	400.37	0.293043	0.128413	0.00356853	2.36627	0.149695	0.142932	0.00977688	0.924851	0.102043	0.00485727	2076.23	48.3025	1232.48	45.161	861.22	55.146	1963.93	89.0857	254.9	53	254.9	53	30.1229	Concordia age
WK-36-57	30.1856	143.156	675.798	0.211833	0.0598535	0.00182062	0.288625	0.00967624	0.0346309	0.000771841	0.6648	0.0187038	0.00072636	598.17	65.575	257.476	7.62649	219.466	4.81053	374.554	14.4118	223.7	4.78	223.7	4.78	14.7625	Concordia age
WK-36-58	27.869	448.594	628.444	0.713817	0.0523838	0.00144731	0.199378	0.00549276	0.0275071	0.000547743	0.722801	0.00955986	0.000297721	301.91	62.9575	184.6	4.65182	174.927	3.43775	192.308	5.96062			174.927	3.43775	5.23976	6/8 age
WK-36-59	16.2551	218.483	443.809	0.49229	0.0501737	0.00178647	0.170899	0.0062191	0.0249065	0.00060643	0.669083	0.0100411	0.000338711	211.185	83.32	160.199	5.3942	158.591	3.81526	201.94	6.77804			158.591	3.81526	1.00374	6/8 age
WK-36-6	20.404	29.0899	477.305	0.0609463	0.068887	0.00319792	0.416496	0.0211951	0.0428473	0.00112765	0.517162	0.0249602	0.00158837	894.445	95.215	353.542	15.1951	270.458	6.97216	498.308	31.3227	270.55	7.03	270.55	7.03	23.5006	Concordia age
WK-36-60	18.4652	54.775	306.735	0.178575	0.0660286	0.00289636	0.301491	0.0114831	0.033336	0.000937589	0.738441	0.0339439	0.00175469	807.1	87.96	267.564	8.96059	211.393	5.85022	674.695	34.3019	225.52	5.29	225.52	5.29	20.9935	Concordia age
WK-36-62	19.7523	184.415	603.63	0.305511	0.0563161	0.00202824	0.20526	0.00822037	0.0261879	0.000669722	0.638569	0.0137277	0.000500601	464.86	79.6225	189.568	6.92653	166.645	4.20809	275.581	9.98125	168.83	4.18	168.83	4.18	12.0919	Concordia age
WK-36-63	94.9976	971.754	427.342	2.27395	0.064686	0.00149163	0.821403	0.0193975	0.0914201	0.00166311	0.770355	0.0287569	0.000589552	764.82	49.225	608.831	10.8215	563.93	9.8278	573.04	11.5831			563.93	9.8278	7.37487	6/8 age
WK-36-64	33.2362	185.016	983.604	0.1881	0.0566512	0.00161405	0.227176	0.00711831	0.0287006	0.00055388	0.615901	0.0117757	0.000428769	479.67	62.9575	207.865	5.89149	182.411	3.47232	236.623	8.56551	184.73	3.45	184.73	3.45	12.2456	Concordia age
WK-36-66	17.827	22.3154	425.631	0.0524291	0.0631846	0.00184158	0.321301	0.00999136	0.0366215	0.000757111	0.664831	0.035924	0.00196481	722.23	62.9575	282.903	7.6805	231.857	4.7099	713.366	38.3361	237.71	4.67	237.71	4.67	18.0435	Concordia age
WK-36-68	20.3031	116.102	628.131	0.184837	0.0575779	0.00167704	0.210332	0.0072269	0.0261521	0.000626873	0.697632	0.0203795	0.00078192	522.26	60.18	193.831	6.06429	166.421	3.93912	407.774	15.4887	168.49	3.94	168.49	3.94	14.1414	Concordia age
WK-36-69	13.3454	75.3449	255.414	0.294991	0.0691028	0.00290882	0.371373	0.0159194	0.0389299	0.00098587	0.590773	0.0176029	0.00105988	901.85	87.04	320.671	11.789	246.196	6.11863	352.699	21.0519	252.66	6.08	252.66	6.08	23.2245	Concordia age
WK-36-7	25.7766	252.018	420.116	0.599877	0.0560771	0.00206161	0.368515	0.0167622	0.0465758	0.00119347	0.563348	0.0177102	0.0007713	453.75	113.875	318.552	12.4388	293.465	7.35295	354.83	15.3184			293.465	7.35295	7.87544	6/8 age
WK-36-70	14.1439	62.4694	567.44	0.11009	0.0610178	0.00296842	0.133328	0.00678207	0.0156606	0.00037467	0.470325	0.00895433	0.000766954	638.905	105.54	127.084	6.07688	100.173	2.37865	180.182	15.3643	100.82	2.38	100.82	2.38	21.1758	Concordia age
WK-36-72	83.0289	45.135	869.095	0.0519333	0.072938	0.001396	0.917959	0.0249395	0.0907895	0.0024685	0.999233	0.0475893	0.00451238	1012.96	38.89	661.28	13.2108	560.205	14.5916	939.699	87.0621	621.8	14.2	621.8	14.2	15.2848	Concordia age
WK-36-73	63.8298	603.157	1262.54	0.477734	0.0517747	0.00104308	0.271701	0.00597182	0.0377223	0.000742745	0.89583	0.0125953	0.000333231	275.99	46.2925	244.053	4.77106	238.699	4.61579	252.99	6.65157			238.699	4.61579	2.1936	6/8 age
WK-36-74	36.6781	161.743	330.238	0.489777	0.0601328	0.00145556	0.687002	0.0194598	0.0823176	0.00182546	0.782891	0.0289633	0.000830997	609.28	53.6925	530.998	11.7181	509.941	10.8762	577.095	16.3235			509.941	10.8762	3.96543	6/8 age
WK-36-75	133.425	494.764	352.278	1.40447	0.099378	0.00198585	2.28034	0.0695544	0.16432	0.00446168	0.890195	0.0754675	0.00197699	1612.96	37.0325	1206.22	21.5452	980.738	24.7084	1470.55	37.1554	1106.2	28.1	1106.2	28.1	18.6935	Concordia age
WK-36-76	23.6853	101.968	115.629	0.881855	0.0795624	0.00225292	1.34131	0.0668993	0.120883	0.0053463	0.88674	0.0527682	0.00143059	1187.04	56.63	863.799	29.0189	735.645	30.7502	1039.37	27.466	793.6	34.7	793.6	34.7	14.8361	Concordia age
WK-36-77	8.77078	93.0592	159.648	0.582903	0.0663258	0.00317628	0.342768	0.0175388	0.0381149	0.00115931	0.594435	0.0163859	0.000860722	816.665	99.995	299.267	13.2642	241.138	7.20018	328.512	17.1166	245.19	7.19	245.19	7.19	19.4239	Concordia age
WK-36-78	31.4217	235.861	739.115	0.319113	0.0549294	0.00154692	0.290662	0.0106652	0.0384987	0.00119242	0.844113	0.0146608	0.000556968	409.31	62.9575	259.08	8.39235	243.521	7.40305	294.177	11.0949			243.521	7.40305	6.00563	6/8 age
WK-36-80	36.4425	557.328	1144.74	0.486861	0.0567564	0.00145943	0.187075	0.00499411	0.0238431	0.000489427	0.768923	0.00966247	0.000260956	483.375	52.7725	174.13	4.27343	151.899	3.08267	194.363	5.22402	156.82	2.96	156.82	2.96	12.7672	Concordia age
WK-36-81	30.516	133.752	425.876	0.314063	0.0557364	0.00138495	0.446656	0.0138531	0.0577076	0.00134567	0.751852	0.0188565	0.000654819	442.64	53.6975	374.935	9.72659	361.669	8.20378	377.583	12.9904			361.669	8.20378	3.5383	6/8 age
WK-36-82	10.314	82.8055	291.893	0.283685	0.0643832	0.00320439	0.233904	0.0108861	0.0266256	0.000653442	0.527318	0.012394	0.000703856	753.71	100.915	213.417	8.9594	169.394	4.10413	248.971	14.0523	175.1	3.92	175.1	3.92	20.6274	Concordia age
WK-36-83	231.174	289.581	995.796	0.290804	0.105369	0.00210696	3.28994	0.147647	0.223384	0.00936455	0.934107	0.0697778	0.00234594	1720.68	41.51	1478.67	34.9611	1299.73	49.3499	1363.33	44.3239	1595.1	30.8	1595.1	30.8	12.1016	Concordia age
WK-36-84	50.4399	672.217	867.673	0.774735	0.0561228	0.00158105	0.28436	0.0099649	0.0365815	0.000974368	0.760077	0.0139041	0.000398895	457.45	61.105	254.111	7.87989	231.609	6.0608	279.098	7.95199			231.609	6.0608	8.85521	6/8 age
WK-36-85	19.7566	100.074	705.129	0.141923	0.0622902	0.00207136	0.207533	0.00769164	0.0240107	0.000604857	0.679699	0.0178787	0.000896162	683.345	70.365	191.481	6.46901	152.954	3.80863	358.176	17.7953	155.39	3.82	155.39	3.82	20.1204	Concordia age
WK-36-86	107.028	743.406	826.255	0.899729	0.065973	0.00150897	0.747083	0.020188	0.0816686	0.0018398	0.833666	0.0317458	0.00092472	805.555	43.515	566.531	11.7393	506.075	10.9681	631.678	18.1156	528.8	10.5	528.8	10.5	10.6713	Concordia age
WK-36-87	15.4673	253.372	447.666	0.565985	0.0577963	0.00219278	0.182309	0.00726231	0.0227103	0.000493644	0.545662	0.00790386	0.000289271	520.41	87.95	170.046	6.23804	144.763	3.11255	159.127	5.80096	146.58	3.09	146.58	3.09	14.8684	Concordia age
WK-36-88	12.4966	161.001	323.594	0.497539	0.0579514	0.00325098	0.160384	0.00920188	0.0201594	0.00058207	0.503247	0.00722982	0.000422589	527.815	128.685	151.039	8.05267	128.663	3.67877	145.605	8.48016	130.3	3.64	130.3	3.64	14.8146	Concordia age
WK-36-9	130.87	218.387	503.369	0.43385	0.1004	0.0021534	3.30205	0.121734	0.234598	0.00785543	0.908274	0.0762017	0.00231637	1631.79	40.5825	1481.54	28.7497	1358.55	41.0234	1484.34	43.504			1358.55	41.0234	8.30093	6/8 age
WK-36-90	14.1695	124.085	249.254	0.497825	0.064068	0.00303669	0.394246	0.0172033	0.044505	0.00103786	0.534421	0.0141043	0.000613347	742.6	101.843	337.466	12.5307	280.697	6.40718	283.088	12.2247	290.31	5.98	290.31	5.98	16.8222	Concordia age
WK-36-91	27.1321	339.271	513.335	0.660917	0.0561193	0.00177229	0.278195	0.00858286	0.0357919	0.000717183	0.649475	0.0116341	0.000354124	457.45	68.51	249.225	6.82023	226.696	4.46518	233.793	7.07532			226.696	4.46518	9.03951	6/8 age
WK-36-92	18.7597	65.5893	345.736	0.189709	0.0625131	0.00315676	0.364689	0.0282277	0.0403786	0.00196758	0.629549	0.0387155	0.00168526	700.01	103.537	315.71	21.0036	255.179	12.1924	767.758	32.7933	237.9	11.7	237.9	11.7	19.1729	Concordia age
WK-36-93	127.358	19.3988	426.941	0.0454367	0.125247	0.00241427	4.7798	0.10982	0.272578	0.00524176	0.836982	0.0489005	0.00384174	2032.4	33.9475	1781.36	19.3309	1553.88	26.5661	964.981	74.03	1733.7	21.5	1733.7	21.5	23.545	Concordia age
WK-36-95	96.159	73.1611	188.257	0.388624	0.180958	0.00365576	9.20892	0.232349	0.36145	0.00737964	0.809199	0.107739	0.00315117	2661.43	33.3325	2359	23.1651	1989.04	34.9588	2068.14	57.4974	2318	27.6	2318	27.6	25.264	Concordia age
WK-36-96	101.138	136.601	719.814	0.189773	0.0723661	0.00152369	1.33277	0.0398682	0.131713	0.00375092	0.952003	0.0433964	0.00131876	995.99	42.5975	860.088	17.3632	797.633	21.3702	858.638	25.5464			797.633	21.3702	7.26149	6/8 age
WK-36-97	25.7801	56.6558	806.719	0.0702299	0.0672026	0.00271752	0.220028	0.00872427	0.0237341	0.000740641	0.787015	0.0228415	0.0016001	844.13	80.5525	201.933	7.26218	151.212	4.6645	456.484	31.6193	159.72	4.54	159.72	4.54	25.1175	Concordia age
WK-36-98	81.3387	119.795	710.971	0.168494	0.0792549	0.00182433	1.31694	0.0655471	0.1174	0.00554435	0.948844	0.0430064	0.00179911	1188.89	50.4575	853.174	28.7314	715.583	31.9883	851.083	34.8646	821.3	40.4	821.3	40.4	16.127	Concordia age
WK-36-99	35.5622	402.621	669.977	0.600947	0.0546318	0.00186709	0.285852	0.0100071	0.0373972	0.000908465	0.693908	0.0119549	0.000475672	398.2	75.9175	255.289	7.9041	236.679	5.64667	240.203	9.50081			236.679	5.64667	7.28978	6/8 age

## Sheet: This study zircon trace element
190-140 Ma zicons
		SiO2	TiO2	Y	Zr	La	Ce	Pr	Nd	Sm	Eu	Gd	Tb	Dy	Ho	Er	Tm	Yb	Lu	Pb	Th	U	Note
		29	49	89	91	139	140	141	146	147	153	157	159	163	165	166	169	172	175	Total	232	238
Zircon	Inferred Age (Ma)	wt%	wt%	ppm	ppm	ppm	ppm	ppm	ppm	ppm	ppm	ppm	ppm	ppm	ppm	ppm	ppm	ppm	ppm	ppm	ppm	ppm
WK-15.3-25	168.37	32.7	0.0028	1401	519814	0.033	6.19	0.13	1.85	3.64	0.786	20.9	7.59	104	38.9	201	45.2	547	79.6	8.315	99.8	283
WK-15.3-49	169.61	32.7	0.0025	4522	575870	0.067	32.8	0.17	2.02	5.46	1.29	46.8	20.1	298	124	635	142	1640	277	43.98	584	1510
WK-15.3-9	169.82	32.7	0.0028	1526	531958	0.063	9.71	0.16	2.05	3.39	1.42	20.1	7.78	102	40.1	209	44.5	505	92.1	8.673	158	250
WK-15.3-50	170.98	32.7	0.0021	1850	514860	0.026	6.42	0.11	2.31	4.45	0.745	28.2	10.1	132	52.6	254	53.1	599	94.9	10.02	145	287
WK-15.3-31	172.597	32.7	0.0017	2147	466559	0.14	17.8	0.092	1.42	3.48	0.812	24.3	9.67	141	57.8	305	67.8	812	133	18.95	344	552
WK-15.3-87	172.94	32.7	0.0014	1380	552136	0.12	9.32	0.12	1.65	2.73	0.959	15.1	5.9	88.9	36.3	195	46	572	98.1	15.69	231	484
WK-15.3-69	173.343	32.7	0.0019	2883	524730	0.086	17.8	0.17	2.58	5.34	1.35	35.8	14.8	200	82.6	407	87.8	987	159	18.89	310	588
WK-15.3-60	175.25	32.7	0.0032	3865	534801	0.028	72.2	0.1	2.53	6.42	1.93	49.9	19.4	266	109	530	119	1450	237	44.62	994	1160
WK-15.3-18	176.26	32.7	0.0014	3027	539775	0.065	42.6	0.19	2.72	4.91	1.22	31.9	13.4	199	82.1	432	94.5	1090	191	27.79	406	854
WK-15.3-12	177.713	32.7	0.024	1724	523493	0.086	12.1	0.34	3.63	5.22	2.17	21.2	7.77	109	44.5	236	52.9	643	122	12.18	252	341
WK-15.3-67	177.8	32.7	0.0015	1440	589862	0.03	11.9	0.094	0.983	2.53	0.576	17.3	6.84	89.6	40	215	48.5	561	101	16.75	249	455
WK-15.3-42	178.16	32.7	0.0087	1528	493923	0.23	10.5	0.15	1.39	3.03	0.901	17.9	6.98	100	41.3	219	50.2	598	99.3	11.84	154	333
WK-15.3-70	178.91	32.7	0.0012	2189	548523	0.021	23.3	0.06	1.97	3.03	1.2	25.7	10	140	59.4	310	71.7	861	150	20.1	285	534
WK-15.3-26	180.57	32.7	0.0024	918.2	481416	0.11	7.3	0.023	0.787	2.29	0.588	14.6	4.93	69.5	27.1	128	29.3	353	48.8	9.203	96	255
WK-15.3-33	180.83	32.7	0.022	2564	457898	2.5	22.9	1.1	7.8	8.83	1.24	42.1	15.2	194	74.9	352	73.7	801	126	30.98	532	708
WK-15.3-35	180.84	32.7	0.0034	1539	472859	0.12	14.8	0.3	3.33	4.8	2.03	21.9	8.51	110	42.6	221	50.2	608	100	19.14	253	550
WK-15.3-43	183.59	32.7	0.0012	4314	499612	0.13	60.9	0.27	2.72	6.77	1.99	50.3	19.8	280	113	596	138	1530	273	41.65	637	916
WK-15.3-16	184.097	32.7	0.0022	2921	516418	0.057	40.3	0.2	2.81	6.81	2.61	40.7	14.9	202	79.8	398	84.7	976	170	20.96	467	477
WK-16-40	174.801	32.7	0.00052	3916	479619	0	33.9	0.059	1.52	4.59	0.551	43.5	18.2	268	112	570	128	1480	244	45.76	546	1450
WK-16-41	176.45	32.7	0.00091	2282	500779	0.048	24.5	0.063	1.87	3.74	1.39	25.5	10	148	63.3	330	78.7	971	170	17.9	277	508
WK-16-90	177.43	32.7	0.0034	2430	521414	0.07	36.9	0.2	2.64	3.77	1.35	27.9	10.8	158	66	345	80.8	939	171	44.68	303	592
WK-16-101	177.475	32.7	0.00062	2389	475113	0.13	10.1	0.13	2.9	6.66	1.35	44.6	15.8	204	73.6	338	67.4	704	103	14.36	224	416
WK-16-24	179.859	32.7	0.00039	3561	436883	0.059	10.5	0.27	4.77	9.96	2.04	63.5	21.5	284	108	507	100	1060	167	21.23	305	591
WK-16-3	180.245	32.7	0.0013	1367	460671	0.0041	10.5	0.034	0.921	2.44	0.878	17.8	6.56	92.4	38.1	198	44	495	89	5.855	87.1	150
WK-16-15	181.658	32.7	0.00065	1964	462769	0	21.3	0.094	2.11	5.14	1.69	31.4	10.6	141	55.5	284	62.6	729	128	11.73	215	298
WK-16-65	184.39	32.7	0.0017	3606	447188	0.027	35.1	0.1	2.24	6.33	3.03	48.8	18.6	258	102	512	115	1340	228	19.05	398	449
WK-16-10	185.241	32.7	0.0009	1866	457192	0	7.75	0.026	0.558	1.97	0.355	17.3	7.04	109	48.9	280	66.9	836	155	8.544	91	255
WK-16-26	185.402	32.7	0.00065	1660	465238	0.013	27.7	0.049	0.905	2.89	1.03	22.5	7.92	110	46	239	54.7	684	118	20.25	395	487
WK-16-93	185.878	32.7	0.001	1497	474615	0.0045	8.96	0.038	1.04	2.23	0.675	18.4	7.22	101	43	218	49.2	561	95.6	6.782	109	176
WK-16-2	186.22	32.7	0.0013	2150	467743	0.99	34.8	0.36	3	4.45	1.22	29.5	10.7	145	59.4	304	68.6	790	138	18.14	322	485
WK-16-107	189.291	32.7	0.0011	2020	463884	0	22.5	0.066	1.2	3.71	1.66	26.2	10.1	147	60.5	299	66.1	755	124	7.597	132	193
WK-16-68	189.57	32.7	0.0019	2553	487221	0.012	25.6	0.087	1.92	4.34	1.88	33	12.4	185	75.2	374	82.3	902	149	8.494	138	215
WK-18-100	163.84	32.7	0.00076	2161	491128	0.035	14.5	0.15	2.82	8.58	2.1	46	16.2	178	64.6	284	58.1	601	91.9	27.49	388	841
WK-18-71	164.11	32.7	0.0012	1459	514895	0.015	9.66	0.062	1.36	3.46	0.562	22.9	8.19	110	43.2	209	44	489	79.3	15.31	221	487
WK-18-20	164.26	32.7	0.0011	5023	496960	0.15	15.3	0.37	5.31	9.11	3.24	74.5	28.7	375	147	718	145	1550	280	52.32	519	1480
WK-18-2	170.249	32.7	0.0017	1662	499873	0	8.53	0.08	1.73	4.42	0.719	27.1	9.12	125	48.4	230	51.1	597	87.2	14.7	248	501
WK-18-66	171.74	32.7	0.0023	1760	432199	0.83	12.4	0.19	1.99	5.06	0.61	32.7	11.6	146	53.6	238	47.6	501	78.1	26.55	477	702
WK-18-52	172.578	32.7	0.0013	1096	466205	0.0054	7.52	0.067	1.49	2.49	0.312	17.7	6.62	85.8	32	156	33.3	342	54.5	13.71	166	456
WK-18-42	177.566	32.7	0.00069	1741	408664	0.25	9.84	0.17	2.79	5.29	1.35	36.5	11.5	141	52.5	245	50	496	88.3	13.09	165	301
WK-18-40	183.82	32.7	0.00056	2465	456689	0.044	15.5	0.14	2.97	6.14	1.58	38	13.1	170	69.1	355	79.6	926	173	25.39	399	614
WK-18-16	185.154	32.7	0.0007	2446	470417	0.0043	13.7	0.12	2.08	5.05	0.764	39.1	14.8	197	76.6	351	73.5	776	119	14.56	214	392
WK-36-42	142.86	32.7	0.00083	1889	515985	0.11	5.02	0.33	2.96	5.33	1.67	22.2	9.62	139	55.6	300	77.3	920	173	28.79	79	1200	Low Th/U: metamorphic?
WK-36-26	143.31	32.7	0.00065	1453	474950	0.32	7.17	0.1	1.25	2.09	0.312	15.1	5.76	98.9	43.5	236	59.1	695	143	32.07	208	1020
WK-36-87	143.72	32.7	0.00088	2595	474450	0.054	17.6	0.46	8.37	15.2	0.345	77.5	23.8	261	89.6	376	75.8	806	107	18.97	217	545
WK-36-55	147.62	32.7	0.00061	1097	513963	0.06	3.35	0.088	1.38	2.81	0.299	14.1	5.48	76.7	30.2	160	38.8	443	87.2	13.51	136	419
WK-36-85	148.31	32.7	0.0012	1939	531457	0.048	3.84	0.092	0.688	2.23	0.449	15.3	7.83	130	59.5	325	88.9	1040	188	19.76	100	705
WK-36-80	149.39	32.7	0.0011	1971	506197	0.13	23.6	0.28	2.73	4.76	0.927	24.9	10.8	149	60.5	313	80.6	968	147	34.4	445	1170
WK-36-101	151.82	32.7	0.0028	1827	503587	0.055	14.1	0.3	3.9	6.44	1.08	32.3	11.5	149	56.6	272	61.1	697	118	10.71	168	327
WK-36-102	153.11	32.7	0.001	3719	473829	0.099	25.6	0.38	6.96	15.5	5.4	103	31.9	329	108	463	102	1100	183	39.14	767	883
WK-36-28	157.263	32.7	0.00072	1727	513984	0.085	9.28	0.1	1.65	3.02	0.459	22.4	9.16	137	53.2	265	65.3	745	122	29.12	382	839
WK-36-59	158.591	32.7	0.00077	1593	492410	0.13	9.23	0.089	1.59	3.55	0.611	24.6	9.17	128	49.8	240	54.9	588	97.8	16.26	218	444
WK-36-68	164.16	32.7	0.00079	1629	487635	0.052	2.13	0.12	2.41	5.4	0.699	29.4	11.1	140	54.7	259	63.2	696	119	20.3	116	628
WK-36-50	164.607	32.7	0.00087	3614	492580	0.11	11.4	0.63	9.34	18.9	2.96	92.7	29.8	349	121	515	106	1030	167	33.17	462	799
WK-36-62	165.61	32.7	0.00087	2224	513739	0.014	8.41	0.15	2.83	5.82	0.773	35.4	13.2	180	69.1	336	80	878	152	19.75	184	604
WK-36-82	166.97	32.7	0.0011	1124	526016	0.064	5.91	0.052	1.2	2.31	0.705	14.8	5.47	80.7	33.5	173	42.8	491	88.3	10.31	82.8	292
WK-36-54	169.91	32.7	0.00082	2344	497541	0.76	14.7	0.82	7.7	9.39	0.747	44.7	15.8	193	73.2	345	72.4	721	124	13.54	183	385
WK-36-58	174.927	32.7	0.00074	1813	497159	0.051	15.4	0.15	2.76	5.69	0.967	29.3	10.3	138	52.8	261	61.6	655	117	27.87	449	628
WK-36-11	175.282	32.7	0.00035	2357	487691	0	14.5	0.055	1.43	5	0.205	38.5	15.1	199	75	343	72.9	758	121	50.96	644	1350
WK-36-64	181.42	32.7	0.0011	880.1	493319	1.1	6.89	0.06	0.491	1.4	0.206	9.56	4.12	59.1	24.8	127	28.6	295	51.9	33.24	185	984
WK-27.2-81	141.39	32.7	0.0025	1815	508548	0.023	23.7	0.15	2.66	5.23	1.26	27.8	10.1	135	51.4	267	57.2	645	113	8.373	195	309
WK-27.2-50	141.712	32.7	0.00014	2562	469427	0.069	10.6	0.097	0.998	4.14	1.34	33.1	14.2	197	75.3	370	79.3	842	131	70.85	965	2850
WK-27.2-11	141.892	32.7	0.00042	1384	452214	0.027	45.6	0.052	1.07	2.5	0.736	16	5.78	86.9	36.8	198	47.6	579	103	11.91	269	422
WK-27.2-39	141.963	32.7	0.00048	2541	433804	0.021	19.3	0.14	2.62	4.88	1.21	36.8	13.7	186	73.2	366	84.4	976	159	19.31	410	688
WK-27.2-28	142.106	32.7	0.00095	1606	399910	0.15	26.6	0.15	2.86	4.45	0.941	32.4	9.46	114	44.8	223	47.3	472	84.3	8.417	186	224
WK-27.2-68	143.183	32.7	0.0024	2221	460512	0	17.8	0.16	2.65	6.01	1.36	38.1	13.3	173	66.1	310	63.8	694	118	6.704	211	196
WK-27.2-45	143.596	32.7	0.0011	1843	488878	0.082	13.4	0.28	3.19	6.24	1.1	26.1	9.07	121	50	271	66.8	824	167	18.34	342	650
WK-27.2-13	147.92	32.7	0.0013	1847	420577	0	12.7	0.12	2.74	3.86	1.07	34.2	10.5	140	52.2	253	53.2	567	98.5	6.085	102	168
WK-27.2-71	150.214	32.7	0.00082	2725	493313	0.096	24.4	0.093	1.25	4.21	2.02	36.2	14.9	203	76.2	365	74.8	795	120	37.74	507	1410
WK-27.2-100	152.92	32.7	0.00032	1574	456030	0.019	5.17	0.03	0.417	1.01	0.0787	13.7	6.49	109	47.1	270	75.9	1090	170	25.09	125	941
WK-27.2-67	158.697	32.7	0.0006	1271	482738	0.0043	26.3	0.13	2.79	4.69	1.91	23.2	7.84	100	35.3	167	38	459	73.6	16.41	262	547
WK-27.2-9	161.35	32.7	0.00098	853.4	437705	0.0041	7.54	0.059	0.923	2.38	0.359	15.4	5.08	63.5	23.6	115	24.8	275	45.6	4.856	76	155
WK-27.2-98	161.504	32.7	0.0034	2448	495864	0.087	5.31	0.59	9.77	15.6	1.87	75.5	20.5	227	76.3	319	57.1	577	89.1	6.902	198	184
WK-27.2-27	162.552	32.7	0.00098	1722	446721	0.084	48.6	0.14	3.45	7.44	1.97	38.9	12.1	139	48.4	215	44.6	476	78.2	73.89	1870	1870
WK-27.2-94	169.71	32.7	0.00043	1438	485691	0.13	9.43	0.034	0.654	1.67	0.425	10.7	5.41	89.2	40.6	229	63.9	932	164	24.35	241	1100
140-90 Ma zircons
		SiO2	TiO2	Y	Zr	La	Ce	Pr	Nd	Sm	Eu	Gd	Tb	Dy	Ho	Er	Tm	Yb	Lu	Pb	Th	U
		29	49	89	91	139	140	141	146	147	153	157	159	163	165	166	169	172	175	Total	232	238
Zircon	Inferred Age (Ma)	wt%	wt%	ppm	ppm	ppm	ppm	ppm	ppm	ppm	ppm	ppm	ppm	ppm	ppm	ppm	ppm	ppm	ppm	ppm	ppm	ppm
WK-27.2-91	120.606	32.7	0.00053	4877	421568	0	23.6	0.16	2.11	5.64	0.988	56.6	21.4	320	135	683	155	1760	320	21.41	534	717
WK-27.2-25	122.931	32.7	0.0012	7081	481294	0.016	191	0.36	8.25	18.4	5.66	112	39.5	508	205	1030	239	2790	453	30.15	1130	934
WK-27.2-75	123.66	32.7	0.001	2008	519791	0.14	18.9	0.21	1.95	4.96	0.859	24.5	9.81	133	55.2	282	65.2	785	142	6.767	123	234
WK-27.2-37	126.351	32.7	0.00091	3514	518623	0.028	18.2	0.16	2.89	8.47	3.03	51.7	19.7	263	105	522	111	1240	221	6.753	173	250
WK-27.2-16	127.302	32.7	0.0014	1522	473168	0.012	25.5	0.058	1.02	2.95	0.898	17.3	6.26	95.8	40.6	230	58.6	741	129	12.88	337	512
WK-27.2-38	128.62	32.7	0.0037	2019	484650	0.28	19.6	0.14	2.03	4.72	1.53	26.5	10	135	55.6	290	68.6	823	153	9.429	230	325
WK-27.2-62	128.921	32.7	0.00035	2700	496604	0.056	92	0.16	2.91	5.63	1.49	35.5	12.5	175	72.1	381	93	1130	188	28.28	897	973
WK-27.2-63	129.312	32.7	0.00068	2002	493495	0	32	0.12	1.52	5.6	0.869	28.5	10.5	154	57.8	278	65.5	764	117	14.77	420	601
WK-27.2-101	129.4	32.7	0.00057	2215	482800	0.025	35.1	0.26	4.43	9.51	1.9	49.3	15.9	188	66.2	294	59.9	637	94	12.56	431	391
WK-27.2-54	129.797	32.7	0.00098	1808	468316	0.21	39.5	0.32	4.4	7.82	2.39	39.5	12.3	147	53.2	243	50.5	557	86.2	5.429	207	134
WK-27.2-88	129.846	32.7	0.001	1802	530220	0.16	19.1	0.078	1.2	3.41	0.626	19	7.98	114	50.9	258	64.2	795	130	9.941	211	435
WK-27.2-40	130.473	32.7	0.0015	1662	489008	0.038	22.8	0.1	2.98	7.1	1.39	28.2	9.17	111	45.2	237	56.6	685	118	7.518	148	288
WK-27.2-26	131.071	32.7	0.00098	3038	456242	0.071	26.1	0.34	4.73	9.21	1.31	48.3	17.4	223	89.7	440	97.8	1140	188	17.32	474	574
WK-27.2-80	131.182	32.7	0.00095	3121	476039	0.15	22	0.13	1.61	3.71	1.23	34.9	13.5	209	87.2	462	109	1360	227	11.78	312	441
WK-27.2-3	131.325	32.7	0.00069	1436	479629	0.038	29.3	0.091	1.36	2.79	0.813	17	6.32	88.2	36.3	198	48.1	608	110	9.204	213	358
WK-27.2-52	131.5	32.7	0.0011	829.1	455594	0.045	14.7	0.14	1.39	3.15	0.698	13.2	4.9	64.9	23.5	114	25.5	280	44.6	6.43	132	224
WK-27.2-70	131.55	32.7	0.0012	2416	495344	0.044	18.3	0.29	4.54	8.74	2.07	37.7	13.2	167	66.4	339	81.1	987	170	5.663	141	207
WK-27.2-22	131.75	32.7	0.0012	1454	354308	0.039	17.6	0.13	2.35	4.65	2.08	27.7	9.15	114	42.8	198	43.2	466	79.8	10.22	216	320
WK-27.2-99	131.983	32.7	0.00046	3546	494203	0.057	63.5	0.43	7.32	14.2	4.95	77.7	23.4	291	105	489	111	1270	187	14.34	476	465
WK-27.2-23	132.036	32.7	0.0011	1326	456398	0.51	10.1	0.25	2.14	3.43	0.984	19.3	6.98	94.9	38.2	197	44.6	526	95.2	2.993	67.5	112
WK-27.2-92	132.261	32.7	0.0016	3307	486728	0.17	23.1	0.35	5.55	12.5	4.43	68.3	21.6	270	97.2	456	95.6	1100	170	2.968	104	98.2
WK-27.2-44	132.631	32.7	0.00065	2576	489744	0.64	19.1	0.19	1.66	3.47	0.669	29.2	12.2	173	74	391	89.7	1050	188	18.38	461	635
WK-27.2-105	133.41	32.7	0.0005	4693	446955	0.069	19.1	0.14	2.17	7.51	1.34	56.7	22.1	325	134	681	160	1910	301	25.82	463	1030
WK-27.2-41	133.633	32.7	0.00066	2332	456863	0.13	13.1	0.12	1.36	3.53	0.791	25.8	10.6	155	65.8	343	81.3	1010	179	16.82	311	675
WK-27.2-32	133.863	32.7	0.0003	1419	460117	0.037	26.7	0.17	1.93	4.2	0.85	34.6	7.67	96	38.6	201	50	626	97.5	8.778	186	338
WK-27.2-18	133.894	32.7	0.00042	1900	443760	0	62.4	0.085	1.53	3.55	1.08	20.9	7.43	109	47.8	271	68.8	870	158	21.53	650	722
WK-27.2-90	134.076	32.7	0.00089	1756	445373	0.18	42.5	0.2	1.73	3.18	0.862	19.1	7.73	112	49	248	57.9	680	125	16.56	430	565
WK-27.2-108	134.675	32.7	0.00077	1439	476176	0	28.8	0.034	1.33	2.92	0.921	18.3	6.76	95.9	39.8	203	48.7	605	96.1	10.31	243	359
WK-27.2-59	134.818	32.7	0.0013	1382	477784	0.0097	17.6	0.17	2.64	5.91	1.16	22.3	7.4	96.8	37.5	191	44.8	524	91.6	7.181	164	259
WK-27.2-55	135.067	32.7	0.00038	1426	466322	0	26.1	0.097	1.47	3.32	1.16	18.9	6.95	96.5	39.6	205	51.3	644	111	9.876	230	355
WK-27.2-65	135.668	32.7	0.0017	2269	479041	0.0048	7.8	0.098	1.88	5.19	1.34	30.8	11.7	167	66.7	324	69.8	795	122	12.07	267	430
WK-27.2-31	136.233	32.7	0.0017	1269	473153	0.042	21.9	0.068	1.5	3.78	1.18	18.7	6.8	89.9	36.5	182	41.1	474	82.7	4.355	111	148
WK-27.2-30	136.388	32.7	0.0016	1833	452909	0.053	45.9	0.093	2.06	3.96	1.4	27.3	9.61	129	51.5	256	59.2	690	114	12.06	309	415
WK-27.2-76	137.817	32.7	0.00093	2479	487582	0.058	37.6	0.11	2.02	4.78	1.86	32.8	12.2	171	68.7	355	80	937	163	19.76	579	646
WK-27.2-35	138.616	32.7	0.00044	3077	490488	0.23	27.4	0.11	1.63	5.44	2.34	39.5	15.8	224	89.2	435	94.7	1050	168	45.89	733	1810
WK-27.2-2	139.144	32.7	0.0019	4777	486645	0.056	45.5	0.54	9.58	20.9	7.09	104	32.3	396	140	646	137	1530	239	5.766	187	218
WK-27.2-29	139.442	32.7	0.00055	1416	494492	0.013	27.3	0.034	0.758	2.3	0.74	14.7	6.49	92.5	39.9	213	53.4	636	113	10.14	220	369
WK-36-39	120.61	32.7	0.001	1057	556968	0.032	5.73	0.06	0.847	1.96	0.495	12.5	4.67	74.4	32.3	171	44	514	99.8	12.4	64.7	588
WK-36-10	121.284	32.7	0.00077	2314	495903	0.0071	61.5	0.19	3.26	6.3	2.63	40	13.7	189	70.7	340	76.3	824	144	17.45	440	580
WK-36-88	127.9	32.7	0.00039	1972	471329	0.17	15.3	0.13	2.48	5.25	1.02	33.6	12.5	162	60.4	283	61.5	625	110	12.5	161	324
WK-36-110	129.84	32.7	0.00032	1555	432552	0.055	13.3	0.15	1.23	3.69	0.591	19.1	7.89	113	44.9	229	49.2	562	104	19.43	197	419
WK-36-21	132.83	32.7	0.00076	1898	521520	0.14	31.1	0.37	6.64	8.12	3.08	30.8	11	141	58	294	76.3	937	168	37.86	276	1150
WK-36-44	136.39	32.7	0.0007	1628	531160	0.0091	5.84	0.041	0.79	1.87	0.34	16.9	7.6	116	49.5	260	67.9	800	140	19.63	162	775
WK-36-103	139.285	32.7	0.001	2313	482309	0.044	26.9	0.12	2.05	5.4	0.785	35.6	13.5	179	70	339	76.5	850	138	34.6	797	1180
250-200 Ma zircons
		SiO2	TiO2	Y	Zr	La	Ce	Pr	Nd	Sm	Eu	Gd	Tb	Dy	Ho	Er	Tm	Yb	Lu	Pb	Th	U
		29	49	89	91	139	140	141	146	147	153	157	159	163	165	166	169	172	175	Total	232	238
Zircon	Inferred Age (Ma)	wt%	wt%	ppm	ppm	ppm	ppm	ppm	ppm	ppm	ppm	ppm	ppm	ppm	ppm	ppm	ppm	ppm	ppm	ppm	ppm	ppm
WK-15.3-4	202.42	32.7	0.0035	3011	526912	0.47	57.8	1.6	18.8	23	4.99	89.1	26.2	287	89.2	359	64.8	642	86.6	85.93	2520	1250
WK-15.3-77	213.716	32.7	0.0024	5580	467236	0.14	33	0.41	8.58	16.3	3.12	102	34.4	460	166	749	155	1710	233	43.82	874	1100
WK-15.3-71	215.76	32.7	0.00013	1658	478848	0.033	16.4	0.06	0.873	2.77	0.285	18.7	7.68	107	44.6	231	55	751	105	37.09	469	977
WK-15.3-81	217.969	32.7	0.00053	1908	453320	0.021	7.39	0.28	4.05	7.86	1.5	41.3	14.2	163	52	225	43.4	452	66.6	61.78	496	1570
WK-15.3-29	224.58	32.7	0.0016	2173	551278	0.25	18	0.85	7.81	10.7	3.73	43.6	14.3	178	61.5	270	53.8	568	80.4	65.66	527	1820
WK-15.3-27	225.19	32.7	0.0034	1521	512329	0.96	11.4	1.8	13.5	13.1	4.68	33.1	10.7	124	38.9	182	38.1	439	73.8	81.2	470	2160
WK-15.3-66	228.393	32.7	0.0034	2023	533129	0.23	11.9	0.59	9.32	13.6	1.3	57	15.8	175	57.7	243	47.1	502	69.2	53.32	542	1400
WK-15.3-51	229.53	32.7	0.00075	2557	541885	0.86	13.3	0.95	8.97	14	2.04	68	20.4	231	72.8	300	54.4	554	81.6	64.98	698	1640
WK-15.3-38	231.65	32.7	0.0011	1308	496558	0.41	15.9	0.97	8.58	10.8	2.61	36.2	11.4	127	39	168	32.8	352	44.4	62.66	616	1490
WK-15.3-8	232.29	32.7	0.0074	2431	520248	0.69	19.6	0.54	5.84	8.88	1.72	43.6	15.4	186	68.6	312	64.1	657	105	40.44	510	909
WK-15.3-76	236.02	32.7	0.0012	1543	530887	0.14	10.3	0.62	5.52	8.21	2.4	30.6	10.7	132	42.4	191	38.8	405	61.6	70.02	730	1650
WK-15.3-55	237.22	32.7	0.0047	2395	528409	0.7	17	0.61	9.32	15.8	1.96	69.1	19.8	218	70.9	298	52.8	544	79.4	40.74	664	702
WK-15.3-19	237.983	32.7	0.0025	2803	526070	1.1	15.7	1.3	10.7	16.4	3.33	73	23.4	260	80.2	331	63.6	627	89.4	88.82	759	2190
WK-15.3-32	239.44	32.7	0.0021	1928	467865	0.56	21.4	1.2	18.9	26.1	3.41	87.1	21.7	210	60.3	228	41	434	50.8	36.07	567	597
WK-15.3-23	239.792	32.7	0.0006	561.4	538603	0.016	3.92	0.095	1.09	2.12	0.633	9.25	3.51	43	15.3	70.7	14.8	165	26.3	24.86	160	649
WK-15.3-73	240.75	32.7	0.0012	2255	520730	0.86	23.9	1.7	12.8	14.6	3.93	46.7	16.2	188	63.2	278	56.3	579	82.8	98.07	748	2450
WK-15.3-17	242.754	32.7	0.0042	4676	513067	0.88	43.8	2.5	19.1	24.7	11.2	101	35.5	424	140	594	112	1140	166	147.6	2710	3310
WK-15.3-1	243.5	32.7	0.00082	3343	549693	0.34	21.4	1.6	20.5	31.4	5.3	125	33.7	334	96.7	377	68.4	670	96	80.81	834	1800
WK-15.3-37	246.616	32.7	0.00051	1445	441642	0.63	16.1	0.63	6.21	8.53	1.68	38.9	11.7	128	41.9	179	35	374	51.9	76.43	893	1700
WK-15.3-63	248.79	32.7	0.0011	1087	537516	1.1	14	1.3	9.42	10.4	3.08	38.1	10.2	99.4	28.3	108	20.1	213	32.3	32.42	222	746
WK-16-45	200.15	32.7	0.0013	1154	453560	2.1	24.9	0.58	4.46	3.19	0.641	16.8	6.35	80.5	32.5	164	35.2	394	70.7	7.611	119	174
WK-16-13	203.53	32.7	0.00067	1251	457131	0.0042	13.5	0.023	0.803	1.98	0.82	14.4	5.58	83.8	34.8	188	41.5	487	86.8	6.218	74	159
WK-16-18	204.62	32.7	0.00083	1547	436971	0.21	14.4	0.17	1.66	2.51	0.525	19.6	6.79	99.7	42.3	216	47	546	97.9	23.65	351	525
WK-16-28	234.399	32.7	0.00044	1256	476803	0.037	8.01	0.17	1.86	3.57	0.548	20.3	7.48	95.1	35.5	159	33.4	356	55.3	56.07	327	1410
WK-16-33	236.512	32.7	0.00052	1341	445281	0.29	10.9	1.3	11.8	11.8	4.07	31.6	10.3	115	38.7	175	36.8	405	64.6	107.6	655	2640
WK-16-38	207.3	32.7	0.0011	1696	447249	0	6.26	0.16	1.72	6.04	0.293	29.1	10.6	131	49.6	233	46.4	488	78	15.36	187	371
WK-16-62	202.26	32.7	0.0012	1206	493488	0	11.2	0.016	0.716	2.26	0.544	16.2	6.22	86.6	35.3	175	39.2	470	75	13.68	193	332
WK-16-66	203.53	32.7	0.0013	907.2	475827	0.38	5.15	0.15	1.11	1.82	0.227	12.1	4.62	63.9	25.2	125	27.6	308	49.4	5.592	58.3	153
WK-16-80	207.5	32.7	0.0005	1374	432830	0.63	17.5	0.28	2.17	4	0.535	23.9	7.44	101	39.3	190	38.8	438	75.5	38.21	638	691
WK-16-82	237.65	32.7	0.0031	1318	518398	0.54	36.7	1.2	10.9	9.56	8.36	27.7	8.9	102	37.6	177	41.3	521	96.1	58.16	464	1430	non-equilibrium processes? +ve EU anom
WK-16-76	244.74	32.7	0.0011	1432	485074	0.93	14.3	0.88	6.38	6.35	2.69	28.7	10	119	39.6	183	37.5	391	59.2	83.79	638	2040
WK-16-27	246.168	32.7	0.00097	1150	504568	0.16	9.6	0.6	3.84	5.9	1.55	22.1	7.81	90.8	32.2	147	30.3	341	53.4	80.65	511	1890
WK-16-92	246.538	32.7	0.001	1522	476613	0.031	9.75	0.14	2.52	5.98	0.72	32.3	10.3	126	46.1	202	42	457	69.9	26.72	353	521
WK-16-8	247.765	32.7	0.0014	1406	490883	1.2	14.7	0.5	4.2	5.12	1.06	27.9	9.27	109	39	180	36.5	397	62.9	32.1	257	726
WK-16-34	247.933	32.7	0.00038	784.2	478565	0.03	3.37	0.047	0.606	2.06	0.287	11.2	4.25	56	20.3	98.5	21.3	244	37.8	58.64	256	1440
WK-16-110	247.94	32.7	0.00066	3393	517914	1.5	26.4	1.1	11.8	20.1	2.29	97.8	30.6	335	107	427	78.4	742	105	88.44	1320	1660
WK-16-4	248.54	32.7	0.00057	666.1	484612	0.01	8.6	0.077	0.749	1.04	0.978	8.47	3.1	41.8	16.7	84.6	21.1	259	41.4	34.59	182	934
WK-18-1	239.88	32.7	0.0012	2506	497659	0.41	9.39	0.9	9.68	19.4	6.91	93.2	25.6	236	76.5	317	63.7	658	101	55.44	487	1170
WK-18-10	230.81	32.7	0.0014	1960	534754	0.16	6.46	0.44	6.05	14.9	5.82	68.5	19.2	198	59.6	239	45.8	454	72.1	34.44	207	887
WK-18-14	231.01	32.7	0.0015	1076	491877	0.089	3.24	0.19	2.46	4.69	2.56	25.2	8.69	100	32	154	32.9	385	58.8	65.87	130	1810	Low Th/U: metamorphic?
WK-18-21	218.83	32.7	0.001	2047	477474	0.38	16.2	0.6	7.64	11.6	2.98	53.7	16.9	187	61.7	265	52.5	565	80.1	60.32	833	1310
WK-18-25	218.95	32.7	0.0018	1779	474901	0.36	9.65	0.93	11.2	17.4	6.55	66.3	18.4	184	52.8	205	41.8	432	60.3	77.87	580	1920
WK-18-29	219.67	32.7	0.0012	1803	519096	0.1	10.9	0.5	6.55	11.6	4.5	49.4	15.7	164	51.4	211	42.6	437	72.5	47.61	337	1230
WK-18-4	220.63	32.7	0.0021	2569	497423	0.5	15.8	1.3	13.8	21.4	8.33	85.2	25.5	262	74.7	303	57.9	577	79.2	69.82	430	1830
WK-18-46	211.46	32.7	0.009	1424	475024	0.092	4.11	0.51	4.96	11.7	6.68	52.5	15.6	154	40.8	157	27.8	269	40.9	24.33	200	678
WK-18-48	207.084	32.7	0.00061	1258	475188	0.19	9.93	0.062	1.19	3.8	0.408	19.3	7.18	96.4	38.8	184	41.9	463	72.8	15.13	174	382
WK-18-63	231.58	32.7	0.0014	2588	505334	0.079	7.69	0.21	3.42	7.64	1.7	48.9	16.7	214	75.4	340	69.2	720	115	67.72	430	1490
WK-18-64	239.824	32.7	0.0018	1298	467070	0.015	2.68	0.17	2.42	6.98	0.168	36.2	11.6	126	37.8	155	29.6	300	43.3	15.43	150	363
WK-18-73	200.89	32.7	0.00094	1973	501414	0.36	11	0.82	8.79	23.1	11.7	134	26.1	221	56.7	217	39	367	57.7	39.37	286	863
WK-18-75	225.317	32.7	0.0013	1938	515498	1.3	22.4	0.79	8.4	13.4	4.33	61	18.7	195	59.9	241	46	451	68.4	69.99	833	1580
WK-18-78	214.8	32.7	0.0016	2330	497618	0.51	10.3	1.2	13	22.7	8	88.4	24.2	242	69.7	275	53.7	571	82.4	72.04	516	1800
WK-18-85	231.25	32.7	0.0014	2043	479740	0.24	40.5	0.5	8.32	15.8	5.83	65.3	19.5	198	60.8	249	49.7	526	80.2	61.84	873	1290
WK-18-92	228.594	32.7	0.00076	2153	429656	0.31	10.8	0.48	7.07	12.4	1.37	60.9	19.3	207	67.5	268	52.1	508	76.3	27.4	488	473
WK-18-97	215.122	32.7	0.002	2701	473557	0.73	13.2	0.72	10.1	22.9	10.4	97.8	29	286	82.8	322	59.8	594	81.9	66.21	646	1750
WK-18-57	241.86	32.7	0.0046	1839	477408	0.45	5.5	0.3	3.38	8.77	8.37	47.7	14.2	162	56.7	248	51.5	548	88.6	21.03	191	441	non-equilibrium processes? +ve EU anom
WK-18-101	244.451	32.7	0.00086	925.8	450753	0.082	4.99	0.34	5.83	8.14	1.33	39	10.4	98.4	30.1	111	21.4	210	30.1	16.7	125	402
WK-18-7	245.122	32.7	0.00097	1685	491273	0.026	31.8	0.12	2.43	5.39	2.18	29	9.41	116	45.1	233	55.1	666	122	30.11	485	522
WK-18-89	246.972	32.7	0.0019	1640	456103	0.005	9.84	0.13	2.2	6.4	0.513	32.1	11.3	138	49.5	222	45	473	69.7	54.89	477	1210
WK-18-47	247.323	32.7	0.0005	1153	453018	2.2	14	0.94	4.42	4.23	0.529	22.6	7.75	98.6	34	148	30.3	327	47.6	50.45	412	1160
WK-18-79	249.66	32.7	0.00079	2154	461044	0.081	8.79	0.77	14.1	22.1	6.6	80.9	21.1	214	64.8	261	51.6	534	74.1	17.44	216	310
WK-27.2-58	218.697	32.7	0.001	3861	458699	0.52	24.2	1.4	19.8	43.2	8.26	171	45.2	427	114	414	75.3	740	103	84.48	1070	2050
WK-27.2-42	219.551	32.7	0.00069	3437	495240	0.079	14.8	0.14	1.8	6.14	0.851	53.3	20.5	277	105	488	96	970	155	100.4	1060	2420
WK-27.2-74	237.877	32.7	0.0006	2396	464589	0.36	13.3	0.37	5.12	9.34	0.958	57	16	192	71	302	56.8	577	92.6	26.23	445	426
WK-27.2-84	240.058	32.7	0.00059	1644	517550	0.015	13.6	0.16	2.65	5.6	0.745	33.1	11.2	133	49.8	229	46.2	514	78.3	18.83	219	412
WK-27.2-61	243.37	32.7	0.0054	2477	488702	0.072	25.4	0.46	6.47	14.4	6.37	68.8	18.8	218	73.6	325	66.3	700	108	11.96	259	166
WK-27.2-89	244.644	32.7	0.0011	1381	475502	0.014	11.2	0.13	2.25	5.34	0.334	29.1	9.4	119	41.6	182	36.1	393	55.6	22.76	270	512
WK-27.2-106	245.5	32.7	0.00049	1662	463860	0.0049	27.4	0.098	2.8	5.4	0.591	28.1	10.3	131	47.4	221	45.7	507	72.1	37.9	481	754
WK-36-60	201.87	32.7	0.00046	1016	462237	0.033	14.5	0.075	1.62	2.1	0.422	11.7	4.63	70	29	158	37.1	411	77.8	18.47	54.8	307
WK-36-5	208.763	32.7	0.001	3320	483207	0.065	176	0.25	5.2	12.6	3.12	62.2	20.8	258	94.9	471	105	1230	203	82.88	1240	1430
WK-36-47	209.1	32.7	0.00051	1230	488217	0.028	15.1	0.049	0.891	1.45	0.282	13.3	5.96	83.9	36.2	193	48.8	554	105	29.6	176	557
WK-36-30	209.545	32.7	0.00043	993.7	515183	0	5.51	0.041	0.729	1.79	0.278	11.9	4.68	66.7	27.6	148	35.2	404	71.3	21.96	238	545
WK-36-100	209.81	32.7	0.0012	1516	492070	0.01	16.8	0.16	3.01	6.19	2.25	37.3	11.4	137	47	200	40.9	425	64.8	11.33	124	259
WK-36-33	215.769	32.7	0.001	1930	486558	0.084	14.1	0.53	8.14	13	3.46	56.5	15.9	176	57	246	53.2	581	98.9	47.29	544	1060
WK-36-57	217.02	32.7	0.0006	1321	506758	0.025	2.58	0.03	0.635	1.19	0.139	12.2	5.99	91.3	39.1	218	52.9	626	120	30.19	143	676
WK-36-108	219.172	32.7	0.0014	3129	476161	0.19	25	0.32	4.22	10.3	2.3	72.3	23.1	271	97.4	434	93.7	976	156	56.34	1140	960
WK-36-16	220.242	32.7	0.00046	1428	491270	0.014	21.7	0.042	0.821	2.61	0.566	16.6	6.73	96	40.8	213	51.9	615	117	24.9	410	447
WK-36-106	221.16	32.7	0.0015	1305	525082	0.04	7.74	0.23	5.31	9.65	2.13	43.1	12.1	124	39.4	163	32.5	331	59.2	17.61	217	338
WK-36-91	226.696	32.7	0.00064	1870	515642	0.0093	17.8	0.086	2.21	5.31	0.564	30.9	10.7	143	56.1	274	63	658	118	27.13	339	513
WK-36-66	227.32	32.7	0.00049	1868	506646	0.023	6.25	0.016	0.314	1.82	0.321	18	9.14	145	58.1	288	65.9	688	123	17.83	22.3	426	Low Th/U: metamorphic?
WK-36-84	231.609	32.7	0.00081	1049	466415	0.058	23	0.23	2.24	2.44	1.1	11.2	4.64	67.9	29.8	156	43.7	564	108	50.44	672	868
WK-36-43	235.143	32.7	0.00035	1126	468806	0.023	39	0.12	1.82	3.76	1.19	21.1	6.54	82.8	30.5	147	34.1	399	74.5	41.7	495	800
WK-36-34	239.04	32.7	0.0011	2208	505417	0.081	53.5	0.49	9.19	15.5	5.14	56.6	17.3	202	70	310	66.2	696	109	15.92	271	246
WK-36-69	239.96	32.7	0.0019	2034	504853	0.034	1.43	0.1	2.41	6.15	0.335	40.5	14.3	178	65.1	284	56.5	554	89.2	13.35	75.3	255
WK-36-73	238.699	32.7	0.0009	1512	507907	0.12	17	0.22	3.67	6.34	1.29	28	9.59	117	44.5	214	50.8	580	100	63.83	603	1260
WK-36-77	237.21	32.7	0.0015	1546	522044	0.0099	38.5	0.089	1.72	5.22	2.28	31	10.1	132	48.2	230	47.5	499	82.9	7.767	81.7	86.9
WK-36-99	236.679	32.7	0.00044	1202	489936	0.012	16.2	0.18	3.99	5.46	1.27	24.1	7.52	90.1	34.5	161	39.9	482	81.3	35.56	403	670
WK-36-78	243.521	32.7	0.00031	706	500380	0.32	6.4	0.16	1.67	1.9	0.544	10.8	4.13	53.3	20.8	110	27.5	318	56.4	31.42	236	739
*Note: No correction has been made to these data. The Pb column in the supplementary data represents total Pb

## Sheet: Data used in Fig. 1
	LATE PERMIAN-TRIASSIC SAMPLES N=663																		JURASSIC SAMPLES N=481																					EARLY CRETACEOUS SAMPLES N=1196
	Kuching (Breitfeld et al., 2016)			Sadong 1 (Breitfeld et al., 2016)			Sadong 2 (Breitfeld et al., 2016)			Ngili 3 (B&H, 2018)			Karimunjawa 1 (Witts et al., 2012)			Karimunjawa 2 (Witts et al., 2012)			Kuayan (Wang et al., 2022)			Ketapang 2 (Wang et al., 2022)			WK16*			WK18*			Bengkayang 1 (Wang et al., 2022)			Bengkayang 2 (Wang et al., 2022)			Bengkayang 3 (Wang et al., 2022)			Kerabai (Wang et al., 2022)			Lubuk Antu 2 (Zhao et al., 2021)			Lubuk Antu 3 (Wang et al., 2021)			WK15.3*
Count	129			130			142			75			107			80			29			59			77			86			80			71			79			90			101			81			57
Minimum	221			205			212			216			220.209			218.464			180			184			174.49			167.54			153			154			154			129			114.741			119			119.37
Max	3436			2544			2732			1899			2439.72			1776.23			2568			1893			2318.21			2115.9			2606			2453			2728			2428			3124.08			2632			2557.72
	Data	Err (1 sigma)		Data	Err (1 sigma)		Data	Err (1 sigma)		Data	Err (1 sigma)		Data	Err (1 sigma)		Data	Err (1 sigma)		Data	Err (1 sigma)		Data	Err (1 sigma)		Data	Err (1 sigma)		Data	Err (1 sigma)		Data	Err (1 sigma)		Data	Err (1 sigma)		Data	Err (1 sigma)		Data	Err (1 sigma)		Data	Err (1 sigma)		Data	Err (1 sigma)		Data
	2340	10		1884	21		2244	7		258	2		220.209	8.92587		218.464	5.44757		208	3		201	6		378.2	7.88		262.27	4.83		153	3		154	2		154	3		129	4		253.874	4.14592		119	2		253.74
	2011	16		1858	12		1824	18		1899	47		224.942	8.92148		234.273	5.80987		180	3		184	5		185.241	3.67918		233.37	4.27		154	3		155	2		156	2		129	4		269.191	3.65031		122	3		177.713
	1883	20		1937	12		1867	8		1829	30		229.858	7.96308		234.957	6.18231		231	3		199	5		177.475	3.47444		168.93	3.14		155	3		160	3		156	2		131	4		159.939	5.75213		122	3		184.097
	3436	11		1881	11		1863	9		257	3		231.04	8.21079		236.821	5.808		280	4		198	5		192.96	5.25		244.451	5.65556		160	4		162	2		157	2		132	3		434.355	11.541		123	3		242.754
	249	3		1844	9		1842	16		216	2		231.786	9.16389		240.735	6.67455		255	4		197	6		238.62	5.83		1998.15	57.245		160	4		168	3		157	2		134	4		196.521	6.75972		123	4		175.15
	361	4		1898	14		1841	15		244	2		232.408	9.53638		241.293	6.30149		451	6		198	7		232.266	5.03052		303.6	5.38		160	3		170	3		157	3		135	2		254.006	3.12051		124	4		237.983
	284	3		2532	22		475	5		251	2		233.092	8.3332		241.728	6.67369		441	6		200	6		189.291	4.3709		1994.44	49.6875		161	3		177	3		158	2		137	2		3124.08	80.2475		124	3		1111.59
	234	3		1862	7		1883	11		249	3		236.262	9.28386		241.79	7.54291		431	7		194	5		242.73	3.91		1801.2	21.8		169	5		184	3		158	2		138	2		2058.94	20.215		124	2		239.792
	1872	11		1874	16		1867	6		250	2		236.883	9.0347		243.466	6.17558		565	8		204	5		2257.1	29.785		199.61	5.31		171	6		189	3		158	3		138	2		471.205	6.50868		127	4		174.57
	234	3		263	3		1865	5		241	2		239.741	9.07212		243.963	6.05105		563	8		197	5		202.74	4.33		261.206	5.4241		175	6		189	3		160	3		139	3		136.297	1.93691		127	4		194.68
	1860	14		2544	8		2143	7		269	3		241.542	8.57343		244.398	6.29898		622	8		1094	70		181.658	3.68597		1924.08	44.7525		178	3		192	4		161	3		140	2		136.331	1.53045		129	4		243.86
	1864	16		1830	12		1866	8		241	2		243.591	8.19894		244.708	6.79523		807	10		196	6		189.41	5.38		1887.04	38.1175		178	3		194	3		161	2		140	2		253.103	4.80644		129	4		232.75
	2261	9		1881	10		225	2		251	2		244.273	8.81896		246.569	5.92495		968	12		194	5		192.513	3.57293		2115.9	27.3		178	3		199	3		162	3		141	2		394.952	5.92405		132	2		172.597
	363	4		1934	10		1841	15		252	2		244.646	8.69445		246.818	6.66928		1036	33		188	5		195.53	3.47		235.71	3.88		180	5		199	3		163	5		143	3		125.8	1.97741		133	4		238.85
	2058	10		1896	10		257	3		249	3		245.39	9.89545		248.617	7.66012		1040	31		198	5		182.89	3.86		185.154	3.54437		180	5		201	3		163	3		146	3		280.051	5.26481		138	3		177.51
	1806	14		267	3		1856	10		366	4		245.577	9.27471		250.539	6.54204		1057	40		204	6		250.78	4.13		172.23	3.59		182	6		201	3		164	3		152	3		2457.71	20.37		148	4		324.02
	245	3		1865	32		1858	12		364	4		246.632	9.64594		258.843	6.41116		1570	37		197	6		268.09	4.37		1917.59	32.5625		184	3		202	3		165	3		157	2		177.095	2.35769		164	4		191.08
	252	3		1841	18		461	5		251	5		246.818	8.56815		281.838	7.99657		1792	29		205	5		2318.21	23.15		170.249	3.55534		185	3		203	3		166	2		157	2		2149.99	20.9875		166	5		246.616
	1863	19		1838	15		1866	9		266	2		247.624	8.93955		284.183	7.13048		1810	36		200	5		179.859	3.28876		194.2	3.25		187	3		203	3		167	4		158	2		328.601	9.05433		166	4		238.99
	239	3		251	4		263	3		255	2		247.686	10.2652		285.54	9.47271		1830	29		198	5		190.951	4.09987		222.9	4.53		187	4		204	3		170	3		179	5		140.739	1.55271		173	3		210.96
	1773	23		251	3		1872	10		240	3		247.686	8.56728		287.698	7.86699		1851	29		197	6		185.402	3.78423		1991.05	38.115		187	3		204	3		171	3		180	5		475.257	6.33711		182	5		250.306
	1814	17		242	3		2526	10		349	5		249.299	10.5114		294.907	10.569		1853	35		198	6		246.168	4.75384		1861.42	40.895		187	8		204	3		172	3		181	3		2656.48	19.755		194	4		266.63
	358	4		352	4		258	3		256	2		249.733	10.0148		319.493	7.83362		1855	27		196	6		234.399	4.52836		1881.17	35.3375		188	9		205	3		172	4		181	5		382.908	5.67999		236	6		184.76
	1850	27		1889	8		424	5		254	2		250.043	9.76642		329.239	11.1312		1859	27		189	6		1858.95	38.89		230.34	4.72		188	5		205	3		172	4		182	5		318.825	4.71643		239	6		183.75
	1881	11		1878	12		254	3		265	2		252.213	10.88		333.709	7.45149		1863	40		1893	61		180.245	3.84924		194.37	4.21		215	4		205	3		172	4		182	2		207.564	2.60548		243	7		190.976
	1860	11		2199	13		292	3		252	2		252.895	10.0113		337.932	7.692		1891	30		193	5		243.97	4.91		256.139	5.18782		219	4		205	3		173	3		183	5		959.332	12.1247		244	7		272.104
	250	3		486	6		2732	10		247	2		253.267	10.669		342.09	8.1768		2125	26		190	5		189.96	4.79		262.87	5.15		221	7		206	3		173	5		186	4		331.671	5.11259		246	6		175.94
	232	3		2330	30		1871	5		252	3		253.949	9.88623		344.902	7.80708		2488	29		202	6		236.512	4.63726		228.24	3.96		234	3		206	3		173	3		188	3		271.865	3.1799		249	6		181.94
	1899	11		1856	8		1824	25		250	2		254.32	9.63795		346.734	8.1717		2568	28		200	6		247.933	4.58508		172.35	3.11		237	3		206	3		173	4		192	3		692.594	11.0315		251	7		229.53
	1895	11		1916	11		2164	8		252	2		254.32	9.42823		349.239	9.75663					194	6		353.391	6.16823		570.347	11.9431		238	3		206	3		174	3		196	3		2220.68	29.015		252	7		2486.73
	2059	9		1827	16		462	6		251	2		274.121	11.1002		349.788	30.394					195	5		1987.35	25.15		1041.4	16.5		240	4		207	4		174	4		200	3		1834.88	22.995		252	7		253.73
	1863	12		255	3		1856	12		249	2		274.924	10.3579		351.131	8.16686					195	6		206.18	3.79		210.33	5.07		242	3		207	3		174	4		201	3		1831.79	25.465		258	7		179.63
	1838	15		1879	15		2446	13		251	2		277.641	11.7132		352.84	8.16499					211	7		245.61	4.39		1719.3	21.2		247	4		207	3		174	4		208	3		181.091	1.97902		260	4		2557.72
	1647	37		264	3		1860	8		268	4		278.073	9.15436		357.721	8.2816					195	8		174.801	3.14266		630.004	13.1841		248	3		207	3		174	3		221	3		449.189	4.7612		261	7		263.27
	1853	10		401	5		1866	13		262	2		278.258	9.64809		360.587	9.1318					195	5		174.49	3.77		1987.04	43.36		249	3		208	3		176	3		224	3		1821.91	28.55		266	7		446.2
	1866	12		2230	30		1864	12		254	2		292.074	11.6936		360.83	8.52195					196	5		1973.15	34.255		234.81	3.98		253	4		209	6		176	3		229	3		177.515	2.75619		268	4		206.52
	1875	14		305	6		250	3		233	2		317.345	10.2162		362.659	8.64171					200	6		197.99	5.01		191.67	3.57		265	7		209	6		176	3		229	6		299.293	4.30257		272	7		228.393
	1873	14		1866	13		273	3		248	2		334.26	10.9295		365.218	8.51689					186	5		1855.56	37.0375		1777.2	23		266	7		209	6		177	3		231	3		534.15	5.78146		272	5		185.72
	1877	17		1891	13		1873	8		245	2		338.299	11.5087		370.698	9.36264					195	7		1858.95	30.4		177.566	4.14899		269	7		210	5		178	3		232	7		155.829	1.87514		283	8		173.343
	373	4		1868	8		1866	11		249	2		338.727	11.2904		372.462	8.87361					194	5		197.33	4.28		199.693	5.05451		270	7		210	5		178	5		232	3		468.432	5.31473		285	8		183.41
	1852	17		249	3		1862	13		249	2		340.806	11.5054		396.027	7.99647					215	7		1842.6	33.49		446.08	8.61333		293	8		210	6		179	3		233	6		126.178	1.85116		292	8		215.76
	1872	14		1875	9		261	3		425	4		340.867	10.9205		401.844	9.32274					197	5		1857.41	31.0225		222.36	4.23		1888	29		210	6		179	3		233	3		472.265	36.1075		297	9		119.37
	2278	11		1776	20		1845	14		258	3		344.352	11.7451		423.31	9.53683					204	7		258.22	5.75		247.323	4.766		1835	29		210	6		179	5		234	3		114.741	1.57391		440	11		258.42
	242	3		1871	13		2423	13		263	3		345.818	12.3541		424.155	9.05285					193	6		2113.27	40.5875		207.084	4.82216		1865	32		210	8		179	4		236	6		153.685	1.74719		447	12		301.8
	2374	22		1859	12		1838	12		252	3		349.116	10.7871		427.655	9.28983					198	5		1791.66	33.335		1902.16	37.195		1830	30		210	6		180	3		236	7		1887.04	37.035		447	12		247.41
	263	3		1860	11		259	3		243	2		350.704	12.2249		432.359	9.88667					199	6		1842.7	25.6		172.578	3.53183		1863	28		210	6		181	3		236	3		449.491	4.92919		489	12		213.716
	2506	12		327	4		1872	15		253	2		351.925	11.8569		474.06	10.5486					207	7		2065.7	29.2		1799.1	22.9		1844	29		210	6		181	3		238	6		436.999	4.35587		573	15		270.524
	1855	9		1872	13		260	3		248	3		354.854	10.9014		512.635	9.65867					199	6		198.29	5.05		1933.34	35.9525		1842	26		210	6		183	5		263	6		2499.69	21.9175		678	11		232.29
	1870	23		2231	10		2409	15		258	2		354.976	12.0967		1158.8	13.4146					196	8		1876.24	31.48		1927.47	32.255		1787	64		211	7		184	4		270	3		151.886	1.68471		736	11		217.969
	1883	10		252	3		250	3		238	2		355.403	11.9741		1322.82	24.0454					196	5		181.18	3.55		257.493	5.69711		1864	27		211	5		184	5		311	4		144.238	1.97152		749	11		312.104
	1851	13		244	3		1870	20		253	2		357.172	11.1422		1395.53	12.0053					194	5		191.78	6.12		261.36	6.93		1847	28		211	6		185	3		313	5		263.316	2.92289		766	19		1515.5
	1877	11		1901	10		261	3		251	2		357.416	11.2638		1400.28	25.2866					192	5		192.76	3.43		220.17	4.43		1818	35		211	5		186	3		318	5		1857.41	25.925		892	22		194.61
	1857	15		1876	10		2272	11		252	2		358.941	10.8958		1404.37	25.6078					195	6		190.03	3.96		272.714	5.82776		1841	26		211	5		186	4		335	5		2481.17	20.2175		925	23		271.003
	1856	13		1853	12		1863	11		248	3		363.512	11.1333		1405.45	28.6128					197	5		250.32	5.58		1845.99	33.18		1844	26		211	7		186	3		362	6		481.018	6.43415		1176	51		176.89
	1879	12		378	5		1865	8		251	3		365.096	11.2529		1408.89	25.5516					191	6		260.02	5.45		245.444	4.62517		1847	28		211	5		187	2		370	5		1887.35	25.6125		1039	69		196.436
	1871	25		1879	8		1864	10		253	2		367.532	12.4442		1413.81	12.4273					204	5		194.474	3.86411		219.19	5.18		1867	31		212	5		188	8		396	5		1787.04	50.3125		1655	49		177.47
	1859	13		1882	9		1858	10		1894	40		368.75	11.613		1414.88	15.2965					197	7		1934.1	21.4		239.71	4.1		1855	29		212	6		188	3		397	5		1809.57	150.005		1094	58		291.02
	1980	11		1805	14		440	5		252	2		372.402	12.9238		1415.74	16.3102					199	8		237.98	4.84		239.824	4.99564		1859	30		212	5		188	4		410	6		164.06	2.32158		1488	47
	1890	15		1879	12		252	3		234	2		381.34	11.473		1416.8	12.5378					195	5		239.71	4.7		1854.02	33.7975		1883	26		212	7		190	3		412	5		1079.63	27.775		1399	46
	1892	17		1856	16		2094	14		256	3		382.919	12.7861		1420.85	14.9187								190.49	3.94		177.98	3.32		1850	26		212	6		190	3		480	6		375.262	7.58874		1841	42
	2422	11		2009	9		1875	11		250	2		401.117	12.5347		1422.34	12.6873								276.98	9.22		264.24	4.89		1876	31		212	7		193	3		485	6		2354.02	19.7525		1708	44
	1869	15		1927	10		2050	14		251	2		421.439	13.8144		1423.83	13.0261								247.765	4.0414		245.122	4.58359		1862	25		212	6		195	3		490	12		2173.15	22.8425		1454	46
	1900	10		1853	9		1854	15		256	2		426.992	12.9756		1424.89	12.51								203.05	4.29		1875.93	39.195		1878	64		214	3		199	3		491	9		1924.38	25.465		1853	44
	2535	10		1836	13		1867	17		247	3		441.214	12.8312		1425.74	14.886								256.88	4.45		167.54	3.06		1890	57		230	3		199	4		519	13		1809.26	25.9275		1737	58
	1940	12		1892	10		1853	13		269	3		458.589	15.0727		1433.99	13.3453								233.1	4.01		207.56	5.37		1897	55		259	4		205	3		527	7		710.437	7.02625		2632	36
	1876	14		1846	12		1855	6		1861	33		852.122	24.2954		1436.52	16.9176								254.055	4.25578		1883.5	21.4		1855	66		277	4		206	3		530	8		1842.29	22.225		1879	46
	1864	11		2432	7		1858	12		249	5		1329.84	14.2505		1437.37	13.1703								254.062	5.19328		225.317	3.98049		1870	66		469	7		209	3		632	10		977.529	9.88192		1818	55
	221	3		1874	10		1846	13		250	2		1353.17	13.5434		1438	17.5592								258.892	5.17316		1987.04	34.72		1883	52		498	6		216	3		694	10		160.634	1.66237		1918	42
	2056	12		2098	10		1841	32		1858	47		1321.91	17.2793		1442.41	13.1398								175.79	3.94		235.69	4.09		1890	54		1717	54		233	4		756	10		2505.86	22.995		1838	44
	1831	14		2096	10		2142	15		240	3		1399.2	16.6062		1443.04	14.8249								195.16	4.15		260.54	5.67		1935	50		1841	33		233	4		865	13		455.403	4.46392		1891	42
	1821	21		1854	18		1882	14		253	3		1371.31	17.6274		1453.91	14.4839								246.538	4.92901		188.76	5.1		1927	52		2453	21		254	5		871	11		1098.15	41.6675		1947	42
	2225	14		2395	10		250	3		368	3		1358.5	15.5582		1462.01	14.7669								185.878	4.47688		1673.8	21		1937	49					256	3		943	12		165.126	1.93699		1883	41
	1858	10		1871	10		2475	16		360	4		1362.04	17.9697		1519.52	27.5447								196.05	3.71		254.12	4.78		1945	49					279	6		966	23		1594.44	35.335		1852	42
	1895	13		1865	18		2283	18		244	2		1359.39	17.451		1537.36	12.2513								262.152	5.40763		1724.5	25.4		1916	62					351	5		979	13		159.636	1.86473		1857	43
	253	3		1861	8		259	3		251	2		1368.89	17.9679		1582.97	28.047								198.64	3.4		1500.7	23		2215	51					1888	23		1230	97		599.781	6.42023		2479	39
	245	3		252	3		1843	9					1406.1	14.3458		1607.81	15.2498								281.39	4.61		236.32	4.77		2346	25					1859	23		1127	52		1833.34	28.2425		1868	44
	1842	20		1918	10		256	3					1384.45	15.8956		1652.28	16.6752								491.98	8.96		1879.32	42.2825		2504	25					1909	26		1757	37		141.04	2.6748		2023	40
	346	4		1843	11		1851	8					1358.94	15.5353		1682.45	16.3735											246.972	4.24641		2482	26					2467	39		1794	23		395.199	5.55751		2025	44
	1874	13		205	2		2410	11					1346.25	15.1585		1727.22	14.5879											1864.82	33.3325		2545	53					2728	52		1846	23		266.389	3.20753		2332	40
	243	3		267	4		1907	26					1361.82	16.2207		1776.23	33.5819											331.565	7.15196		2606	27								1860	54		1861.12	34.8775		2502	39
	1872	24		1850	11		1872	11					1369.99	14.8113														228.594	4.28476											1855	24		816.129	9.72304		2490	43
	1860	14		1846	8		1858	16					1388.37	17.9311														175.37	3.56											1886	41		1862.04	24.075
	1811	11		1891	17		1891	13					1360.05	13.2835														1942.29	33.49											1884	25		1857.41	25.925
	1874	13		1895	13		1858	15					1369.77	20.6168														1747.4	17.9											2175	62		274.162	3.38952
	1879	10		346	4		2032	14					1376.58	14.1251														215.122	4.51275											2072	25		1847.84	22.225
	1516	27		1872	16		241	3					1360.05	16.1539														539.6	16.7											2093	27		1962.66	60.03
	1937	17		1845	16		1861	16					1373.51	18.4096																										2272	43		1858.34	27.7775
	1864	16		1860	9		1869	10					1414.03	18.3753																										2406	20		2242.59	23.77
	2295	10		231	3		279	3					1406.31	13.087																										2428	48		1894.44	23.7625
	2114	10		1878	11		1881	11					1389.02	16.2909																										2352	177		875.925	48.1475
	1872	15		1891	12		1886	11					1431.46	19.6907																													821.446	8.36259
	2585	24		1867	11		1877	9					1385.32	17.8354																													428.151	4.48982
	2705	15		244	3		1854	46					1384.67	20.0104																													436.983	4.91137
	263	3		1879	13		2425	11					1386.19	18.6412																													1749.99	45.835
	269	3		1851	13		1877	11					1412.74	20.9663																													1853.71	23.305
	230	3		261	3		2371	12					1517.53	17.628																													246.252	2.91624
	1873	14		453	6		1844	13					1514.73	15.7881																													1965.13	25.46
	1863	17		2477	13		1862	9					1744.14	20.6578																													2491.05	20.375
	1889	14		1883	10		264	3					1546.21	15.6367																													248.516	3.35001
	1866	14		1872	14		2393	11					1605.74	18.5101																													2599.69	20.525
	1847	18		1856	16		1776	25					1828.07	18.2812																													1850.93	28.86
	1870	13		2376	16		2281	10					1757.64	17.0698
	1881	13		1853	14		1892	9					1811.43	21.1487
	247	3		2059	12		1870	8					1835.03	15.8858
	1872	14		261	3		1863	10					1969.99	20.9536
	1878	19		1867	11		2524	11					2342.05	24.5704
	1872	11		1874	18		1875	8					2439.72	14.8178
	1888	14		2485	14		1882	13
	1854	12		1880	13		1873	11
	2441	13		1867	11		1869	23
	2034	11		1886	15		2121	26
	2415	11		247	3		2450	15
	243	3		1902	12		2013	10
	1887	17		2467	20		1879	10
	1878	15		2497	9		1827	17
	2057	11		374	5		1837	14
	1850	15		1880	28		2340	10
	333	4		2426	10		1868	14
	3268	10		470	6		1844	11
	3023	14		1915	12		1845	11
	344	4		2407	16		1878	14
	247	3		356	4		1913	13
	1886	14		263	3		1882	11
	1874	16		367	5		1859	13
	1869	10		297	4		1842	15
	233	3		359	5		212	2
	1873	18		1861	15		1852	13
	241	3		1861	12		298	3
	1885	19		1885	15		1902	10
				256	3		1825	12
							2016	13
							479	5
							1857	21
							2072	9
							1860	17
							1864	14
							2074	11
							2416	14
							2104	12
							1862	20
							260	4
							234	3
[truncated: 21 more columns]

## Sheet: Data used in Fig. 2
	TRIASSIC SAMPLES N=1835																														LATE CRETACEOUS N=1075
	Lasipu 1 (Z&H, 2019)			Lasipu 3 (Z&H, 2019)			Lasipu 4 (Z&H, 2019)			Lasipu 5 (Z&H, 2019)			Lasipu 6 (Z&H, 2019)			Seical (Z&H, 2019)			Oe Baat 1 (Z&H, 2019)			Ungar-Upper SST 1 (Z&H, 2019)			Ungar-Upper SST 2 (Z&H, 2019)			Ungar-Upper SST 4 (Z&H, 2019)			Maru 1 (Z&H, 2016)			Maru 2 (Z&H, 2016)			Maru 3 (Z&H, 2016)			Maru 4 (Z&H, 2016)			Maru 5 (Z&H, 2016)			Maru 6 (Z&H, 2016)			Maru 7 (Z&H, 2016)
Count	158			91			103			128			32			141			132			122			37			131			111			123			45			116			104			126			138
Minimum	79.1			77.8			82.8			71.9			81.5			97.3			75.5			84.6			83.7			89.5			209.5			209.7			235.9			246.5			228.8			216.8			202.2
Max	2766.4			3642.9			3586.9			2697.3			2609			2641			2820			2772.9			3195.5			2812			2604.9			2726.2			2628.7			2512.7			3429.3			3926.2			2602.6
	Data	Err (1 sigma)		Data	Err (1 sigma)		Data	Err (1 sigma)		Data	Err (1 sigma)		Data	Err (1 sigma)		Data	Err (1 sigma)		Data	Err (1 sigma)		Data	Err (1 sigma)		Data	Err (1 sigma)		Data	Err (1 sigma)		Data	Err (1 sigma)		Data	Err (1 sigma)		Data	Err (1 sigma)		Data	Err (1 sigma)		Data	Err (1 sigma)		Data	Err (1 sigma)		Data
	79.1	1.5		77.8	1.14		82.8	1.11		71.9	0.98		81.5	1.65		97.3	1.3		75.5	1.4		84.6	1.1		83.7	1.2		89.5	1.4		209.5	2.6		209.7	2.99		235.9	3.32		246.5	2.8		228.8	3		216.8	2.81		202.2
	82	1		82.7	1.11		83.4	1.1		72	1.15		84.7	1.64		97.6	2.1		83.8	1.06		89	1.2		93.6	3.35		90.3	1.42		215	2.6		215.6	3.59		251.5	3.01		283.1	3.36		258.4	3.3		219.7	2.92		205.5
	82.6	1.3		83.6	1.07		84.6	1.36		73.2	1.37		86.9	2.14		100.1	1.5		84.7	1.14		89.3	1.3		96.8	1.39		93.4	1.44		218.6	2.9		216.9	2.79		253.6	3.29		283.6	3.82		262.9	3.6		229.8	2.91		209.6
	82.7	1.3		83.6	1.18		85.1	1.24		73.8	0.95		89.2	1.52		100.9	2.1		85.1	1.13		90.7	1.2		154.9	1.27		96.2	1.3		220.8	2.5		222.8	2.83		265.1	3.18		284.6	3.18		267.3	3.7		230.7	3.01		212.4
	83.9	1.2		84	1.82		85.2	1.15		77.2	1.22		90.8	1.39		102.9	2.2		85.8	1.28		91.7	1.8		169.4	1.67		96.6	1.4		222	2.7		226.9	3.31		266.2	3.05		285.7	3.22		268.1	3.8		232.1	3.65		215.5
	84.2	2.1		86.2	1.4		86.3	1.52		77.8	1.05		91.8	1.66		105.3	3.2		86.2	1.19		95.3	1.4		190.2	6.14		98.7	1.45		225.1	2.6		229.2	3.11		267.5	3.28		288.4	3.4		269.7	3.4		235.3	3.31		219.9
	84.5	2.1		86.9	1.09		88.4	1.25		78	0.99		98.2	1.61		122	2.6		86.6	1.26		98.3	1.2		199.2	2.37		100.8	1.69		229	2.7		231.3	3.64		272.6	3.23		289.2	4.14		269.9	3.6		239.1	3.05		220.4
	87.5	2.1		87.8	1.1		89.4	1.17		78.3	1.09		108.5	1.46		124	2.5		87.5	1.09		98.6	1.3		230.3	2.98		103.6	1.79		230.1	2.8		231.9	3.05		277.9	3.25		291.6	3.27		271	4.1		239.1	3.33		220.9
	88.8	2		91.4	2.03		89.9	1.51		79.3	1.09		115.2	1.97		136.7	2.3		88	1.32		98.7	1.2		232.7	3.28		103.8	1.4		231.1	2.9		245.5	3.23		289.3	3.8		292.7	3.25		271.2	3.7		239.5	3.15		221.6
	95.1	1.4		100.8	1.32		90.1	2.24		79.3	1.08		196.9	2.87		139.4	2.3		91.5	1.27		101.1	1.4		236.6	3.07		104.6	1.6		231.7	2.9		253.1	3.33		291.7	3.72		294.2	3.61		272	3.9		240.5	3.22		225.8
	96	2.4		177.4	3.44		91	1.71		79.5	0.97		234.1	4.85		154	6		93.2	1.32		124.4	1.6		251.6	2.78		106.9	2.46		232.7	3		255.3	3.58		295.2	3.79		295.1	3.37		275.8	3.6		241.2	3.11		229.8
	96.2	2.5		203.6	2.89		91.8	1.29		79.6	1.1		239.6	4.27		160.3	2.8		100	1.29		125.6	1.5		260.6	3.02		116.8	1.73		247.3	3.1		255.7	4.01		315.1	5.04		295.4	3.32		278.2	4.4		241.9	3.42		231.1
	99.1	1.3		205.4	2.51		92	1.27		79.7	1		278.3	3.89		161.8	2.2		102.1	1.31		143.2	2.1		266.7	2.58		120.5	2.41		253.1	3.1		256.2	3.68		315.8	4.06		295.8	3.35		283.7	3.9		242.6	3.19		232.4
	102.1	1.4		208.2	2.61		110.4	1.54		80.4	1.01		407.6	4.74		164.8	2		108.4	1.49		151	4		271.4	3.82		121.2	1.63		253.6	3		256.5	3.69		323.1	3.76		298.1	3.81		284.4	4		242.6	3.21		232.9
	111.3	1.8		227	2.87		204.7	2.56		80.6	1.16		514.6	5.93		169.2	2.1		109.4	1.48		151.8	3.1		286.7	7.18		140.4	2.2		255.7	3		259.6	3.34		359.1	5.26		301.7	3.46		289.2	4.4		246.3	3.42		233.3
	114	1.6		228.5	2.96		214.1	2.95		80.8	1.14		539.9	6.66		172.2	2.6		116.9	1.6		152.6	1.8		289	3.04		145.7	2.34		257.1	3.3		261.7	3.36		368.4	4.1		309.5	3.57		290.5	3.9		247.4	3.17		234.3
	160.9	1.8		231.3	2.93		215.8	3.19		80.9	1.18		543.2	6.74		172.3	2.1		200.3	2.7		157.6	2		346.2	3.22		148.9	1.99		258.4	3		262.4	4.06		372.3	4.25		310.9	4.03		291.4	3.8		249.2	3.26		240
	182.7	2.3		234.8	3.26		224.1	2.87		81	1.21		580.6	6.68		172.9	3		207.4	2.79		158	2.3		454.6	5.17		155.9	2.2		259.8	3.1		262.7	3.65		429.3	5.02		311.7	3.65		291.6	4.1		250.4	3.21		240
	210.1	3.4		248.2	3.88		224.6	2.85		81.2	1.12		605.8	6.97		175.9	2.6		214.5	2.85		163	2.1		514.1	5.03		158.2	2.4		262.2	3.4		265.3	3.72		456.4	5.22		311.7	3.53		293.4	4.1		252.6	3.23		243.3
	210.1	2.8		250	3.51		237.6	3.28		81.2	1.03		627.8	8.29		186.1	2.6		214.8	2.66		163.3	2.2		530.3	4.54		164.6	2.08		262.5	3.1		266.5	3.51		958.4	10.42		322.5	3.86		294.9	4.3		254	3.37		246.1
	213.6	2.9		258.1	3.29		238.2	11.32		81.2	1.16		629.8	11.35		188	5.1		219.3	2.75		176.1	2.3		561.2	7.73		166.7	2.29		262.9	3.2		268.4	3.99		1062.8	22.14		323.8	3.83		297.8	3.9		254.2	5.84		248.3
	214.2	2.7		263.3	3.29		239.3	3.1		81.7	1.03		681.3	10.33		191.2	2.3		225.9	2.86		179.7	2.3		561.7	4.34		169	2.21		265.4	3.5		268.7	3.53		1551.3	20.01		324.3	3.56		298.2	4.1		259.8	3.47		249.7
	223.8	5.4		263.9	3.48		240.3	3.14		82	1.06		715.5	10.53		197.7	2.4		228.9	3.17		193.9	2.8		579.9	6.32		172.3	2.47		265.9	3		269.1	3.44		1616.8	25.49		327.3	3.81		302	4.4		261.8	3.41		253.3
	224.7	3.4		265.9	3.37		248.5	3.43		82.1	1.28		1061	33.37		198.9	3.3		230.7	3.37		194.1	2.8		583.3	4.45		174.3	2.35		266.3	3.2		276.1	3.63		1676.7	19.77		330.1	3.72		302.3	3.9		262.2	3.52		258
	226.8	6.7		277.2	3.58		251.4	3.69		82.2	1.12		1148.6	52.68		201	2.4		236.6	3.01		199.9	2.4		635.3	10.08		175.5	2.61		267.7	3.3		278.8	4.49		1796.5	33.22		333.3	3.71		302.7	3.9		266.8	3.45		258.5
	228.1	2.7		279.1	3.72		256.9	3.46		82.3	1.3		1597.8	33.33		205.5	2.8		238.6	3.31		201.1	2.4		642.7	6.39		179.9	2.57		269.3	3.2		280	3.74		1827.3	23.07		339	3.86		303.6	4		268.7	3.67		262.2
	233.4	2.9		299.6	3.9		262.6	3.42		82.5	1.11		1629.2	23.6		222.5	3		249	3.52		207.8	2.5		762	6.86		182.8	2.61		272.1	3.1		282.9	3.7		1847.1	19.44		339.8	4.07		305.4	3.9		272.9	3.51		263.5
	234.3	2.7		357.2	4.46		264	3.78		82.6	1.18		1631.3	22.93		226.7	3		251.5	3.37		209.1	2.9		778.1	5.32		199.5	2.52		272.4	3.2		283.8	3.83		1850.3	21.28		346.8	4.21		306.1	3.9		273.3	3.52		263.9
	237.1	6.6		359.2	5.44		265.1	3.54		82.9	1.23		1688.5	23.59		230.5	3.2		252.7	3.4		219.3	2.8		792.4	5.21		208.3	2.93		273.5	3.2		285.4	4.31		1856.7	19.23		355.3	4.21		306.1	4.1		273.9	3.57		264.1
	241	3.5		410.6	4.99		269.7	3.52		82.9	1.18		1732.2	23.15		236.9	2.7		261.5	3.55		227.4	2.8		910.1	6.77		208.4	2.83		273.8	3.2		286.5	3.76		1856.7	19.65		356.2	4.07		306.7	4		274.4	3.6		264.4
	255.4	3.2		412.1	4.98		273.9	3.45		83	1.04		1735.6	22.15		252.8	3.4		272.6	3.4		227.8	2.8		936.7	68.2		211.5	2.95		275.8	3.4		291.1	4.24		1857	19.26		367	3.93		312.3	4		274.8	3.48		269.7
	256.2	5.6		413.7	5.11		274.1	3.46		83.2	1.13		2609	21.28		254.5	3		275.5	3.85		228.8	2.8		997.3	7.4		213.1	2.72		279.6	3.5		291.2	3.68		1860.8	20.5		397.2	4.41		313.3	4		276.5	3.5		270.1
	290.8	3.4		422.3	5.3		276.2	3.52		83.2	1.08					255.3	3.4		287.9	3.72		241.7	2.9		1008.2	94.83		219.7	2.84		285.2	3.7		293.8	3.92		1861.4	19.89		409.5	4.73		314.4	4.1		276.8	3.74		270.9
	321.7	5.2		495.4	6.05		293.2	3.73		83.3	1.12					260.8	3.4		307.7	4.08		243	2.9		1207.8	47.36		221.8	3.04		285.9	3.5		297	3.84		1862.9	19.01		436.9	5		315.4	4.3		277.4	3.61		272
	331.1	3.6		512.4	6.17		332.3	4.17		83.4	1.17					261.8	3.9		311.1	4.43		246.3	3.1		1571.4	42.77		224.3	3.13		294.4	3.6		299.3	4.32		1867.9	20.38		444.3	5.1		317.4	4.3		278.7	3.74		272.9
	349.6	4.1		513.3	6.66		361.1	4.68		83.5	1.09					263.6	3.3		325.8	4.16		246.8	2.9		2591.6	32.27		226.5	3.26		295.7	3.5		301.8	4.08		1872.6	19.94		456.7	5.08		317.6	4.1		280.1	4.17		278.2
	388.8	9.1		518.2	6.24		361.1	5.49		84	1.98					264.1	3.4		347.2	4.55		247.2	3		3195.5	37.6		232	3.57		314.4	3.7		305.6	4.1		1876.8	19.45		494.4	5.57		318.1	4.5		285.6	5.08		279.3
	440.5	5.9		527.8	6.29		362	4.76		84.2	1.17					267.7	4		354.4	4.42		248.3	3					235.4	3.57		322.4	4.4		308.6	4.03		1879.6	19.53		564.3	6.26		318.1	4.3		288.1	3.72		279.5
	443.3	5.2		529.3	6.38		438.8	5.66		84.3	1.28					269.7	3.8		362.7	5.2		249.7	3					236.3	3.05		325.4	3.8		309.3	3.94		1885.4	20.55		633.8	6.76		323	4.5		291.9	3.85		279.8
	445.4	11.5		538.6	6.48		439.4	5.51		84.9	1.14					272.8	3.3		388.9	4.81		250.6	3					246.2	3.31		330.1	3.9		312.2	4.05		1887.5	19.69		650	7.45		325.1	4.3		294	4.02		281.7
	453.9	5.2		540.4	6.43		489.7	5.93		85.4	1.15					273.7	4.8		395.2	5.01		251.6	3.7					248.1	3.23		336.7	4.1		312.3	5.53		1892.1	19.89		807	8.54		325.3	4.5		294.3	3.99		282.4
	457.5	5.1		544.9	6.54		505.6	6.15		85.7	1.21					277.2	4.4		416.2	4.99		251.6	2.9					249	3.21		340.6	3.9		312.7	4		1922.1	18.92		1060.9	24.37		326.5	4.2		294.7	3.8		282.9
	462.6	5.7		545.5	6.97		529.5	6.63		85.8	1.36					281	4.3		423.7	5.03		252.1	3.3					249.6	3.36		347.2	4.2		313.2	4.05		2048.2	69.52		1099.8	22.11		327	4.5		295	3.83		283.8
	468.6	10.4		547.5	6.53		536.1	6.63		85.9	1.28					283.7	4		464	5.51		254.5	3.3					252.2	3.61		350.4	4		314.3	4.1		2519	17.55		1166.4	22.25		329.1	4.3		296	3.79		285
	477.9	5.6		572.8	6.96		551.3	6.63		86.2	1.17					289.5	5.2		474.1	6.02		256.7	3.2					254.9	3.36		355.3	4		314.6	4.13		2628.7	19.76		1170.4	25.84		330.8	4.3		297.3	3.84		286.3
	480.8	6.2		580.8	7.17		551.8	6.67		86.3	1.11					289.5	3.3		482.3	5.75		260.7	3.1					257.6	3.42		358.4	4.3		316.2	4.28					1174.3	30.72		332.8	4.3		297.5	3.8		287
	489.7	5.3		588.9	7.1		554.4	7.28		86.4	1.08					289.6	6.3		490.3	6.85		266.8	3.2					260.4	3.39		365.4	4.5		317	4.11					1185.3	26.28		335.4	4.5		297.9	3.85		288.2
	490.7	8		597.4	7.06		556.7	6.74		87.1	1.09					289.8	3.5		500.2	5.91		275	3.2					262.5	3.49		368.9	4.2		317.3	4.16					1197.5	26.99		337.2	4.6		300.8	3.93		289.7
	491.3	5.6		613.6	7.56		564.5	7.01		87.2	1.07					290.4	3.5		519.3	6.24		285.5	3.5					263.4	3.42		371.1	4.2		318.9	4.17					1217.2	23.84		343.1	4.6		301.6	4.17		289.8
	492.1	5.9		631.1	7.77		565.1	8.33		87.4	1.19					293.1	4.9		529.2	6.52		300.6	3.8					264.3	3.54		373.2	4.5		319.2	4.22					1305.2	24.06		345.5	4.5		302.2	4.04		292.3
	493.3	5.4		632.3	8.04		567.1	7.07		87.7	1.14					298.7	3.6		534.1	7.82		306	3.7					274.8	5.46		374.7	4.3		319.4	4.14					1415.2	73.32		345.6	4.4		303.1	3.95		293.9
	498.2	6		640.2	7.8		589.4	7.07		88.1	2					298.8	4.2		536.9	6.91		306.1	3.6					275.1	3.45		375	4.2		324.9	4.39					1453.7	22.8		350.6	4.4		308	3.95		298.6
	499.6	6.1		664.2	7.95		655.4	9.22		89.3	1.28					299.3	5.7		539.1	6.59		310.7	4					276.9	3.44		390.9	4.5		327.1	4.32					1494.6	23.34		353.3	4.5		312.8	4.08		299.2
	506.5	5.6		693.1	8.09		734.2	8.66		90.4	1.34					304.3	4.2		539.4	6.47		339.4	4.2					279.5	3.82		391.9	4.5		328.2	4.38					1526.9	21.2		354	4.5		313.4	3.97		300.5
	506.9	7		765.3	9.04		750.1	9.3		92.5	1.73					307.7	5.2		548.4	6.53		352.6	4.3					281.2	3.72		398.6	4.6		334.3	4.22					1534.6	40.49		354.3	4.6		318	4.01		303.7
	508.5	5.7		854.2	9.84		755.2	9.18		94.1	1.97					315.4	4.4		551.6	6.82		357.4	4.2					281.5	3.58		398.7	4.8		343.7	4.51					1539.8	21.68		355	4.6		318.7	4.11		305.3
	511.3	6.9		906.6	10.56		784.6	9.28		101.6	1.6					317.6	3.9		557.9	6.64		362.6	4.6					283.2	3.55		399.4	4.7		344.5	4.37					1547	21.44		372.2	5		319.2	4.42		306.7
	512.2	6.6		948.1	10.87		942.6	10.94		106.9	1.81					325	4.5		564.8	6.73		383.3	4.6					284	3.84		407.2	4.7		353.4	4.55					1549.5	20.52		380.8	4.9		320.6	4.1		307.6
	523.5	5.7		954.7	11.62		983	11.6		110.1	1.38					325.2	4.2		570.2	6.76		385.1	4.6					288.4	4.45		408.4	4.7		353.6	4.67					1557.2	21.54		406.3	5.1		329.1	4.27		309.1
	528.2	7.1		957.8	11.09		1010.5	23.67		116.7	2					335.4	3.9		574.7	6.89		398.1	4.6					292.9	6.07		422	5		354.5	5.02					1565.7	21.88		413.6	5.4		332	4.24		313.4
	528.4	30.7		958.7	11.21		1023.7	23.27		119.1	1.51					345.2	5.6		579.5	6.91		408.1	5.2					295.7	3.69		425	4.8		358.2	4.8					1572.1	21.2		964.5	11.3		332.1	4.32		313.4
	530.9	6		972.4	11.35		1054.6	22.98		159.5	2.39					347.6	4.5		580.3	7.12		411.7	4.8					316.2	4.02		428.8	4.8		361.1	4.57					1577.4	20.97		1213.6	30.9		336.6	4.43		315.5
	532.1	6		977.2	12.14		1066.1	22.28		201.5	2.52					351.7	4.5		581.7	6.92		418.3	4.8					317.3	4.48		438	5		363	4.64					1579.1	20.82		1525.4	25.5		338.6	4.32		316.1
	535.4	6.2		978.3	11.34		1098.6	22.46		203.7	3.13					353.7	5.6		586.8	7		421.2	5.3					343.2	4.31		446	5.1		364.3	4.94					1579.5	20.44		1583.4	22.4		344	4.34		316.4
	538.9	7.2		987.6	26.18		1101.2	23.18		211	2.85					370.7	4.5		588.5	6.97		425.3	5.1					349.3	4.31		452.3	5		365.5	4.89					1583	26.04		1698.2	26.3		350.4	5.19		317.2
	539.9	6.6		1060.8	24.15		1128.2	25.99		213	2.94					403.7	5.4		591.2	7.25		447.8	5.3					373.5	4.81		463.2	5.3		370.3	4.76					1584.1	22.81		1720.3	25.7		356.7	4.54		318
	541.3	5.9		1062.8	24.59		1174.7	22.72		218.5	2.72					436.5	5.2		605.6	7.39		453.6	5.3					376.4	4.8		489.3	6.1		370.6	4.77					1585.2	22.58		1792.8	27.7		358.5	4.51		318.8
	548.9	7.1		1077	22.95		1185.1	21.69		219.8	3.2					440	5.6		612.9	7.37		467.7	5.6					421.7	5.53		571.9	6.5		371.6	4.76					1595.4	20.76		1815.4	23.4		359	4.77		319.1
	549.7	6		1116.7	29.82		1185.7	28.15		221.2	3.85					441.5	5.1		613.5	7.36		478.3	5.7					448.5	5.61		625.3	7		374.9	4.7					1597.9	21.37		1842.6	23.4		359.6	4.73		320.2
	551	6.2		1146.8	27.47		1197	32.43		223.4	3.46					450.5	5.8		622.4	7.29		479.2	5.6					504.7	6.34		637.4	7.1		381.3	4.78					1608	21.23		1846.8	25.5		374.1	4.98		322.2
	558	6		1155.7	25.52		1200.1	31.4		224.7	3.17					461.3	5.9		646.9	7.6		479.7	5.6					520.6	6.48		839.8	9.1		388.6	5.12					1611.6	21.67		1848.6	25.8		375	4.99		327.9
	559.4	6		1241.1	31.41		1205.8	24.95		228.9	2.77					470.8	5.7		654.7	8.05		482.1	5.6					521.8	6.46		1181	22.2		393.6	5.06					1652.2	20.94		1851.2	23.1		376	4.86		329.4
	563.1	6.3		1427.2	25.77		1262.6	23.04		231.4	3.37					477.8	6.8		667.9	8.1		493	5.8					537.3	6.64		1224	21		397.5	5.03					1708.4	21.4		1853.7	22.8		377	4.79		335.5
	565.3	6.7		1455.6	22.31		1268.2	37.2		231.8	3.7					480.8	5.7		735.8	8.8		495.2	6.1					542.4	7.18		1319.1	22.6		398	5.15					1715.5	21.26		1855.2	25		406.6	5.17		338.8
	567.3	6.4		1522.2	20.48		1288.2	23.59		236.3	3.57					485.8	10		768	9.18		501.5	5.9					547	6.8		1398.8	20.5		399.9	5.13					1722.2	21.54		1856.8	26.3		432.5	5.77		341.6
	575.9	6.1		1532.9	21.08		1371.6	21.45		245.2	3.27					486.3	6		769.5	8.93		505.4	5.9					547.1	7.32		1517.7	21.2		403.9	5.08					1725.1	20.2		1858.7	24.6		436.7	5.41		343.9
	578.3	6.6		1583.5	20.43		1376.8	20.09		252.8	3.18					491.5	5.6		805.2	9.59		512.2	6.3					551.1	7.26		1524.1	24.5		405.9	5.37					1743.5	20.87		1860.3	22.3		436.7	5.59		344.1
	586.5	9.6		1624.2	20.73		1453.8	24.31		256.7	3.98					509.5	6.3		865.7	9.83		520.8	6.9					554.4	6.79		1531.5	21.2		410.7	5.31					1751.7	20.01		1862.6	22		436.7	5.57		344.7
	589.3	6.5		1642.6	20.22		1456	24.25		261.3	3.17					522	6		867.8	10.25		522.5	6.2					556.1	6.92		1543.1	20.1		423.3	5.44					1753.7	22.36		1864.2	26.5		439.9	5.53		361.7
	602.8	6.9		1695.3	29.14		1576	22.41		326	4.13					523.1	5.8		918.5	10.62		524.9	6					561	7.51		1566.7	21.1		424.4	5.36					1763.3	20.62		1867.3	26.5		443.6	5.58		364.6
	614.4	6.6		1702.8	22.49		1619.3	21.23		332.6	4.08					527.3	8.3		954.9	10.87		529.9	6.4					563.9	6.86		1571.9	20.3		435.2	5.58					1766	20.53		1867.7	24.9		452.5	5.68		369.8
	624.5	6.9		1712.3	19.99		1640.7	19.76		357.5	4.87					528.5	7.9		955.2	11.52		544.6	6.5					565	6.98		1581.9	19.8		448.8	5.74					1778.9	19.81		1868.1	25.1		462.9	5.83		379.1
	634.4	7.4		1782.5	23.56		1645.3	22.13		366	4.47					540.5	9.3		965.7	11.02		546.7	6.3					567.6	7.51		1584.3	20		449	5.77					1782.9	20.16		1870.4	21.8		466.6	5.81		379.2
	636.7	6.9		1865.1	20.17		1663	20.26		366.5	4.35					548.3	7.4		998.2	11.42		547.2	6.2					569.6	6.86		1618.1	19.6		449.8	5.69					1805.5	19.53		1870.5	22		470.6	5.95		385.4
	647.1	7.2		1891.5	20.63		1737.9	22.48		397	5.48					554.4	6.5		1057.6	23.4		548.3	6.2					575.1	7.26		1629.6	21.6		469.1	5.84					1815.1	19.61		1871	21.4		478.7	6.08		397
	651.8	6.9		1891.7	19.31		1762.7	19.33		449.7	5.47					557.1	14.4		1070.1	25.54		561.7	6.9					598.1	7.63		1643.8	19.8		469.1	6.04					1819.5	19.57		1871	23.2		499.3	6.36		400.6
	673.8	9.5		1973.1	20.59		1765.4	20.02		478.7	5.86					557.3	6.4		1085	22.41		564.4	10.6					607.2	7.54		1659.9	20.9		479.3	5.91					1825.7	19.67		1871.1	21.4		500.6	6.39		403.1
	684.5	7.6		2017.7	19.51		1809.2	19.81		504.7	5.99					559.8	6.8		1091.6	23.47		570.5	9.8					627.9	7.6		1698.6	20.6		1518.5	21.89					1834.8	20.67		1871.8	24.5		1097.3	21.79		412.7
	767.7	8.2		2718.1	17.67		1822.5	19.19		508.8	6					562.2	6.5		1136	22.48		572.3	6.7					628.4	7.57		1701.9	21.4		1523.6	22.47					1835.6	20.53		1872.8	22.3		1102.4	21.94		413.5
	787.4	8.5		3100.8	16.96		1824.1	19.62		514.4	6.11					565.7	7.1		1150.3	36.17		589.2	7.3					633.5	7.71		1714.9	21.6		1535.4	20.97					1840.6	20.49		1873.4	21.6		1363.8	28.78		416.3
	816.1	8.6		3642.9	92.14		1837.3	21.27		518.6	6.02					567.2	10.5		1151.7	24.96		616.9	9.1					676.3	8.05		1839.5	21.9		1549.6	21.27					1843.7	21.43		1875.1	27.8		1367.8	20.38		417
	842.7	9.1					1844.1	343.08		530.9	8.32					586.3	6.5		1166.5	22.31		662.1	7.9					737.3	8.83		1848.3	22.9		1553.4	21.14					1846.2	20.8		1877.6	21.4		1417.4	20.06		443.5
	844	11.9					1876.9	19.57		537.3	6.79					586.9	7.4		1173.6	26.99		692.1	8					771.8	9.45		1849.8	21.3		1554.2	20.83					1852.4	21.17		1879.2	22		1438.8	20.11		449.4
	847.8	9.4					1888.5	19.13		550	7.16					587.7	6.5		1210.7	22.96		716.2	8.1					808.1	10.21		1850.2	20.2		1559.2	21.24					1854.7	22.97		1894.8	23.7		1460.9	19.96		458.6
	860.2	10.3					1893.8	19.21		554.5	7.5					589.6	7.7		1211.5	22.57		811.1	9.3					891	10.63		1854.6	19.4		1571.6	20.22					1855.5	20.13		1903.7	23.9		1476	20.48		462.5
	919	9.8					1901.8	18.99		568.2	7.01					594.5	7.5		1219.8	23.04		879.1	10.6					893.5	10.51		1861	20.5		1584.3	20.29					1857.3	22.85		1934.8	27.6		1478.7	23.36		463.3
	935.2	9.8					1919.5	19.25		576.5	6.79					596.1	6.7		1302	22.18		891.6	10					929.2	11.1		1861.9	19		1585.7	20.42					1858.8	20.22		1936.7	22		1516.3	20.38		1187.8
	935.4	9.9					2057.8	20.06		597.3	6.95					605.1	7.4		1387.7	35.29		924.5	11.1					933	11.98		1866.2	20.3		1592.9	21.85					1861.2	22.02		1939.9	22.5		1521.7	19.84		1417.1
	935.7	10					2456	17.75		654.4	7.6					608	18.6		1481.8	20.36		958.7	10.4					976.2	11.78		1869.2	19.3		1711.9	21.21					1863.9	20.25		1952.6	21.5		1525.3	20.37		1527.4
	936.1	10.1					3109	17.28		738.5	8.44					617.2	14		1502.9	22.34		1068	35.3					985.5	11.98		1870.1	22.2		1735.3	20.38					1864.1	19.8		1970.2	25.1		1542.2	29.53		1534.3
	938.7	11.6					3323.4	16.62		758.6	8.73					620.4	21.9		1521.7	26.28		1130.7	38.2					992.7	11.67		1871.5	21		1741.6	20.64					1865	20.2		2376.4	20.4		1545.5	19.94		1589.6
	943.2	10					3411.7	734.73		818.9	9.36					632.2	9		1533.6	20.49		1152.9	36					1014.6	24.81		1874.7	20.5		1743.7	19.97					1865.4	20.08		2514.3	21		1553.1	19.82		1597.6
	948.2	12					3586.9	16.04		865.2	9.79					643.2	7.1		1593.9	20.87		1212	25.3					1053	29.93		1883.4	19.3		1815.5	22.12					1865.9	21.21		2617.7	24.6		1554.1	19.64		1652.1
	948.9	11.1								1100.3	29.22					644	9.2		1596.4	20.44		1223	23.5					1091.7	26.5		1885.4	21.8		1838	19.99					1869.2	20.31		3429.3	83.7		1569.5	20.06		1716.9
	967.1	10.9								1120	27.07					648.8	14.2		1598.8	20.13		1245.5	28					1114.1	51.84		1885.5	20.2		1841.2	20.55					1869.9	20.62					1578.9	20.31		1814.4
	991.4	10.9								1132.1	24.54					660.6	7.4		1620.4	23.4		1272.2	23					1116.7	26.07		1912.1	19.6		1846.7	20.95					1883.4	21.9					1580.4	20.45		1832.2
	998.5	10.6								1156.2	28.47					661.2	9.5		1622.2	20.75		1432.4	22.1					1142.7	27.46		2026.2	19		1847.8	22.63					1904.7	19.3					1584.3	19.93		1835.3
	1016.8	106.5								1159.3	24.58					662.1	10.5		1622.6	19.88		1539.2	26.3					1145.4	23.52		2213.6	19.2		1854	20.46					1920.4	20.57					1596	21.66		1836.2
	1019.6	50.7								1188.7	22.74					670.5	7.8		1623	22.4		1550.4	23.5					1156.3	23.87		2324.3	19.3		1857.7	20.16					1952.4	19.06					1618.6	21.84		1844.3
	1037.8	29.8								1193.8	24.87					688.6	8.2		1626.8	19.78		1561.8	24.2					1161.4	25.08		2397.5	18.6		1858.7	20.32					1978.8	19.75					1651.3	20.16		1848.7
	1080.8	44								1204.4	22.35					696.1	8.2		1628.4	20.92		1562.5	21.3					1178.7	29.81		2604.9	20.2		1861	20.63					2026.2	19.17					1652.8	21.65		1849.1
	1083.7	37.4								1363.3	19.63					736.6	17.9		1656.1	21.42		1565.7	24.2					1546.1	20.3					1867.5	20.71					2072.3	21.95					1653.5	20.45		1854.6
	1097.9	35.7								1383.5	29.77					786	8.5		1661.5	20.05		1579.2	23.8					1548.3	20.65					1870.9	19.75					2078.8	20.14					1732.2	20.27		1856.5
	1098	53.8								1565.2	21.52					815.9	10.9		1740.6	20.34		1710.2	25.5					1548.7	20.43					1885.3	21.88					2301	19.28					1769.7	19.83		1859.5
	1109.6	48.5								1599.2	20.03					848.9	10		1777.6	19.98		1750.1	23.6					1564.9	21.77					1898.5	21.98					2424	19.09					1843.3	18.75		1860.6
	1112.2	112.7								1742.1	18.97					1008.2	39.8		1778.2	19.33		1762.1	22.7					1582.3	19.99					1921.9	19.81					2512.7	20.56					1855.9	18.94		1875.4
	1119.8	48.9								1748.5	18.78					1140.8	43.3		1806.1	20.38		1926.3	23.7					1606	23.14					1946.6	20.14											1860.2	18.84		1878
	1126.9	54								1760.1	18.84					1231.8	40		1808.4	23.32		1935.2	20					1688.8	22.72					1951	20.47											1865.4	20.19		1879.7
	1134.3	38.1								1788.8	20.37					1234.3	38.9		1811.5	20.93		1963.1	22.8					1727.2	20.47					1951.6	20.58											1879.2	19.95		1880.9
	1148.8	45.8								1809.1	18.65					1297.3	31.9		1829.4	20.24		2011.1	21.4					1751.9	20.01					2031.9	19.4											1889.9	19.12		1881.7
	1179.9	32								1841.6	21.06					1300.5	60.2		1840.1	20.93		2288.6	20.4					1853.6	20					2473.1	19.81											1896.7	19.55		1882.3
	1180.4	37								1935.6	26.12					1378.2	106.1		1850.3	18.71		2772.9	20.5					1866	21.91					2563.8	18.07											1902.7	18.8		1886.2
	1259.7	37.2								1971.5	18.49					1409.9	53.8		1850.8	18.79								2135	22.85					2726.2	17.76											2146.3	19.6		1887.2
	1266.9	48								1996.4	19.21					1490.9	29.2		1854.6	20.14								2220.5	19.06																	2184.5	18.29		1888.7
	1337.9	38								2377.9	18.26					1521.1	30.9		1959.7	19.41								2281.5	18.94																	2420.5	18.11		1896.7
	1383.7	109.4								2487.1	17.6					1531.8	42.9		1986.7	18.91								2357.1	19.52																	3926.2	26.19		1899.2
	1395.6	38								2506.9	18.51					1535.2	35.2		2052	19.08								2453.6	18.73																				1904.6
	1440.7	32.4								2697.3	17.84					1547.5	30.1		2517	18.12								2495.5	17.98																				1912.5
	1494.4	27.7														1568.1	123.7		2694.8	17.61								2502	18.5																				1915.4
	1508.8	28.2														1569.7	35.3		2710.7	18.38								2796	18.14																				1978.2
	1534.3	39														1582	35.5		2793.7	17.1								2812	18.54																				1982.3
	1555.9	39.9														1629.5	39.8		2820	16.96																													2079.9
	1559.6	31.3														1715.9	75.4																																2161.4
	1589.9	36.5														1741.1	31																																2282.5
	1593.2	35.5														1798.9	33																																2371.5
	1596.8	43.7														1858.1	26.4																																2486.4
	1616	64.2														1858.8	29.3																																2489.1
	1652	32.1														1978	26.4																																2602.6
	1689.6	42.2														2300.8	30.8
	1692.8	37.8														2570.1	50.2
	1771.9	32.1														2641	31.3
	1781.6	34.9
	1845.4	28.9
	1863.5	31.8
	1885.6	35.4
	1951.2	47
	1986.2	44.3
	2104.7	34.2
	2170.1	27.9
	2398.4	41.2
	2453.1	28.7
	2501.7	37.5
	2611	43
	2631.6	30.4
	2691.7	34.8
	2754.9	29.4
	2755.1	46
	2766.4	44.3
[truncated: 21 more columns]

## Sheet: CHI
	WK15.3 (this study)						WK16 (this study)						WK18 (this study)						WK27 (this study)						WK36 (this study)						Sadong 1 (Breitfeld et al., 2016)						Sadong 2 (Breitfeld et al., 2016)						Kuching (Breitfeld et al., 2016)						Pedawan 1 (Breitfeld et al., 2016)
Count	57						77						86						102						88						130						142						129						78
Bin Widths	68.0812						49.6819						44.5635						38.0333						44.3089						29.1923						26.6761						29.2946						50.1795
Minimum	119.37						174.49						167.54						120.606						100.82						205						212						221						86
End	4000						4000						4000						4000						4000						4000						4000						4000						4000
Chi distribution					944						1642						1004						2354						782						2236						2918						2452
chi per DoF					16.8571						21.6053						11.8118						23.3069						8.98851						17.3333						20.695						19.1562
	Data	Bins	Obs	Exp	Chi		Data	Bins	Obs	Exp	Chi		Data	Bins	Obs	Exp	Chi		Data	Bins	Obs	Exp	Chi		Data	Bins	Obs	Exp	Chi		Data	Bins	Obs	Exp	Chi		Data	Bins	Obs	Exp	Chi		Data	Bins	Obs	Exp	Chi		Data
	253.74	187.451	17	1	256		378.2	224.172	33	1	1024		262.27	212.103	19	1	324		392.4	158.64	47	1	2116		1007.8	145.129	9	1	64		1884	234.192	2	1	1		2244	238.676	3	1	4		2340	250.295	17	1	256		1773
	177.713	255.532	25	1	576		185.241	273.854	24	1	529		233.37	256.667	23	1	484		437.875	196.673	7	1	36		121.284	189.438	19	1	324		1858	263.385	15	1	196		1824	265.352	17	1	256		2011	279.589	5	1	16		1584
	184.097	323.614	9	1	64		177.475	323.536	2	1	1		168.93	301.23	8	1	49		152.92	234.706	3	1	4		214.53	233.747	14	1	169		1937	292.577	3	1	4		1867	292.028	3	1	4		1883	308.884	1	1	0		162
	242.754	391.695	1	1	0		192.96	373.218	1	1	0		244.451	345.794	2	1	1		132.03	272.739	11	1	100		158.78	278.055	13	1	144		1881	321.769	2	1	1		1863	318.704	1	1	0		3436	338.178	1	1	0		236
	175.15	459.776	1	1	0		238.62	422.9	1	1	0		1998.15	390.357	0	1	1		405.854	310.773	4	1	9		154.48	322.364	3	1	4		1844	350.962	2	1	1		1842	345.38	0	1	1		249	367.473	5	1	16		815
	237.983	527.857	0	1	1		232.266	472.582	0	1	1		303.6	434.921	0	1	1		276.651	348.806	2	1	1		139.285	366.673	3	1	4		1898	380.154	6	1	25		1841	372.056	0	1	1		361	396.767	1	1	0		148
	1111.59	595.939	0	1	1		189.291	522.264	1	1	0		1994.44	479.484	1	1	0		133.41	386.839	3	1	4		234.32	410.982	2	1	1		2532	409.346	1	1	0		475	398.732	0	1	1		284	426.062	0	1	1		143
	239.792	664.02	0	1	1		242.73	571.946	0	1	1		1801.2	524.048	0	1	1		245.5	424.873	3	1	4		396.9	455.291	2	1	1		1862	438.538	0	1	1		1883	425.408	1	1	0		234	455.357	0	1	1		148
	174.57	732.101	0	1	1		2257.1	621.628	0	1	1		199.61	568.611	1	1	0		649.263	462.906	2	1	1		219.172	499.6	0	1	1		1874	467.731	1	1	0		1867	452.085	1	1	0		1872	484.651	0	1	1		147
	194.68	800.182	0	1	1		202.74	671.309	0	1	1		261.206	613.175	1	1	0		134.675	500.939	1	1	0		175.282	543.909	2	1	1		263	496.923	2	1	1		1865	478.761	3	1	4		234	513.946	0	1	1		1099
	243.86	868.264	0	1	1		181.658	720.991	0	1	1		1924.08	657.738	1	1	0		583.911	538.972	0	1	1		133.78	588.217	2	1	1		2544	526.115	0	1	1		2143	505.437	1	1	0		1860	543.24	0	1	1		148
	232.75	936.345	0	1	1		189.41	770.673	0	1	1		1887.04	702.302	0	1	1		141.892	577.006	0	1	1		407.043	632.526	2	1	1		1830	555.308	0	1	1		1866	532.113	0	1	1		1864	572.535	0	1	1		228
	172.597	1004.43	0	1	1		192.513	820.355	0	1	1		2115.9	746.865	0	1	1		705.533	615.039	1	1	0		442.6	676.835	0	1	1		1881	584.5	0	1	1		225	558.789	0	1	1		2261	601.829	0	1	1		210
	238.85	1072.51	0	1	1		195.53	870.037	0	1	1		235.71	791.429	0	1	1		255.503	653.072	2	1	1		1023.2	721.144	0	1	1		1934	613.692	0	1	1		1841	585.465	0	1	1		363	631.124	0	1	1		228
	177.51	1140.59	1	1	0		182.89	919.719	0	1	1		185.154	835.992	0	1	1		151.96	691.105	0	1	1		220.242	765.453	0	1	1		1896	642.885	0	1	1		257	612.141	0	1	1		2058	660.419	0	1	1		289
	324.02	1208.67	0	1	1		250.78	969.401	0	1	1		172.23	880.556	0	1	1		264.914	729.139	2	1	1		617.4	809.762	2	1	1		267	672.077	0	1	1		1856	638.817	0	1	1		1806	689.713	0	1	1		86
	191.08	1276.75	0	1	1		268.09	1019.08	0	1	1		1917.59	925.119	0	1	1		697.466	767.172	0	1	1		192.934	854.071	1	1	0		1865	701.269	0	1	1		1858	665.493	0	1	1		245	719.008	0	1	1		123
	246.616	1344.83	0	1	1		2318.21	1068.77	0	1	1		170.249	969.683	0	1	1		127.302	805.205	1	1	0		1764.4	898.38	0	1	1		1841	730.462	0	1	1		461	692.169	0	1	1		252	748.302	0	1	1		547
	238.99	1412.91	0	1	1		179.859	1118.45	0	1	1		194.2	1014.25	0	1	1		2291.05	843.239	0	1	1		132.94	942.688	0	1	1		1838	759.654	0	1	1		1866	718.845	0	1	1		1863	777.597	0	1	1		256
	210.96	1480.99	0	1	1		190.951	1168.13	0	1	1		222.9	1058.81	1	1	0		133.894	881.272	1	1	0		2369.7	986.997	0	1	1		251	788.846	0	1	1		263	745.521	0	1	1		239	806.891	0	1	1		1874
	250.306	1549.08	1	1	0		185.402	1217.81	0	1	1		1991.05	1103.37	0	1	1		193.614	919.305	0	1	1		219.65	1031.31	3	1	4		251	818.038	0	1	1		1872	772.197	0	1	1		1773	836.186	0	1	1		221
	266.63	1617.16	0	1	1		246.168	1267.49	0	1	1		1861.42	1147.94	0	1	1		139.144	957.338	0	1	1		155.99	1075.62	1	1	0		242	847.231	0	1	1		2526	798.873	0	1	1		1814	865.481	0	1	1		155
	184.76	1685.24	0	1	1		234.399	1317.17	0	1	1		1881.17	1192.5	0	1	1		277.679	995.372	0	1	1		301.46	1119.92	1	1	0		352	876.423	0	1	1		258	825.549	0	1	1		358	894.775	0	1	1		155
	183.75	1753.32	0	1	1		1858.95	1366.86	0	1	1		230.34	1237.06	0	1	1		302.127	1033.4	1	1	0		157.263	1164.23	0	1	1		1889	905.615	0	1	1		424	852.225	0	1	1		1850	924.07	0	1	1		1864
	190.976	1821.4	0	1	1		180.245	1416.54	0	1	1		194.37	1281.63	0	1	1		131.38	1071.44	0	1	1		453.22	1208.54	0	1	1		1878	934.808	0	1	1		254	878.901	0	1	1		1881	953.364	0	1	1		124
	272.104	1889.48	0	1	1		243.97	1466.22	0	1	1		256.139	1326.19	0	1	1		132.036	1109.47	0	1	1		209.545	1252.85	0	1	1		2199	964	0	1	1		292	905.577	0	1	1		1860	982.659	0	1	1		195
	175.94	1957.56	0	1	1		189.96	1515.9	0	1	1		262.87	1370.75	0	1	1		122.931	1147.5	0	1	1		348.6	1297.16	0	1	1		486	993.192	0	1	1		2732	932.254	0	1	1		250	1011.95	0	1	1		217
	181.94	2025.64	0	1	1		236.512	1565.58	0	1	1		228.24	1415.32	0	1	1		131.071	1185.54	1	1	0		260.738	1341.47	0	1	1		2330	1022.38	0	1	1		1871	958.93	0	1	1		232	1041.25	0	1	1		140
	229.53	2093.73	0	1	1		247.933	1615.27	0	1	1		172.35	1459.88	0	1	1		162.552	1223.57	0	1	1		215.769	1385.78	1	1	0		1856	1051.58	0	1	1		1824	985.606	0	1	1		1899	1070.54	0	1	1		159
	2486.73	2161.81	0	1	1		353.391	1664.95	0	1	1		570.347	1504.44	1	1	0		142.106	1261.6	1	1	0		251.7	1430.09	0	1	1		1916	1080.77	0	1	1		2164	1012.28	0	1	1		1895	1099.84	0	1	1		568
	253.73	2229.89	0	1	1		1987.35	1714.63	0	1	1		1041.4	1549.01	0	1	1		139.442	1299.64	0	1	1		1019.1	1474.39	0	1	1		1827	1109.96	0	1	1		462	1038.96	0	1	1		2059	1129.13	0	1	1		248
	179.63	2297.97	0	1	1		206.18	1764.31	0	1	1		210.33	1593.57	0	1	1		131.325	1337.67	0	1	1		1056.4	1518.7	0	1	1		255	1139.15	0	1	1		1856	1065.63	0	1	1		1863	1158.43	0	1	1		125
	2557.72	2366.05	0	1	1		245.61	1813.99	1	1	0		1719.3	1638.14	0	1	1		136.388	1375.7	0	1	1		2835.4	1563.01	0	1	1		1879	1168.35	0	1	1		2446	1092.31	0	1	1		1838	1187.72	0	1	1		118
	263.27	2434.13	0	1	1		174.801	1863.68	6	1	25		630.004	1682.7	1	1	0		136.233	1413.74	0	1	1		118.86	1607.32	1	1	0		264	1197.54	0	1	1		1860	1118.99	0	1	1		1647	1217.02	0	1	1		96
	446.2	2502.21	1	1	0		174.49	1913.36	1	1	0		1987.04	1727.26	2	1	1		133.863	1451.77	1	1	0		560	1651.63	0	1	1		401	1226.73	0	1	1		1866	1145.66	0	1	1		1853	1246.31	0	1	1		228
	206.52	2570.29	1	1	0		1973.15	1963.04	1	1	0		234.81	1771.83	1	1	0		189.37	1489.8	1	1	0		334.9	1695.94	1	1	0		2230	1255.92	0	1	1		1864	1172.34	0	1	1		1866	1275.6	0	1	1		1851
	228.393	2638.38	0	1	1		197.99	2012.72	2	1	1		191.67	1816.39	3	1	4		256.636	1527.84	0	1	1		150.14	1740.25	1	1	0		305	1285.12	0	1	1		250	1199.01	0	1	1		1875	1304.9	0	1	1		153
	185.72	2706.46	0	1	1		1855.56	2062.4	0	1	1		1777.2	1860.95	2	1	1		138.616	1565.87	0	1	1		235.143	1784.56	1	1	0		1866	1314.31	0	1	1		273	1225.69	0	1	1		1873	1334.19	0	1	1		178
	173.343	2774.54	0	1	1		1858.95	2112.09	1	1	0		177.566	1905.52	8	1	49		1440	1603.9	0	1	1		140.85	1828.87	0	1	1		1891	1343.5	0	1	1		1873	1252.37	0	1	1		1877	1363.49	0	1	1		1312
	183.41	2842.62	0	1	1		197.33	2161.77	1	1	0		199.693	1950.08	5	1	16		126.351	1641.94	0	1	1		200.72	1873.17	0	1	1		1868	1372.69	0	1	1		1866	1279.04	0	1	1		373	1392.78	0	1	1		145
	215.76	2910.7	0	1	1		1842.6	2211.45	0	1	1		446.08	1994.64	4	1	9		130.77	1679.97	0	1	1		134.076	1917.48	1	1	0		249	1401.88	0	1	1		1862	1305.72	0	1	1		1852	1422.08	0	1	1		256
	119.37	2978.78	0	1	1		1857.41	2261.13	1	1	0		222.36	2039.21	1	1	0		141.963	1718	1	1	0		211.26	1961.79	0	1	1		1875	1431.08	0	1	1		261	1332.39	0	1	1		1872	1451.37	0	1	1		155
	258.42	3046.86	0	1	1		258.22	2310.81	0	1	1		247.323	2083.77	0	1	1		428.441	1756.04	0	1	1		1901.85	2006.1	0	1	1		1776	1460.27	0	1	1		1845	1359.07	0	1	1		2278	1480.67	0	1	1		1410
	301.8	3114.94	0	1	1		2113.27	2360.5	1	1	0		207.084	2128.33	1	1	0		130.473	1794.07	0	1	1		208.763	2050.41	0	1	1		1871	1489.46	0	1	1		2423	1385.75	0	1	1		242	1509.96	0	1	1		186
	247.41	3183.03	0	1	1		1791.66	2410.18	0	1	1		1902.16	2172.9	0	1	1		133.633	1832.1	0	1	1		164.607	2094.72	0	1	1		1859	1518.65	0	1	1		1838	1412.42	0	1	1		2374	1539.26	1	1	0		246
	213.716	3251.11	0	1	1		1842.7	2459.86	0	1	1		172.578	2217.46	0	1	1		219.551	1870.14	2	1	1		1694.1	2139.03	0	1	1		1860	1547.85	0	1	1		259	1439.1	0	1	1		263	1568.55	0	1	1		1089
	270.524	3319.19	0	1	1		2065.7	2509.54	0	1	1		1799.1	2262.02	0	1	1		132.631	1908.17	0	1	1		173.53	2183.34	0	1	1		327	1577.04	0	1	1		1872	1465.77	0	1	1		2506	1597.84	0	1	1		150
	232.29	3387.27	0	1	1		198.29	2559.22	0	1	1		1933.34	2306.59	0	1	1		143.596	1946.2	0	1	1		155.6	2227.65	0	1	1		1872	1606.23	0	1	1		260	1492.45	0	1	1		1855	1627.14	0	1	1		89
	217.969	3455.35	0	1	1		1876.24	2608.91	0	1	1		1927.47	2351.15	0	1	1		1255.9	1984.24	1	1	0		254.9	2271.95	0	1	1		2231	1635.42	0	1	1		2409	1519.13	0	1	1		1870	1656.43	1	1	0		207
	312.104	3523.43	0	1	1		181.18	2658.59	0	1	1		257.493	2395.71	0	1	1		404.517	2022.27	0	1	1		223.7	2316.26	0	1	1		252	1664.62	0	1	1		250	1545.8	0	1	1		1883	1685.73	0	1	1		165
	1515.5	3591.51	0	1	1		191.78	2708.27	0	1	1		261.36	2440.28	0	1	1		1484.71	2060.3	0	1	1		174.927	2360.57	1	1	0		244	1693.81	0	1	1		1870	1572.48	0	1	1		1851	1715.02	0	1	1		234
	194.61	3659.59	0	1	1		192.76	2757.95	0	1	1		220.17	2484.84	0	1	1		255.784	2098.34	0	1	1		158.591	2404.88	1	1	0		1901	1723	0	1	1		261	1599.15	0	1	1		1877	1744.32	0	1	1		606
	271.003	3727.68	0	1	1		190.03	2807.63	0	1	1		272.714	2529.4	0	1	1		141.712	2136.37	0	1	1		270.55	2449.19	0	1	1		1876	1752.19	0	1	1		2272	1625.83	0	1	1		1857	1773.61	1	1	0		176
	176.89	3795.76	0	1	1		250.32	2857.32	0	1	1		1845.99	2573.97	0	1	1		196.679	2174.4	0	1	1		225.52	2493.5	0	1	1		1853	1781.38	1	1	0		1863	1652.51	0	1	1		1856	1802.91	0	1	1		156
	196.436	3863.84	0	1	1		260.02	2907	0	1	1		245.444	2618.53	0	1	1		134.86	2212.44	0	1	1		168.83	2537.81	0	1	1		378	1810.58	1	1	0		1865	1679.18	0	1	1		1879	1832.2	5	1	16		205
	177.47	3931.92	0	1	1		194.474	2956.68	0	1	1		219.19	2663.1	0	1	1		851.032	2250.47	0	1	1		563.93	2582.12	0	1	1		1879	1839.77	4	1	9		1864	1705.86	0	1	1		1871	1861.5	17	1	256		1202
	291.02	4000	0	1	1		1934.1	3006.36	0	1	1		239.71	2707.66	0	1	1		129.797	2288.5	0	1	1		184.73	2626.43	0	1	1		1882	1868.96	30	1	841		1858	1732.54	0	1	1		1859	1890.79	43	1	1764		141
							237.98	3056.04	0	1	1		239.824	2752.22	0	1	1		135.067	2326.54	1	1	0		237.71	2670.73	0	1	1		1805	1898.15	33	1	1024		440	1759.21	0	1	1		1980	1920.09	5	1	16		118
							239.71	3105.72	0	1	1		1854.02	2796.79	0	1	1		2357.8	2364.57	1	1	0		168.49	2715.04	0	1	1		1879	1927.35	6	1	25		252	1785.89	1	1	0		1890	1949.38	2	1	1		1818
							190.49	3155.41	0	1	1		177.98	2841.35	0	1	1		270.31	2402.6	0	1	1		252.66	2759.35	0	1	1		1856	1956.54	2	1	1		2094	1812.56	0	1	1		1892	1978.67	0	1	1		174
							276.98	3205.09	0	1	1		264.24	2885.91	0	1	1		218.697	2440.64	0	1	1		293.465	2803.66	0	1	1		2009	1985.73	0	1	1		1875	1839.24	6	1	25		2422	2007.97	1	1	0		206
							247.765	3254.77	0	1	1		245.122	2930.48	0	1	1		134.818	2478.67	0	1	1		100.82	2847.97	1	1	0		1927	2014.92	1	1	0		2050	1865.92	40	1	1521		1869	2037.26	2	1	1		256
							203.05	3304.45	0	1	1		1875.93	2975.04	0	1	1		999.41	2516.7	0	1	1		621.8	2892.28	0	1	1		1853	2044.12	0	1	1		1854	1892.59	32	1	961		1900	2066.56	4	1	9		1031
							256.88	3354.13	0	1	1		167.54	3019.6	0	1	1		248.15	2554.74	0	1	1		238.699	2936.59	0	1	1		1836	2073.31	1	1	0		1867	1919.27	3	1	4		2535	2095.85	0	1	1		1776
							233.1	3403.82	0	1	1		207.56	3064.17	0	1	1		128.921	2592.77	0	1	1		509.941	2980.9	0	1	1		1892	2102.5	2	1	1		1853	1945.94	0	1	1		1940	2125.15	1	1	0		168
							254.055	3453.5	0	1	1		1883.5	3108.73	0	1	1		129.312	2630.8	0	1	1		1106.2	3025.2	0	1	1		1846	2131.69	0	1	1		1855	1972.62	0	1	1		1876	2154.44	0	1	1		1770
							254.062	3503.18	0	1	1		225.317	3153.29	0	1	1		371.785	2668.84	0	1	1		793.6	3069.51	0	1	1		2432	2160.88	0	1	1		1858	1999.3	0	1	1		1864	2183.74	0	1	1		122
							258.892	3552.86	0	1	1		1987.04	3197.86	0	1	1		135.668	2706.87	0	1	1		245.19	3113.82	0	1	1		1874	2190.08	0	1	1		1846	2025.97	2	1	1		221	2213.03	0	1	1		1792
							175.79	3602.54	0	1	1		235.69	3242.42	0	1	1		310.8	2744.9	1	1	0		243.521	3158.13	0	1	1		2098	2219.27	1	1	0		1841	2052.65	2	1	1		2056	2242.33	1	1	0		270
							195.16	3652.23	0	1	1		260.54	3286.98	0	1	1		158.697	2782.94	0	1	1		156.82	3202.44	0	1	1		2096	2248.46	2	1	1		2142	2079.32	2	1	1		1831	2271.62	1	1	0		685
							246.538	3701.91	0	1	1		188.76	3331.55	0	1	1		143.183	2820.97	0	1	1		361.669	3246.75	0	1	1		1854	2277.65	0	1	1		1882	2106	2	1	1		1821	2300.91	2	1	1		603
							185.878	3751.59	0	1	1		1673.8	3376.11	0	1	1		1157.3	2859	0	1	1		175.1	3291.06	0	1	1		2395	2306.85	0	1	1		250	2132.68	1	1	0		2225	2330.21	0	1	1		170
							196.05	3801.27	0	1	1		254.12	3420.67	0	1	1		484.369	2897.04	0	1	1		1595.1	3335.37	0	1	1		1871	2336.04	1	1	0		2475	2159.35	2	1	1		1858	2359.5	1	1	0		363
							262.152	3850.95	0	1	1		1724.5	3465.24	0	1	1		131.62	2935.07	0	1	1		231.609	3379.68	0	1	1		1865	2365.23	0	1	1		2283	2186.03	1	1	0		1895	2388.8	1	1	0		247
							198.64	3900.64	0	1	1		1500.7	3509.8	0	1	1		150.214	2973.1	0	1	1		155.39	3423.98	0	1	1		1861	2394.42	1	1	0		259	2212.7	0	1	1		253	2418.09	1	1	0		128
							281.39	3950.32	0	1	1		236.32	3554.37	0	1	1		2726.86	3011.13	0	1	1		528.8	3468.29	0	1	1		252	2423.62	2	1	1		1843	2239.38	0	1	1		245	2447.39	2	1	1		169
							491.98	4000	0	1	1		1879.32	3598.93	0	1	1		261.315	3049.17	0	1	1		146.58	3512.6	0	1	1		1918	2452.81	2	1	1		256	2266.06	1	1	0		1842	2476.68	0	1	1		1461
													246.972	3643.49	0	1	1		237.877	3087.2	0	1	1		130.3	3556.91	0	1	1		1843	2482	2	1	1		1851	2292.73	3	1	4		346	2505.98	0	1	1		150
													1864.82	3688.06	0	1	1		125.78	3125.23	0	1	1		1358.55	3601.22	0	1	1		205	2511.19	2	1	1		2410	2319.41	0	1	1		1874	2535.27	2	1	1
													331.565	3732.62	0	1	1		137.817	3163.27	0	1	1		290.31	3645.53	0	1	1		267	2540.38	1	1	0		1907	2346.08	1	1	0		243	2564.57	0	1	1
													228.594	3777.18	0	1	1		1962.66	3201.3	0	1	1		226.696	3689.84	0	1	1		1850	2569.58	1	1	0		1872	2372.76	1	1	0		1872	2593.86	1	1	0
													175.37	3821.75	0	1	1		291.898	3239.33	0	1	1		237.9	3734.15	0	1	1		1846	2598.77	0	1	1		1858	2399.44	1	1	0		1860	2623.16	0	1	1
													1942.29	3866.31	0	1	1		1842.6	3277.37	0	1	1		1733.7	3778.46	0	1	1		1891	2627.96	0	1	1		1891	2426.11	5	1	16		1811	2652.45	0	1	1
													1747.4	3910.87	0	1	1		131.182	3315.4	0	1	1		2318	3822.76	0	1	1		1895	2657.15	0	1	1		1858	2452.79	2	1	1		1874	2681.74	0	1	1
													215.122	3955.44	0	1	1		143.24	3353.43	0	1	1		797.633	3867.07	0	1	1		346	2686.35	0	1	1		2032	2479.46	1	1	0		1879	2711.04	1	1	0
													539.6	4000	0	1	1		383.455	3391.47	0	1	1		159.72	3911.38	0	1	1		1872	2715.54	0	1	1		241	2506.14	0	1	1		1516	2740.33	0	1	1
																			240.058	3429.5	0	1	1		821.3	3955.69	0	1	1		1845	2744.73	0	1	1		1861	2532.82	2	1	1		1937	2769.63	0	1	1
																			623.302	3467.53	0	1	1		236.679	4000	0	1	1		1860	2773.92	0	1	1		1869	2559.49	0	1	1		1864	2798.92	0	1	1
																			772.628	3505.57	0	1	1								231	2803.12	0	1	1		279	2586.17	0	1	1		2295	2828.22	0	1	1
																			319.57	3543.6	0	1	1								1878	2832.31	0	1	1		1881	2612.85	0	1	1		2114	2857.51	0	1	1
																			129.846	3581.63	0	1	1								1891	2861.5	0	1	1		1886	2639.52	0	1	1		1872	2886.81	0	1	1
																			244.644	3619.67	0	1	1								1867	2890.69	0	1	1		1877	2666.2	0	1	1		2585	2916.1	0	1	1
																			166.13	3657.7	0	1	1								244	2919.88	0	1	1		1854	2692.87	0	1	1		2705	2945.4	0	1	1
																			134.076	3695.73	0	1	1								1879	2949.08	0	1	1		2425	2719.55	0	1	1		263	2974.69	0	1	1
																			120.606	3733.77	0	1	1								1851	2978.27	0	1	1		1877	2746.23	1	1	0		269	3003.98	0	1	1
																			132.261	3771.8	0	1	1								261	3007.46	0	1	1		2371	2772.9	0	1	1		230	3033.28	1	1	0
																			1690.8	3809.83	0	1	1								453	3036.65	0	1	1		1844	2799.58	0	1	1		1873	3062.57	0	1	1
																			170.3	3847.87	0	1	1								2477	3065.85	0	1	1		1862	2826.25	0	1	1		1863	3091.87	0	1	1
																			1850.01	3885.9	0	1	1								1883	3095.04	0	1	1		264	2852.93	0	1	1		1889	3121.16	0	1	1
																			360.416	3923.93	0	1	1								1872	3124.23	0	1	1		2393	2879.61	0	1	1		1866	3150.46	0	1	1
																			161.504	3961.97	0	1	1								1856	3153.42	0	1	1		1776	2906.28	0	1	1		1847	3179.75	0	1	1
																			131.983	4000	0	1	1								2376	3182.62	0	1	1		2281	2932.96	0	1	1		1870	3209.05	0	1	1
																															1853	3211.81	0	1	1		1892	2959.63	0	1	1		1881	3238.34	0	1	1
																															2059	3241	0	1	1		1870	2986.31	0	1	1		247	3267.64	0	1	1
																															261	3270.19	0	1	1		1863	3012.99	0	1	1		1872	3296.93	1	1	0
																															1867	3299.38	0	1	1		2524	3039.66	0	1	1		1878	3326.22	0	1	1
																															1874	3328.58	0	1	1		1875	3066.34	0	1	1		1872	3355.52	0	1	1
																															2485	3357.77	0	1	1		1882	3093.01	0	1	1		1888	3384.81	0	1	1
																															1880	3386.96	0	1	1		1873	3119.69	0	1	1		1854	3414.11	0	1	1
																															1867	3416.15	0	1	1		1869	3146.37	0	1	1		2441	3443.4	1	1	0
																															1886	3445.35	0	1	1		2121	3173.04	0	1	1		2034	3472.7	0	1	1
																															247	3474.54	0	1	1		2450	3199.72	0	1	1		2415	3501.99	0	1	1
																															1902	3503.73	0	1	1		2013	3226.39	0	1	1		243	3531.29	0	1	1
																															2467	3532.92	0	1	1		1879	3253.07	0	1	1		1887	3560.58	0	1	1
																															2497	3562.12	0	1	1		1827	3279.75	0	1	1		1878	3589.88	0	1	1
																															374	3591.31	0	1	1		1837	3306.42	0	1	1		2057	3619.17	0	1	1
																															1880	3620.5	0	1	1		2340	3333.1	0	1	1		1850	3648.47	0	1	1
																															2426	3649.69	0	1	1		1868	3359.77	0	1	1		333	3677.76	0	1	1
																															470	3678.88	0	1	1		1844	3386.45	0	1	1		3268	3707.05	0	1	1
																															1915	3708.08	0	1	1		1845	3413.13	0	1	1		3023	3736.35	0	1	1
																															2407	3737.27	0	1	1		1878	3439.8	0	1	1		344	3765.64	0	1	1
																															356	3766.46	0	1	1		1913	3466.48	0	1	1		247	3794.94	0	1	1
																															263	3795.65	0	1	1		1882	3493.15	0	1	1		1886	3824.23	0	1	1
																															367	3824.85	0	1	1		1859	3519.83	0	1	1		1874	3853.53	0	1	1
																															297	3854.04	0	1	1		1842	3546.51	0	1	1		1869	3882.82	0	1	1
																															359	3883.23	0	1	1		212	3573.18	0	1	1		233	3912.12	0	1	1
																															1861	3912.42	0	1	1		1852	3599.86	0	1	1		1873	3941.41	0	1	1
																															1861	3941.62	0	1	1		298	3626.54	0	1	1		241	3970.71	0	1	1
																															1885	3970.81	0	1	1		1902	3653.21	0	1	1		1885	4000	0	1	1
																															256	4000	0	1	1		1825	3679.89	0	1	1
																																					2016	3706.56	0	1	1
																																					479	3733.24	0	1	1
																																					1857	3759.92	0	1	1
																																					2072	3786.59	0	1	1
																																					1860	3813.27	0	1	1
																																					1864	3839.94	0	1	1
																																					2074	3866.62	0	1	1
																																					2416	3893.3	0	1	1
																																					2104	3919.97	0	1	1
																																					1862	3946.65	0	1	1
																																					260	3973.32	0	1	1
																																					234	4000	0	1	1
[truncated: 389 more columns]

## Sheet: NOT USED
	W Borneo + SW Borneo
	Present Coordinates	2.011944, 109.635556	1.37708, 110.81585	1.147222, 111.864167	1.145556, 111.884167	1.37728, 110.81594	1.57748, 109.89238	1.577000, 109.620000	-0.605900, 111.720100	-1.533333, 111.291667
	Age	L CRETA	L CRETA	L CRETA	L CRETA	L CRETA	L CRETA	L CRETA	L CRETA	L CRETA
	Label	1023	1024	1025	1026	1027	1028	1029	1030	1031
		Serabang 2	Ngili 2	Lupar 1	Lupar 2	Ngili 1	Pedawan 1	Serabang 4	PMG	Ketapang 1
	Maximum Likelihood Age (G&L, 1993)	95±4 Ma	94±4 Ma	90±2 Ma	90±3 Ma	86±1 Ma	86±1 Ma	81±1 Ma	79±1 Ma	78±1 Ma
Significant peaks* (Ma) (G&G, 1990)	>100 Ma	126		115	115	114	142		107	125
		180			158
	200 Ma-300 Ma	249	255	248	255	254	228	238	228	235
	300 Ma-1000 Ma		358	415		364	737	888	440	442
										853
	>1000 Ma	1867	1964	1958	1942	2171	1751	1949	1080	2302
									2065
	MIN	93	94	88	90	85.5	86	81	78.75	77.7013
	10th	117	242	99	103	237.7	124.7	228.9	145.88	163.818
	20th	134.2	247	110.4	109	245.9	148	249	175.28	238.588
	25th Percentile	142.5	249.75	113	111.5	247.5	150.75	258.5	226.95	254.868
	30th	164.8	251	115.8	120	250	155.1	263	230.34	371.801
	40th	226.2	254	124.4	123.2	254.3	173.2	704.2	249.08	446.829
	50th Percentile	255	256.5	129	129	256.9	208.5	1833.5	267.1	758.634
	60th	299.6	264.4	232.2	159.4	260.5	238	1863.2	406.52	915.068
	70th	1766.4	270.3	256.2	249.6	279.9	287.1	1886.8	463.32	1272.22
	75th Percentile	1777	277.25	259	251.5	354.7	594.25	1920.25	667.65	1835.19
	80th	1810.2	306.8	482.2	259.8	374.7	944.6	1969.2	835.52	1860.75
	90th	1833.4	1817.2	1848.2	1826.4	1847.3	1639.8	2097.7	1837.8	2360.81
	MAX	2500	2480	2515	2148	2530.3	1874	2709	2495	3298.15
	Range	2407	2386	2427	2058	2444.8	1788	2628	2416.25	3220.45
	Count	79	140	57	59	61	78	98	55	113
	Percentile/Chi	13.4214	0.318404	1.55556	1.14416	0.819345	7.28284	180.984	16.7843	164.087
	Chi per DoF	10.2821	45.5396	19.2857	22.7241	23.4333	11.5065	8.86598	7.22222	3.625
	10-50 percentile Ma	138	14.5	30	26	19.2	83.8	1604.6	121.22	594.816
		T	AC	AC	AC	AC	AC	PD	T	PD
				Percentile/Chi
	AC	Active/Convergent		< 9.38
	PD	Passive/Divergent		> 21
	T	Transitional		In between
	Java + SE Borneo + Sulawesi
	Present Coordinates	-7.516483, 109.708183	-7.499667, 109.742250	-3.67698, 114.84825	-4.75693, 119.70929	-3.388897, 114.994697	-3.123889, 115.150194	-2.969333, 115.263389	-3.267861, 115.139667	-3.123889, 115.150194	-3.295556, 115.234167	-3.267861, 115.139667	-3.123889, 115.150194	-3.123889, 115.150194	-3.293361, 115.258194	-3.262708, 115.333689	-3.293361, 115.258194	-3.496389, 114.776111	-3.500000, 114.750000
	Age	JURA	E CRETA	E CRETA	E CRETA	E CRETA	E CRETA	L CRETA	L CRETA	L CRETA	L CRETA	L CRETA	L CRETA	L CRETA	L CRETA	L CRETA	L CRETA	L CRETA	L CRETA
	Label	2006	2007	2008	2009	2010	2011	2012	2013	2014	2015	2016	2017	2018	2019	2020	2021	2022	2023
		Luk Ulo 1	Luk Ulo 2	Meratus	Bantimala	Keramaian	Tambak 2	Tambak 3	Mangkook 1	Tambak 5	Paniungang	Mangkook 2	Tambak 1	Tambak 4	Manunggul 2	Manunggul 1	Paau	Cempaka 2	Cempaka 1
	Maximum Likelihood Age (G&L, 1993)	150±5 Ma	130±4 Ma	126±1 Ma	111±1 Ma	106 Ma	100±3 Ma	98±2 Ma	97±1 Ma	94±1 Ma	91±1 Ma	91±1 Ma	88±1 Ma	87±1 Ma	87±1 Ma	82±1 Ma	81±0.2 Ma	79±2 Ma	75±1 Ma
Significant age peaks* (Ma) (G&G, 1990)	>100 Ma		155	127	111	111	100	102	98	96	97	96	97	93	106	101	80	93	90
				132		128					190						84	139	112
	200 Ma-300 Ma	221	210		216			235		214			288		217	229
			254
	300 Ma-1000 Ma	727	376		397		339	424	408	390	382	387	396	335	407	394		376	392
							418
	>1000 Ma						1371	1456	1835	1549		1408	1469		1045	1034			1430
					1913			2105							2282	1749
	MIN	44	117	121	97.9	102	76.1321	80.208	85.363	74.348	81.4	77.5335	79.0619	72.0535	82.1	80.5	76.33	79.08	75
	10th	198	167.9	125	107.96	107.88	86.6543	93.5007	88.276	88.454	90.53	85.4712	87.6273	83.8806	92.9	89.76	78.6	85.045	83.57
	20th	206	193.6	126	109.2	109.32	93.31	101.717	92.3951	91.5435	92.26	91.1749	98.4164	87.4493	108.14	94.4	79.48	87.38	89.1
	25th Percentile	210	201.75	126	109.45	109.9	97.6451	106.481	95.5971	93.2466	92.9	92.77	103.785	88.3682	112	99.8	80.1	90.9	93.275
	30th	213	203	126.3	110.58	110.24	105.422	110.176	96.5878	95.7622	93.63	95.7051	109.86	89.2679	114.15	104.22	80.27	94.88	95.05
	40th	217	214.2	127.4	111.42	111.1	114.662	213.863	100.143	104.153	98.92	101.235	282.219	92.2807	125.8	116.6	80.8	96.01	103
	50th Percentile	221	218	129	113.5	111.9	316.975	251.097	105.942	115.383	108.15	106.798	347.406	103.69	235.35	195.5	81.15	97.07	105
	60th	225	225.8	130.6	115.46	112.96	353.621	365.557	110.645	320.411	197.8	280.641	369.979	107.742	336.7	267.1	81.54	97.7	111.6
	70th	231	235	132	201.44	114.8	401.226	409.005	276.553	347.663	352.34	354.427	405.393	254.196	421.55	370.1	82.8	102.4	318.5
	75th Percentile	236	239	133	210.15	116.3	409.033	566.33	378.752	356.623	366.35	362.049	418.268	329.939	563.3	427.475	83.3	130.45	360.25
	80th	239	244.8	133	218.3	120.02	440.804	1373.99	413.04	366.789	396.8	402.695	425.169	342.518	911.1	760.74	83.6	136.65	388
	90th	348	301.9	135	389.36	124.82	1383.04	1518.35	442.297	489.782	426.85	1329.39	1537.08	364.98	1806	1180.62	84.51	315.5	529.4
	MAX	1759	748	140	2149.9	163	2548.26	2496.71	2241.73	2473.31	2704	2454.81	2579.53	1747.22	3166	2088	230.8	1674.8	2716
	Range	1715	631	19	2052	61	2472.13	2416.5	2156.37	2398.96	2622.6	2377.28	2500.47	1675.17	3083.9	2007.5	154.47	1595.72	2641
	Count	101	64	82	59	69	92	87	95	89	112	110	107	90	136	130	100	96	58
	Percentile/Chi	0.526557	1.99766	0.0487805	0.193333	0.06	12.2855	12.503	0.434936	1.0646	0.515232	0.641623	16.489	0.532967	10.8281	5.43012	0.0260204	0.236028	0.832091
	Chi per DoF	43.68	25.0794	82	28.6552	67	18.7473	12.6047	40.617	25.2955	34.1982	33.2385	15.7547	37.1685	13.1556	19.4729	98	50.9474	25.7544
	10-50 percentile Ma	23	50.1	4	5.54	4.02	230.32	157.596	17.6658	26.9295	17.62	21.3266	259.779	19.8096	142.45	105.74	2.55	12.025	21.43
		AC	AC	AC	AC	AC	T	T	AC	AC	AC	AC	T	AC	T	AC	AC	AC	AC
				Percentile/Chi
	AC	Active/Convergent		< 9.38
	PD	Passive/Divergent		> 21
	T	Transitional		In between
	Banda terranes
	Present Coordinates	-9.70905, 119.45438
	Age	PALEOCENE
	Label	2032
		Lasipu 2
	Maximum Likelihood Age (G&L, 1993)	64±1 Ma
Significant age peaks* (Ma) (G&G, 1990)	>100 Ma	89
	200 Ma-300 Ma	240
	300 Ma-1000 Ma	549
		960
	>1000 Ma	2189
	MIN	64.1
	10th	204.69
	20th	372.5
	25th Percentile	452.775
	30th	530.29
	40th	568.84
	50th Percentile	626.05
	60th	953.4
	70th	1136.98
	75th Percentile	1207.97
	80th	1599.96
	90th	1807.95
	MAX	2841.2
	Range	2777.1
	Count	72
	Percentile/Chi	138.503
	Chi per DoF	3.04225
	10-50 percentile Ma	421.36
		PD
				Percentile/Chi
	AC	Active/Convergent		< 9.38
	PD	Passive/Divergent		> 21
	T	Transitional		In between
	*This study
	*Only ages more than 5% are listed
	*Coordinates in red are not exact as the authors didn't provide them
	* ☐ "Thick outside border" Data used in Figure 1 and Figure 2
